# Supplementary material
Source: PubMed Central journal article supplement (PMC8017916)
Supplement: mmc1.pdf [file mmc1.pdf]

# Supplementary to “Immunogenicity and Antigenicity based T-cell and B-cell Epitopes Identification from Conserved Regions of 10664 SARS-CoV-2 Genomes”

Nimisha Ghosh<sup>a,d</sup>, Nikhil Sharma<sup>b,d</sup>, Indrajit Saha<sup>c,d,\*</sup>

<sup>a</sup>Department of Computer Science and Information Technology, Institute of Technical Education and Research, Siksha ‘O’ Anusandhan (Deemed to be University), Bhubaneswar, Orissa, India

<sup>b</sup>Department of Electronics and Communication Engineering, Jaypee Institute of Information Technology, Noida, Uttar Pradesh, India

<sup>c</sup>Department of Computer Science and Engineering,

National Institute of Technical Teachers’ Training and Research, Kolkata, West Bengal, India

<sup>d</sup>Equally contributed

---

---

| Particulars                                                                                        | Link                                                                                                                                                                                                                                                        |
|----------------------------------------------------------------------------------------------------|-------------------------------------------------------------------------------------------------------------------------------------------------------------------------------------------------------------------------------------------------------------|
| Details of 44583 proteins                                                                          | <a href="http://www.nittrkol.ac.in/indrajit/projects/COVID-EpitopeVaccine-Global/downloads/supplementary/ProteinSequences.fasta">http://www.nittrkol.ac.in/indrajit/projects/COVID-EpitopeVaccine-Global/downloads/supplementary/ProteinSequences.fasta</a> |
| Details related to 408 CnRs, 85 MHC-I and MHC-II restricted T-cell epitopes and 23 B-cell epitopes | <a href="http://www.nittrkol.ac.in/indrajit/projects/COVID-EpitopeVaccine-Global/downloads/supplementary/Epitope-Details.xlsx">http://www.nittrkol.ac.in/indrajit/projects/COVID-EpitopeVaccine-Global/downloads/supplementary/Epitope-Details.xlsx</a>     |
| List of proposed epitopes from literature                                                          | <a href="http://www.nittrkol.ac.in/indrajit/projects/COVID-EpitopeVaccine-Global/downloads/supplementary/AllPaperSummary.xlsx">http://www.nittrkol.ac.in/indrajit/projects/COVID-EpitopeVaccine-Global/downloads/supplementary/AllPaperSummary.xlsx</a>     |

Table S1: Link of Supplementary excel files

---

\*Corresponding author: [indrajit@nittrkol.ac.in](mailto:indrajit@nittrkol.ac.in)

| Type  | Epitope & Allele         | Web Link                                                                                                                                                                                                                                                                                |
|-------|--------------------------|-----------------------------------------------------------------------------------------------------------------------------------------------------------------------------------------------------------------------------------------------------------------------------------------|
| MHC-I | STFISDEVAR & HLA-A*68:01 | <a href="http://www.nittrkol.ac.in/indrajit/projects/COVID-EpitopeVaccine-Global/downloads/supplementary/PDB/MHC-I/STFISDEVAR-HLA-A-68-01.zip">http://www.nittrkol.ac.in/indrajit/projects/COVID-EpitopeVaccine-Global/downloads/supplementary/PDB/MHC-I/STFISDEVAR-HLA-A-68-01.zip</a> |
|       | DTFCAGSTF & HLA-A*26:01  | <a href="http://www.nittrkol.ac.in/indrajit/projects/COVID-EpitopeVaccine-Global/downloads/supplementary/PDB/MHC-I/DTFCAGSTF-HLA-A-26-01.zip">http://www.nittrkol.ac.in/indrajit/projects/COVID-EpitopeVaccine-Global/downloads/supplementary/PDB/MHC-I/DTFCAGSTF-HLA-A-26-01.zip</a>   |
|       | YTPSKLIEY & HLA-A*26:01  | <a href="http://www.nittrkol.ac.in/indrajit/projects/COVID-EpitopeVaccine-Global/downloads/supplementary/PDB/MHC-I/YTPSKLIEY-HLA-A-26-01.zip">http://www.nittrkol.ac.in/indrajit/projects/COVID-EpitopeVaccine-Global/downloads/supplementary/PDB/MHC-I/YTPSKLIEY-HLA-A-26-01.zip</a>   |
|       | FSAVGNICY & HLA-A*01:01  | <a href="http://www.nittrkol.ac.in/indrajit/projects/COVID-EpitopeVaccine-Global/downloads/supplementary/PDB/MHC-I/FSAVGNICY-HLA-A-01-01.zip">http://www.nittrkol.ac.in/indrajit/projects/COVID-EpitopeVaccine-Global/downloads/supplementary/PDB/MHC-I/FSAVGNICY-HLA-A-01-01.zip</a>   |
|       | TVYDDGARR & HLA-A*68:01  | <a href="http://www.nittrkol.ac.in/indrajit/projects/COVID-EpitopeVaccine-Global/downloads/supplementary/PDB/MHC-I/TVYDDGARR-HLA-A-68-01.zip">http://www.nittrkol.ac.in/indrajit/projects/COVID-EpitopeVaccine-Global/downloads/supplementary/PDB/MHC-I/TVYDDGARR-HLA-A-68-01.zip</a>   |
|       | ILMTARTVY & HLA-B*15:01  | <a href="http://www.nittrkol.ac.in/indrajit/projects/COVID-EpitopeVaccine-Global/downloads/supplementary/PDB/MHC-I/ILMTARTVY-HLA-B-15-01.zip">http://www.nittrkol.ac.in/indrajit/projects/COVID-EpitopeVaccine-Global/downloads/supplementary/PDB/MHC-I/ILMTARTVY-HLA-B-15-01.zip</a>   |
|       | TTAAKLMVV & HLA-A*68:02  | <a href="http://www.nittrkol.ac.in/indrajit/projects/COVID-EpitopeVaccine-Global/downloads/supplementary/PDB/MHC-I/TTAAKLMVV-HLA-A-68-02.zip">http://www.nittrkol.ac.in/indrajit/projects/COVID-EpitopeVaccine-Global/downloads/supplementary/PDB/MHC-I/TTAAKLMVV-HLA-A-68-02.zip</a>   |
|       | NIPLTTAAK & HLA-A*68:01  | <a href="http://www.nittrkol.ac.in/indrajit/projects/COVID-EpitopeVaccine-Global/downloads/supplementary/PDB/MHC-I/NIPLTTAAK-HLA-A-68-01.zip">http://www.nittrkol.ac.in/indrajit/projects/COVID-EpitopeVaccine-Global/downloads/supplementary/PDB/MHC-I/NIPLTTAAK-HLA-A-68-01.zip</a>   |
|       | VENPDILRVY & HLA-B*44:03 | <a href="http://www.nittrkol.ac.in/indrajit/projects/COVID-EpitopeVaccine-Global/downloads/supplementary/PDB/MHC-I/VENPDILRVY-HLA-B-44-03.zip">http://www.nittrkol.ac.in/indrajit/projects/COVID-EpitopeVaccine-Global/downloads/supplementary/PDB/MHC-I/VENPDILRVY-HLA-B-44-03.zip</a> |
|       | RVYANLGER & HLA-A*31:01  | <a href="http://www.nittrkol.ac.in/indrajit/projects/COVID-EpitopeVaccine-Global/downloads/supplementary/PDB/MHC-I/RVYANLGER-HLA-A-31-01.zip">http://www.nittrkol.ac.in/indrajit/projects/COVID-EpitopeVaccine-Global/downloads/supplementary/PDB/MHC-I/RVYANLGER-HLA-A-31-01.zip</a>   |
|       | DTDFVNEFY & HLA-A*01:01  | <a href="http://www.nittrkol.ac.in/indrajit/projects/COVID-EpitopeVaccine-Global/downloads/supplementary/PDB/MHC-I/DTDFVNEFY-HLA-A-01-01.zip">http://www.nittrkol.ac.in/indrajit/projects/COVID-EpitopeVaccine-Global/downloads/supplementary/PDB/MHC-I/DTDFVNEFY-HLA-A-01-01.zip</a>   |
|       | YVFTGYRVTK & HLA-A*68:01 | <a href="http://www.nittrkol.ac.in/indrajit/projects/COVID-EpitopeVaccine-Global/downloads/supplementary/PDB/MHC-I/YVFTGYRVTK-HLA-A-68-01.zip">http://www.nittrkol.ac.in/indrajit/projects/COVID-EpitopeVaccine-Global/downloads/supplementary/PDB/MHC-I/YVFTGYRVTK-HLA-A-68-01.zip</a> |
|       | KVNSTLEQY & HLA-A*30:02  | <a href="http://www.nittrkol.ac.in/indrajit/projects/COVID-EpitopeVaccine-Global/downloads/supplementary/PDB/MHC-I/KVNSTLEQY-HLA-A-30-02.zip">http://www.nittrkol.ac.in/indrajit/projects/COVID-EpitopeVaccine-Global/downloads/supplementary/PDB/MHC-I/KVNSTLEQY-HLA-A-30-02.zip</a>   |
|       | IPARARVECF & HLA-B*07:02 | <a href="http://www.nittrkol.ac.in/indrajit/projects/COVID-EpitopeVaccine-Global/downloads/supplementary/PDB/MHC-I/IPARARVECF-HLA-B-07-02.zip">http://www.nittrkol.ac.in/indrajit/projects/COVID-EpitopeVaccine-Global/downloads/supplementary/PDB/MHC-I/IPARARVECF-HLA-B-07-02.zip</a> |
|       | KSAQCFKMF & HLA-B*57:01  | <a href="http://www.nittrkol.ac.in/indrajit/projects/COVID-EpitopeVaccine-Global/downloads/supplementary/PDB/MHC-I/KSAQCFKMF-HLA-B-57-01.zip">http://www.nittrkol.ac.in/indrajit/projects/COVID-EpitopeVaccine-Global/downloads/supplementary/PDB/MHC-I/KSAQCFKMF-HLA-B-57-01.zip</a>   |
|       | KSAQCFKMFY & HLA-B*57:01 | <a href="http://www.nittrkol.ac.in/indrajit/projects/COVID-EpitopeVaccine-Global/downloads/supplementary/PDB/MHC-I/KSAQCFKMFY-HLA-B-57-01.zip">http://www.nittrkol.ac.in/indrajit/projects/COVID-EpitopeVaccine-Global/downloads/supplementary/PDB/MHC-I/KSAQCFKMFY-HLA-B-57-01.zip</a> |
|       | DAPAHISTI & HLA-B*51:01  | <a href="http://www.nittrkol.ac.in/indrajit/projects/COVID-EpitopeVaccine-Global/downloads/supplementary/PDB/MHC-I/DAPAHISTI-HLA-B-51-01.zip">http://www.nittrkol.ac.in/indrajit/projects/COVID-EpitopeVaccine-Global/downloads/supplementary/PDB/MHC-I/DAPAHISTI-HLA-B-51-01.zip</a>   |
|       | NTVIWYDKR & HLA-A*68:01  | <a href="http://www.nittrkol.ac.in/indrajit/projects/COVID-EpitopeVaccine-Global/downloads/supplementary/PDB/MHC-I/NTVIWYDKR-HLA-A-68-01.zip">http://www.nittrkol.ac.in/indrajit/projects/COVID-EpitopeVaccine-Global/downloads/supplementary/PDB/MHC-I/NTVIWYDKR-HLA-A-68-01.zip</a>   |
|       | KYTLQCQYL & HLA-A*24:02  | <a href="http://www.nittrkol.ac.in/indrajit/projects/COVID-EpitopeVaccine-Global/downloads/supplementary/PDB/MHC-I/KYTLQCQYL-HLA-A-24-02.zip">http://www.nittrkol.ac.in/indrajit/projects/COVID-EpitopeVaccine-Global/downloads/supplementary/PDB/MHC-I/KYTLQCQYL-HLA-A-24-02.zip</a>   |
|       | EILPVSMTK & HLA-A*68:01  | <a href="http://www.nittrkol.ac.in/indrajit/projects/COVID-EpitopeVaccine-Global/downloads/supplementary/PDB/MHC-I/EILPVSMTK-HLA-A-68-01.zip">http://www.nittrkol.ac.in/indrajit/projects/COVID-EpitopeVaccine-Global/downloads/supplementary/PDB/MHC-I/EILPVSMTK-HLA-A-68-01.zip</a>   |
|       | ALNTLVKQL & HLA-A*02:03  | <a href="http://www.nittrkol.ac.in/indrajit/projects/COVID-EpitopeVaccine-Global/downloads/supplementary/PDB/MHC-I/ALNTLVKQL-HLA-A-02-03.zip">http://www.nittrkol.ac.in/indrajit/projects/COVID-EpitopeVaccine-Global/downloads/supplementary/PDB/MHC-I/ALNTLVKQL-HLA-A-02-03.zip</a>   |
|       | NAQALNTLV & HLA-B*51:01  | <a href="http://www.nittrkol.ac.in/indrajit/projects/COVID-EpitopeVaccine-Global/downloads/supplementary/PDB/MHC-I/NAQALNTLV-HLA-B-51-01.zip">http://www.nittrkol.ac.in/indrajit/projects/COVID-EpitopeVaccine-Global/downloads/supplementary/PDB/MHC-I/NAQALNTLV-HLA-B-51-01.zip</a>   |
|       | FTSDYQYLY & HLA-A*01:01  | <a href="http://www.nittrkol.ac.in/indrajit/projects/COVID-EpitopeVaccine-Global/downloads/supplementary/PDB/MHC-I/FTSDYQYLY-HLA-A-01-01.zip">http://www.nittrkol.ac.in/indrajit/projects/COVID-EpitopeVaccine-Global/downloads/supplementary/PDB/MHC-I/FTSDYQYLY-HLA-A-01-01.zip</a>   |
|       | YYQLYSTQL & HLA-A*24:02  | <a href="http://www.nittrkol.ac.in/indrajit/projects/COVID-EpitopeVaccine-Global/downloads/supplementary/PDB/MHC-I/YYQLYSTQL-HLA-A-24-02.zip">http://www.nittrkol.ac.in/indrajit/projects/COVID-EpitopeVaccine-Global/downloads/supplementary/PDB/MHC-I/YYQLYSTQL-HLA-A-24-02.zip</a>   |
|       | KLLEQWNLV & HLA-A*02:01  | <a href="http://www.nittrkol.ac.in/indrajit/projects/COVID-EpitopeVaccine-Global/downloads/supplementary/PDB/MHC-I/KLLEQWNLV-HLA-A-02-01.zip">http://www.nittrkol.ac.in/indrajit/projects/COVID-EpitopeVaccine-Global/downloads/supplementary/PDB/MHC-I/KLLEQWNLV-HLA-A-02-01.zip</a>   |
|       | VIGFLFLTW & HLA-B*57:01  | <a href="http://www.nittrkol.ac.in/indrajit/projects/COVID-EpitopeVaccine-Global/downloads/supplementary/PDB/MHC-I/VIGFLFLTW-HLA-A-01-01.zip">http://www.nittrkol.ac.in/indrajit/projects/COVID-EpitopeVaccine-Global/downloads/supplementary/PDB/MHC-I/VIGFLFLTW-HLA-A-01-01.zip</a>   |
|       | SSDNIALLV & HLA-A*01:01  | <a href="http://www.nittrkol.ac.in/indrajit/projects/COVID-EpitopeVaccine-Global/downloads/supplementary/PDB/MHC-I/SSDNIALLV-HLA-A-01-01.zip">http://www.nittrkol.ac.in/indrajit/projects/COVID-EpitopeVaccine-Global/downloads/supplementary/PDB/MHC-I/SSDNIALLV-HLA-A-01-01.zip</a>   |
|       | SSDNIALL & HLA-A*68:02   | <a href="http://www.nittrkol.ac.in/indrajit/projects/COVID-EpitopeVaccine-Global/downloads/supplementary/PDB/MHC-I/SSDNIALL-HLA-A-68-02.zip">http://www.nittrkol.ac.in/indrajit/projects/COVID-EpitopeVaccine-Global/downloads/supplementary/PDB/MHC-I/SSDNIALL-HLA-A-68-02.zip</a>     |
|       | GYRRATRR & HLA-A*31:01   | <a href="http://www.nittrkol.ac.in/indrajit/projects/COVID-EpitopeVaccine-Global/downloads/supplementary/PDB/MHC-I/GYRRATRR-HLA-A-31-01.zip">http://www.nittrkol.ac.in/indrajit/projects/COVID-EpitopeVaccine-Global/downloads/supplementary/PDB/MHC-I/GYRRATRR-HLA-A-31-01.zip</a>     |
|       | IGYRRATR & HLA-A*31:01   | <a href="http://www.nittrkol.ac.in/indrajit/projects/COVID-EpitopeVaccine-Global/downloads/supplementary/PDB/MHC-I/IGYRRATR-HLA-A-31-01.zip">http://www.nittrkol.ac.in/indrajit/projects/COVID-EpitopeVaccine-Global/downloads/supplementary/PDB/MHC-I/IGYRRATR-HLA-A-31-01.zip</a>     |

Table S2: Docked PDB structures of MHC-I restricted T-cell epitopes

| Type   | Epitope & Allele                             | Web Link                                                                                                                                                                                                                                                                                                                          |
|--------|----------------------------------------------|-----------------------------------------------------------------------------------------------------------------------------------------------------------------------------------------------------------------------------------------------------------------------------------------------------------------------------------|
| MHC-II | FCAGSTFISDEVAR & HLA-DRB3*01:01              | <a href="http://www.nittrkol.ac.in/indrajit/projects/COVID-EpitopeVaccine-Global/downloads/supplementary/PDB/MHC-II/FCAGSTFISDEVAR-HLA-DRB3-01-01.zip">http://www.nittrkol.ac.in/indrajit/projects/COVID-EpitopeVaccine-Global/downloads/supplementary/PDB/MHC-II/FCAGSTFISDEVAR-HLA-DRB3-01-01.zip</a>                           |
|        | DTFCAGSTFISDEA & HLA-DQA1*03:01/DQB1*03:02   | <a href="http://www.nittrkol.ac.in/indrajit/projects/COVID-EpitopeVaccine-Global/downloads/supplementary/PDB/MHC-II/DTFCAGSTFISDEA-HLA-DQA1-03-01/DQB1-03-02.zip">http://www.nittrkol.ac.in/indrajit/projects/COVID-EpitopeVaccine-Global/downloads/supplementary/PDB/MHC-II/DTFCAGSTFISDEA-HLA-DQA1-03-01/DQB1-03-02.zip</a>     |
|        | VGNYCYTPSKLIEY & HLA-DRB1*07:01              | <a href="http://www.nittrkol.ac.in/indrajit/projects/COVID-EpitopeVaccine-Global/downloads/supplementary/PDB/MHC-II/VGNYCYTPSKLIEY-HLA-DRB1-07-01.zip">http://www.nittrkol.ac.in/indrajit/projects/COVID-EpitopeVaccine-Global/downloads/supplementary/PDB/MHC-II/VGNYCYTPSKLIEY-HLA-DRB1-07-01.zip</a>                           |
|        | ASAVLLILMTARTV & HLA-DRB1*01:01              | <a href="http://www.nittrkol.ac.in/indrajit/projects/COVID-EpitopeVaccine-Global/downloads/supplementary/PDB/MHC-II/ASAVLLILMTARTV-HLA-DRB1-01-01.zip">http://www.nittrkol.ac.in/indrajit/projects/COVID-EpitopeVaccine-Global/downloads/supplementary/PDB/MHC-II/ASAVLLILMTARTV-HLA-DRB1-01-01.zip</a>                           |
|        | LNIPLTTAAKLMVV & HLA-DRB1*08:02              | <a href="http://www.nittrkol.ac.in/indrajit/projects/COVID-EpitopeVaccine-Global/downloads/supplementary/PDB/MHC-II/LNIPLTTAAKLMVV-HLA-DRB1-08-02.zip">http://www.nittrkol.ac.in/indrajit/projects/COVID-EpitopeVaccine-Global/downloads/supplementary/PDB/MHC-II/LNIPLTTAAKLMVV-HLA-DRB1-08-02.zip</a>                           |
|        | ILRVYANLGERVQA & HLA-DRB3*02:02              | <a href="http://www.nittrkol.ac.in/indrajit/projects/COVID-EpitopeVaccine-Global/downloads/supplementary/PDB/MHC-II/ILRVYANLGERVQA-HLA-DRB3-02-02.zip">http://www.nittrkol.ac.in/indrajit/projects/COVID-EpitopeVaccine-Global/downloads/supplementary/PDB/MHC-II/ILRVYANLGERVQA-HLA-DRB3-02-02.zip</a>                           |
|        | RNRDVTDFVNEFY & HLA-DQA1*01:01/DQB1*05:01    | <a href="http://www.nittrkol.ac.in/indrajit/projects/COVID-EpitopeVaccine-Global/downloads/supplementary/PDB/MHC-II/RNRDVTDFVNEFY-HLA-DQA1-01-01/DQB1-05-01.zip">http://www.nittrkol.ac.in/indrajit/projects/COVID-EpitopeVaccine-Global/downloads/supplementary/PDB/MHC-II/RNRDVTDFVNEFY-HLA-DQA1-01-01/DQB1-05-01.zip</a>       |
|        | YRNRDVTDFVNEFY & HLA-DQA1*01:01/DQB1*05:01   | <a href="http://www.nittrkol.ac.in/indrajit/projects/COVID-EpitopeVaccine-Global/downloads/supplementary/PDB/MHC-II/YRNRDVTDFVNEFY-HLA-DQA1-01-01/DQB1-05-01.zip">http://www.nittrkol.ac.in/indrajit/projects/COVID-EpitopeVaccine-Global/downloads/supplementary/PDB/MHC-II/YRNRDVTDFVNEFY-HLA-DQA1-01-01/DQB1-05-01.zip</a>     |
|        | NYVFTGYRVTKNSKV & HLA-DRB1*07:01             | <a href="http://www.nittrkol.ac.in/indrajit/projects/COVID-EpitopeVaccine-Global/downloads/supplementary/PDB/MHC-II/NYVFTGYRVTKNSKV-HLA-DRB1-07-01.zip">http://www.nittrkol.ac.in/indrajit/projects/COVID-EpitopeVaccine-Global/downloads/supplementary/PDB/MHC-II/NYVFTGYRVTKNSKV-HLA-DRB1-07-01.zip</a>                         |
|        | ECFDKFKVNSTLEQY & HLA-DRB3*02:02             | <a href="http://www.nittrkol.ac.in/indrajit/projects/COVID-EpitopeVaccine-Global/downloads/supplementary/PDB/MHC-II/ECFDKFKVNSTLEQY-HLA-DRB3-02-02.zip">http://www.nittrkol.ac.in/indrajit/projects/COVID-EpitopeVaccine-Global/downloads/supplementary/PDB/MHC-II/ECFDKFKVNSTLEQY-HLA-DRB3-02-02.zip</a>                         |
|        | KCSRIIPARARVECF & HLA-DPA1*02:01/DPB1*14:01  | <a href="http://www.nittrkol.ac.in/indrajit/projects/COVID-EpitopeVaccine-Global/downloads/supplementary/PDB/MHC-II/KCSRIIPARARVECF-HLA-DPA1-02-01/DPB1-14-01.zip">http://www.nittrkol.ac.in/indrajit/projects/COVID-EpitopeVaccine-Global/downloads/supplementary/PDB/MHC-II/KCSRIIPARARVECF-HLA-DPA1-02-01/DPB1-14-01.zip</a>   |
|        | AHKDKSAQCFKMFYK & HLA-DPA1*02:01/DPB1*05:01  | <a href="http://www.nittrkol.ac.in/indrajit/projects/COVID-EpitopeVaccine-Global/downloads/supplementary/PDB/MHC-II/AHKDKSAQCFKMFYK-HLA-DPA1-02-01/DPB1-05-01.zip">http://www.nittrkol.ac.in/indrajit/projects/COVID-EpitopeVaccine-Global/downloads/supplementary/PDB/MHC-II/AHKDKSAQCFKMFYK-HLA-DPA1-02-01/DPB1-05-01.zip</a>   |
|        | IWDYKRDPAHISTI & HLA-DRB3*01:01              | <a href="http://www.nittrkol.ac.in/indrajit/projects/COVID-EpitopeVaccine-Global/downloads/supplementary/PDB/MHC-II/IWDYKRDPAHISTI-HLA-DRB3-01-01.zip">http://www.nittrkol.ac.in/indrajit/projects/COVID-EpitopeVaccine-Global/downloads/supplementary/PDB/MHC-II/IWDYKRDPAHISTI-HLA-DRB3-01-01.zip</a>                           |
|        | WDYKRDPAHISTIG & HLA-DRB3*01:01              | <a href="http://www.nittrkol.ac.in/indrajit/projects/COVID-EpitopeVaccine-Global/downloads/supplementary/PDB/MHC-II/WDYKRDPAHISTIG-HLA-DRB3-01-01.zip">http://www.nittrkol.ac.in/indrajit/projects/COVID-EpitopeVaccine-Global/downloads/supplementary/PDB/MHC-II/WDYKRDPAHISTIG-HLA-DRB3-01-01.zip</a>                           |
|        | PKGIMMNVAKYQQLC & HLA-DRB3*02:02             | <a href="http://www.nittrkol.ac.in/indrajit/projects/COVID-EpitopeVaccine-Global/downloads/supplementary/PDB/MHC-II/PKGIMMNVAKYQQLC-HLA-DRB3-02-02.zip">http://www.nittrkol.ac.in/indrajit/projects/COVID-EpitopeVaccine-Global/downloads/supplementary/PDB/MHC-II/PKGIMMNVAKYQQLC-HLA-DRB3-02-02.zip</a>                         |
|        | PVSMTKTSDVCTMYI & HLA-DRB3*01:01             | <a href="http://www.nittrkol.ac.in/indrajit/projects/COVID-EpitopeVaccine-Global/downloads/supplementary/PDB/MHC-II/PVSMTKTSDVCTMYI-HLA-DRB3-01-01.zip">http://www.nittrkol.ac.in/indrajit/projects/COVID-EpitopeVaccine-Global/downloads/supplementary/PDB/MHC-II/PVSMTKTSDVCTMYI-HLA-DRB3-01-01.zip</a>                         |
|        | TEILPVSMTKTSDVDC & HLA-DRB1*08:02            | <a href="http://www.nittrkol.ac.in/indrajit/projects/COVID-EpitopeVaccine-Global/downloads/supplementary/PDB/MHC-II/TEILPVSMTKTSDVDC-HLA-DRB1-08-02.zip">http://www.nittrkol.ac.in/indrajit/projects/COVID-EpitopeVaccine-Global/downloads/supplementary/PDB/MHC-II/TEILPVSMTKTSDVDC-HLA-DRB1-08-02.zip</a>                       |
|        | QDVVNQNAQALNTLV & HLA-DRB1*13:02             | <a href="http://www.nittrkol.ac.in/indrajit/projects/COVID-EpitopeVaccine-Global/downloads/supplementary/PDB/MHC-II/QDVVNQNAQALNTLV-HLA-DRB1-13-02.zip">http://www.nittrkol.ac.in/indrajit/projects/COVID-EpitopeVaccine-Global/downloads/supplementary/PDB/MHC-II/QDVVNQNAQALNTLV-HLA-DRB1-13-02.zip</a>                         |
|        | DVNVNNAQALNTLVK & HLA-DRB1*13:02             | <a href="http://www.nittrkol.ac.in/indrajit/projects/COVID-EpitopeVaccine-Global/downloads/supplementary/PDB/MHC-II/DVNVNNAQALNTLVK-HLA-DRB1-13-02.zip">http://www.nittrkol.ac.in/indrajit/projects/COVID-EpitopeVaccine-Global/downloads/supplementary/PDB/MHC-II/DVNVNNAQALNTLVK-HLA-DRB1-13-02.zip</a>                         |
|        | LHSYFTSDYQYLYSTQ & HLA-DPA1*01:03/DPB1*04:01 | <a href="http://www.nittrkol.ac.in/indrajit/projects/COVID-EpitopeVaccine-Global/downloads/supplementary/PDB/MHC-II/LHSYFTSDYQYLYSTQ-HLA-DPA1-01-03/DPB1-04-01.zip">http://www.nittrkol.ac.in/indrajit/projects/COVID-EpitopeVaccine-Global/downloads/supplementary/PDB/MHC-II/LHSYFTSDYQYLYSTQ-HLA-DPA1-01-03/DPB1-04-01.zip</a> |
|        | HSYFTSDYQYLYSTQ & HLA-DPA1*01:03/DPB1*04:01  | <a href="http://www.nittrkol.ac.in/indrajit/projects/COVID-EpitopeVaccine-Global/downloads/supplementary/PDB/MHC-II/HSYFTSDYQYLYSTQ-HLA-DPA1-01-03/DPB1-04-01.zip">http://www.nittrkol.ac.in/indrajit/projects/COVID-EpitopeVaccine-Global/downloads/supplementary/PDB/MHC-II/HSYFTSDYQYLYSTQ-HLA-DPA1-01-03/DPB1-04-01.zip</a>   |
|        | WNLVIGFLFLTWICL & HLA-DPA1*01:03/DPB1*02:01  | <a href="http://www.nittrkol.ac.in/indrajit/projects/COVID-EpitopeVaccine-Global/downloads/supplementary/PDB/MHC-II/WNLVIGFLFLTWICL-HLA-DPA1-01-03/DPB1-02-01.zip">http://www.nittrkol.ac.in/indrajit/projects/COVID-EpitopeVaccine-Global/downloads/supplementary/PDB/MHC-II/WNLVIGFLFLTWICL-HLA-DPA1-01-03/DPB1-02-01.zip</a>   |
|        | NYKLNTDHSSSDNI & HLA-DRB3*02:02              | <a href="http://www.nittrkol.ac.in/indrajit/projects/COVID-EpitopeVaccine-Global/downloads/supplementary/PDB/MHC-II/NYKLNTDHSSSDNI-HLA-DRB3-02-02.zip">http://www.nittrkol.ac.in/indrajit/projects/COVID-EpitopeVaccine-Global/downloads/supplementary/PDB/MHC-II/NYKLNTDHSSSDNI-HLA-DRB3-02-02.zip</a>                           |
|        | IGYRRATRRIRGGD & HLA-DRB1*11:01              | <a href="http://www.nittrkol.ac.in/indrajit/projects/COVID-EpitopeVaccine-Global/downloads/supplementary/PDB/MHC-II/IGYRRATRRIRGGD-HLA-DRB1-11-01.zip">http://www.nittrkol.ac.in/indrajit/projects/COVID-EpitopeVaccine-Global/downloads/supplementary/PDB/MHC-II/IGYRRATRRIRGGD-HLA-DRB1-11-01.zip</a>                           |

Table S3: Docked PDB structures of MHC-II restricted T-cell epitopes

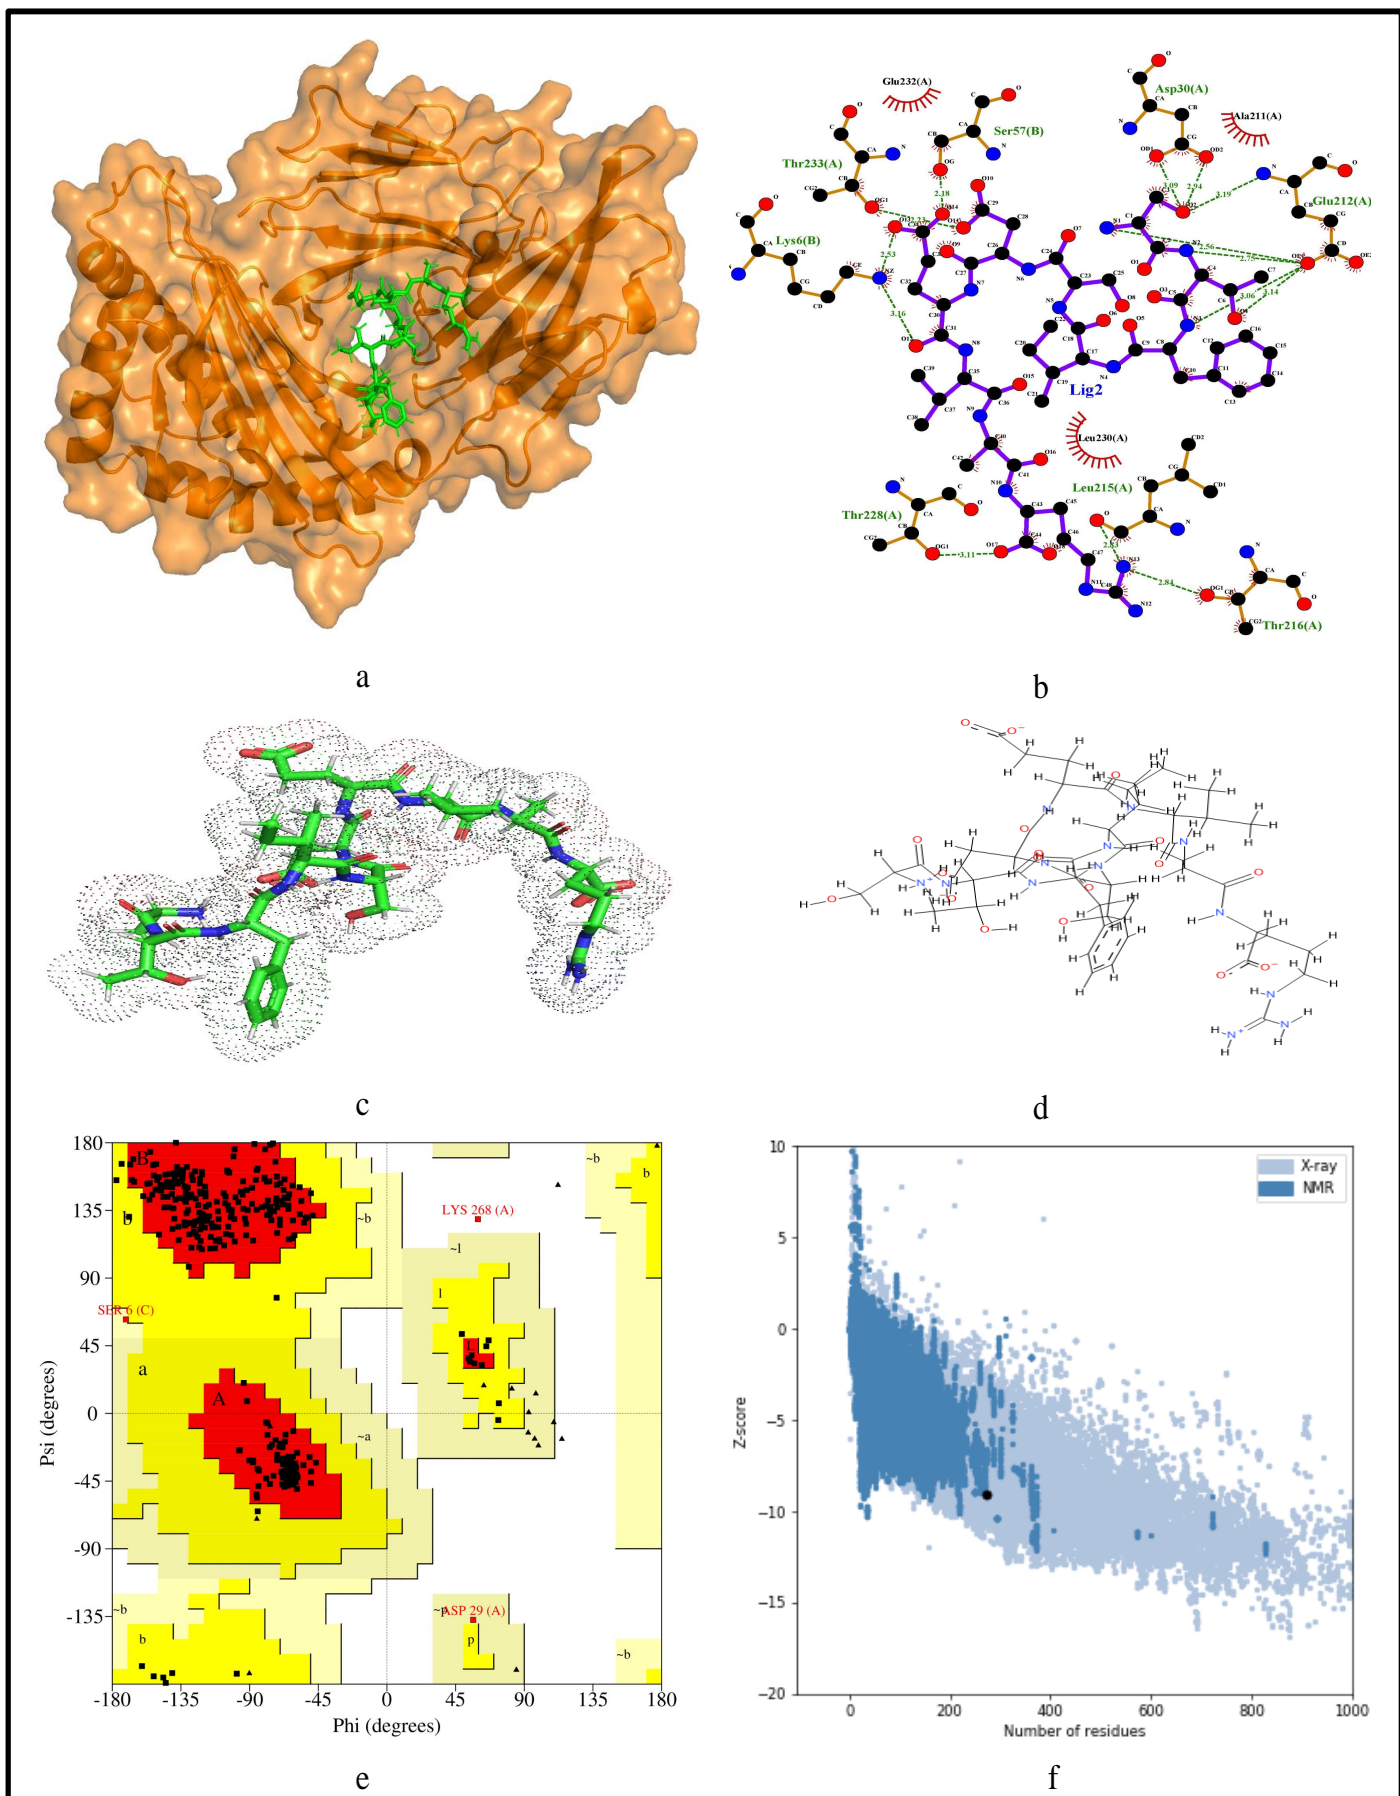

Figure S1: Structural analysis for MHC-I restricted T-cell epitope "STFISDEVAR" (a) Docking structure of MHC-I restricted T-cell epitope (b) 2D pose representation between the epitope and HLA allele showing the different non-covalent bonds (c) 3D structure of the epitope (d) Chemical structure of the epitope (e) Ramachandran plot of the epitope allele structure showing lower energy sites of the residues in different frames and (f) Z-Score plot

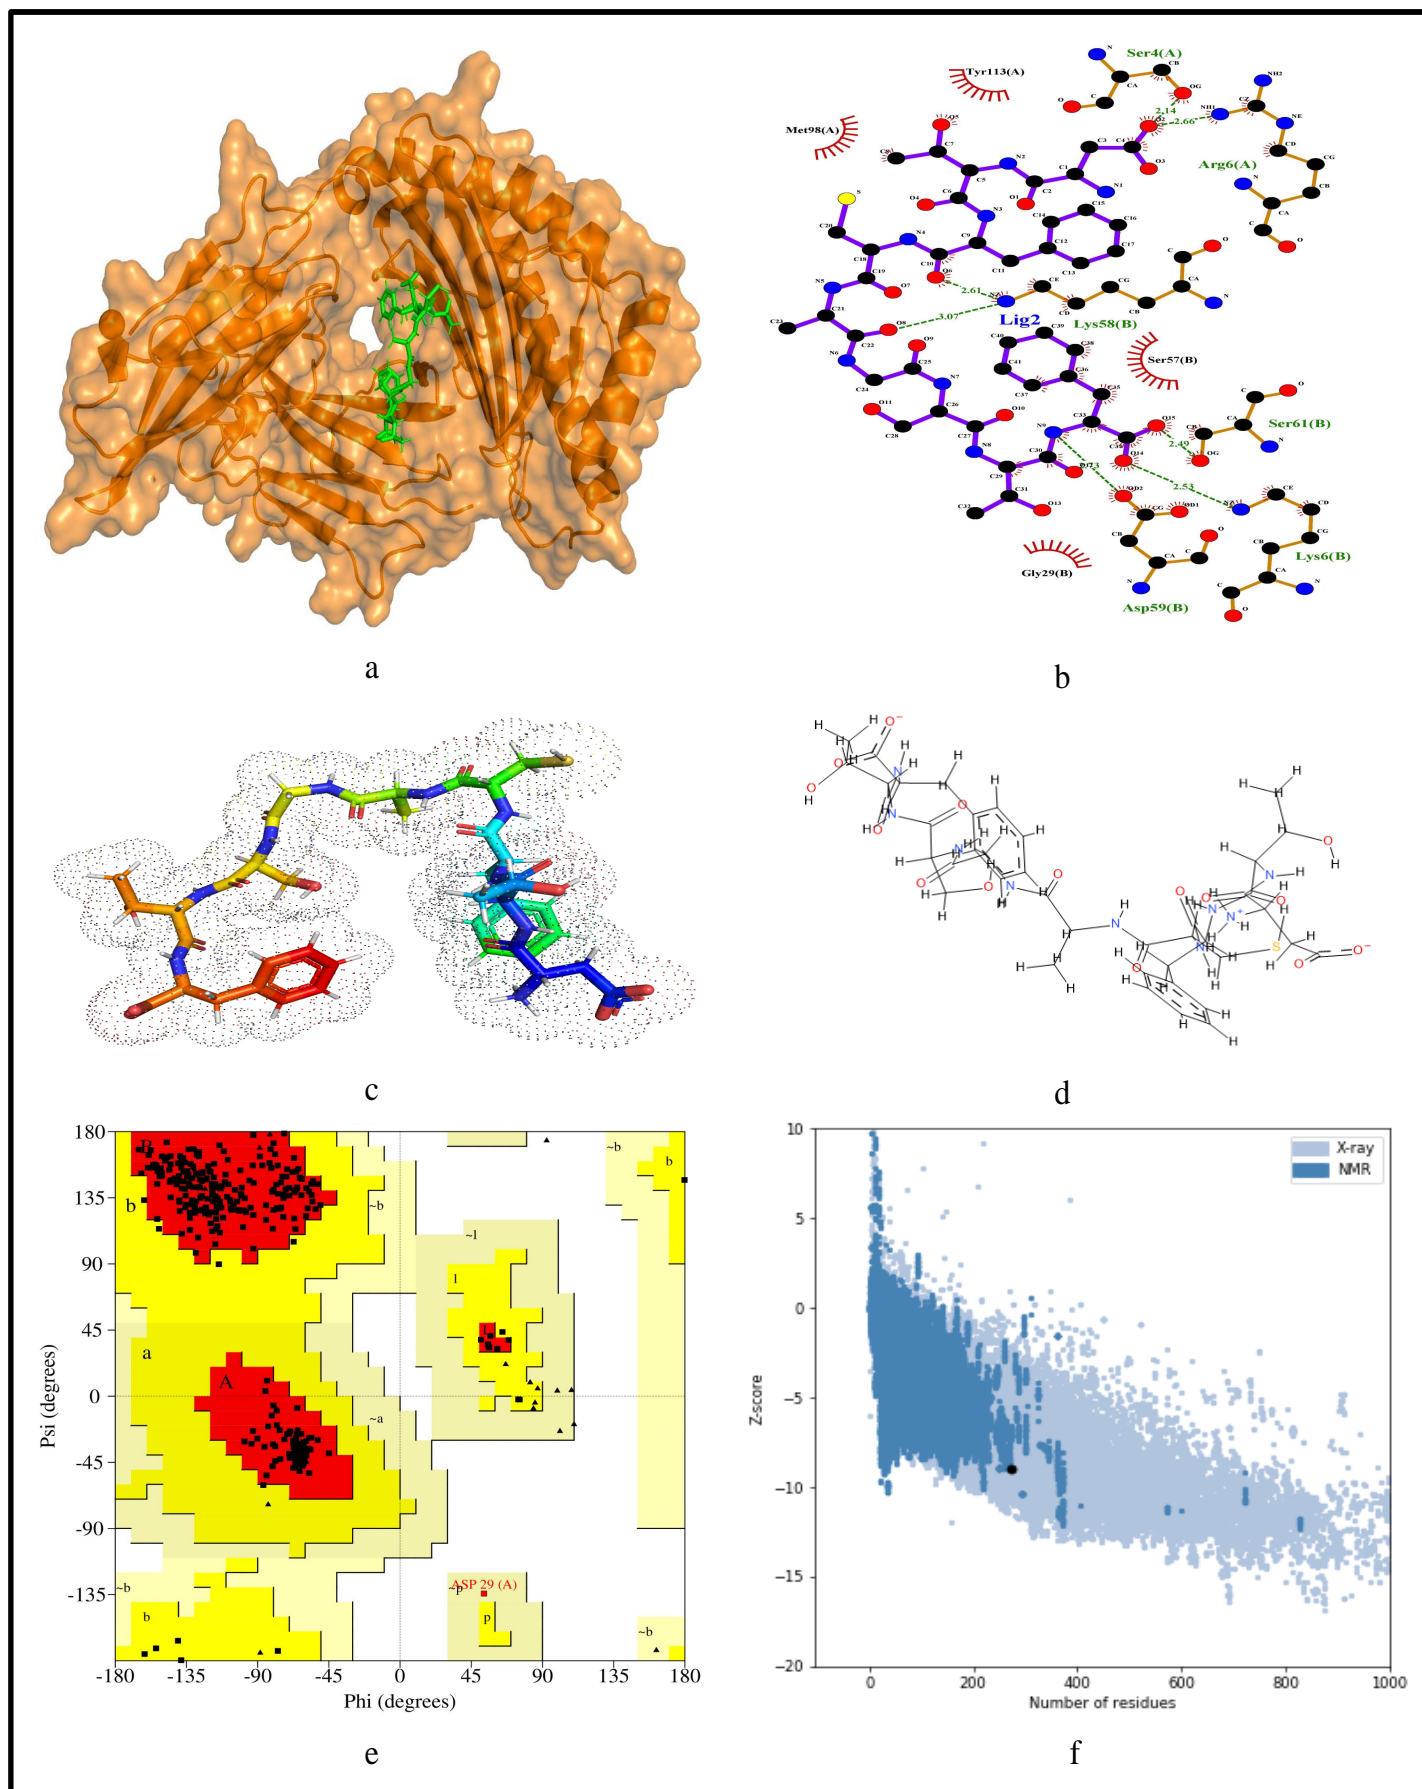

Figure S2: Structural analysis for MHC-I restricted T-cell epitope "DTFCAGSTF" (a) Docking structure of MHC-I restricted T-cell epitope (b) 2D pose representation between the epitope and HLA allele showing the different non-covalent bonds (c) 3D structure of the epitope (d) Chemical structure of the epitope (e) Ramachandran plot of the epitope allele structure showing lower energy sites of the residues in different frames and (f) Z-Score plot

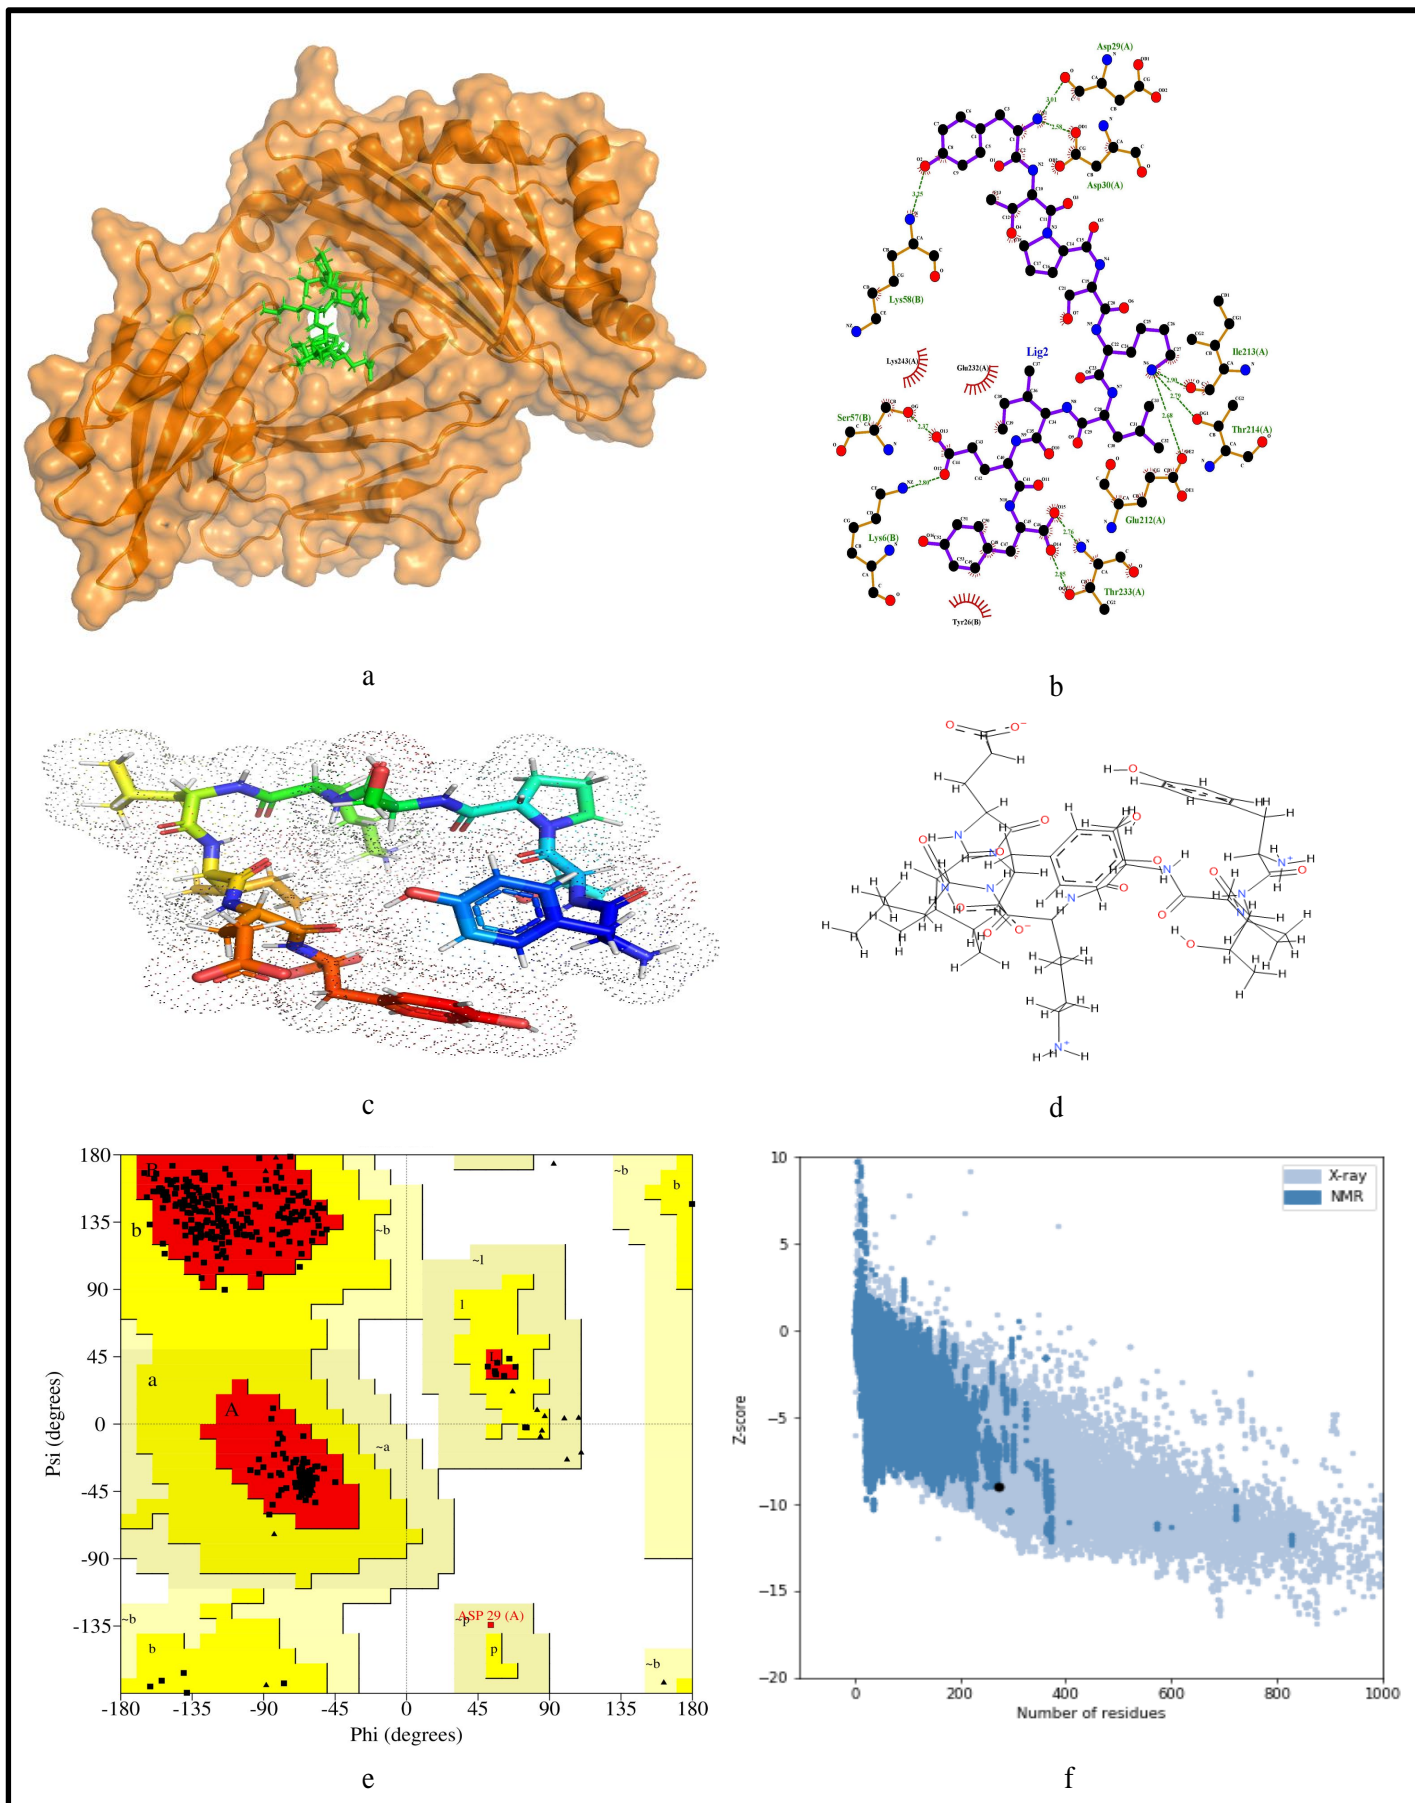

Figure S3: Structural analysis for MHC-I restricted T-cell epitope "YTPSKLIEY" (a) Docking structure of MHC-I restricted T-cell epitope (b) 2D pose representation between the epitope and HLA allele showing the different non-covalent bonds (c) 3D structure of the epitope (d) Chemical structure of the epitope (e) Ramachandran plot of the epitope allele structure showing lower energy sites of the residues in different frames and (f) Z-Score plot

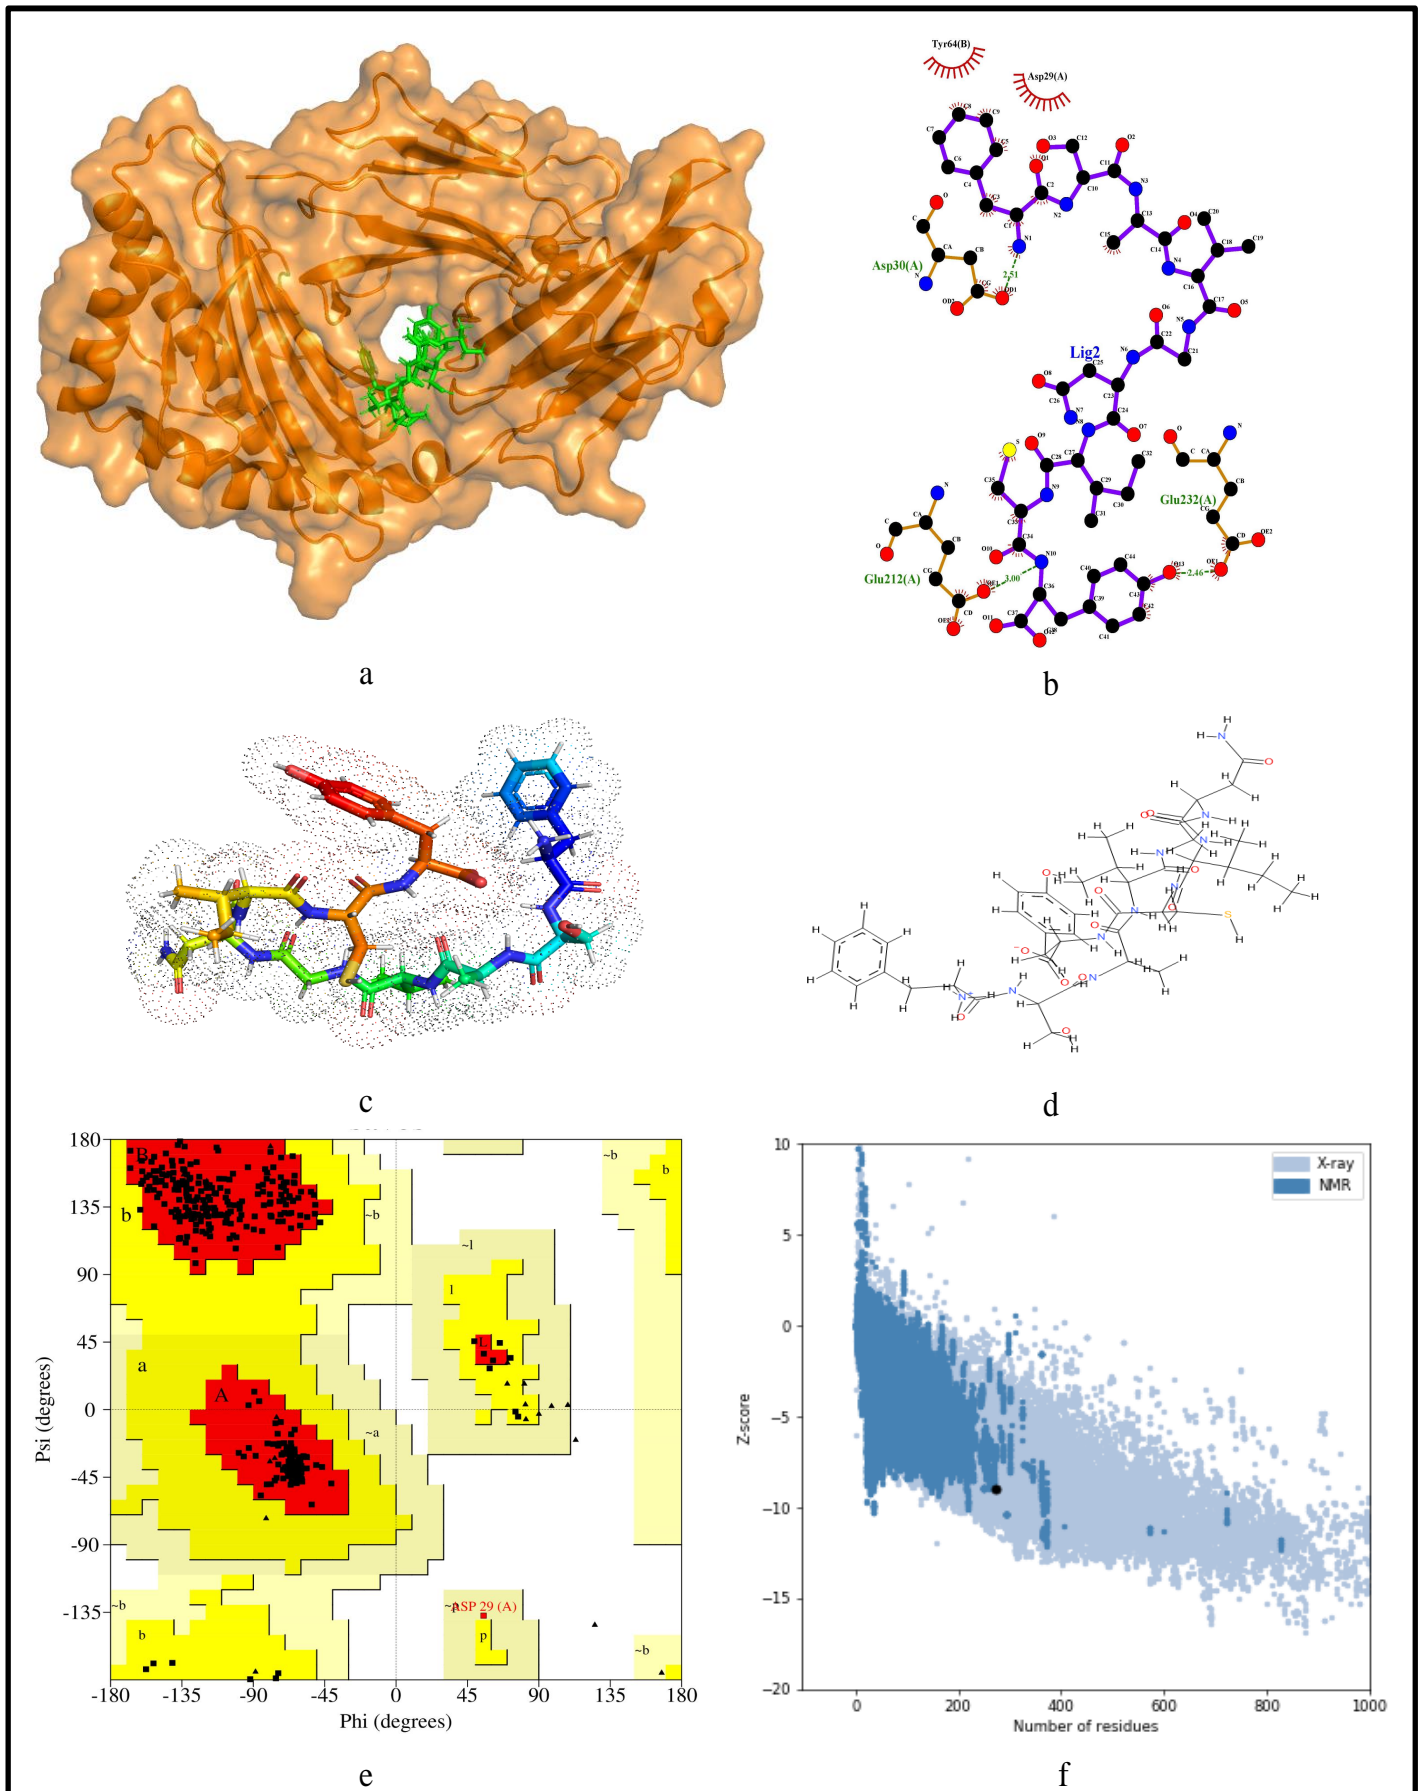

Figure S4: Structural analysis for MHC-I restricted T-cell epitope "FSAVGNICY" (a) Docking structure of MHC-I restricted T-cell epitope (b) 2D pose representation between the epitope and HLA allele showing the different non-covalent bonds (c) 3D structure of the epitope (d) Chemical structure of the epitope (e) Ramachandran plot of the epitope allele structure showing lower energy sites of the residues in different frames and (f) Z-Score plot

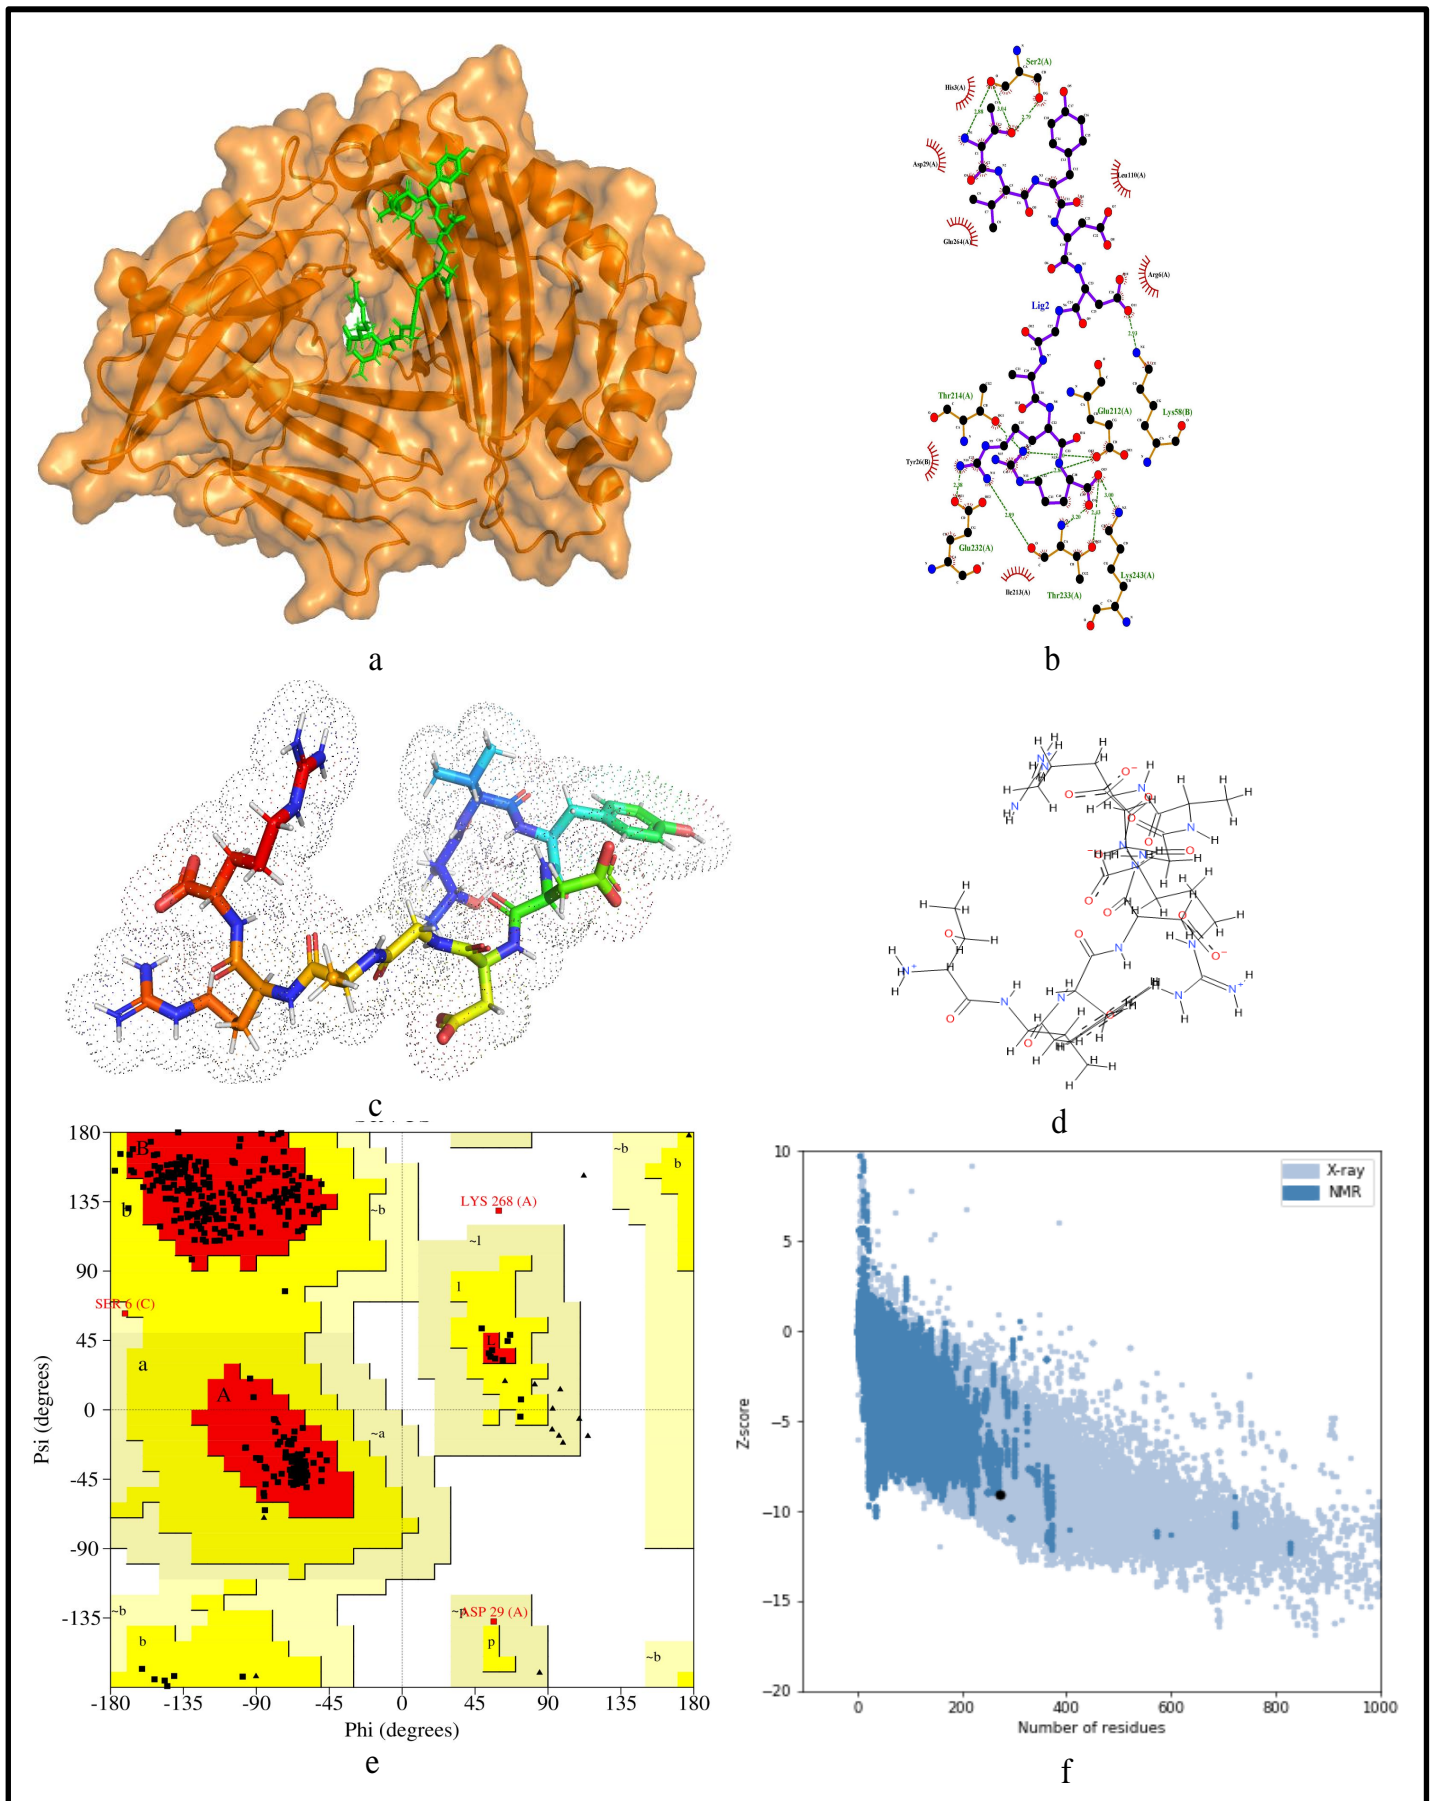

Figure S5: Structural analysis for MHC-I restricted T-cell epitope "TVYDDGARR" (a) Docking structure of MHC-I restricted T-cell epitope (b) 2D pose representation between the epitope and HLA allele showing the different non-covalent bonds (c) 3D structure of the epitope (d) Chemical structure of the epitope (e) Ramachandran plot of the epitope allele structure showing lower energy sites of the residues in different frames and (f) Z-Score plot

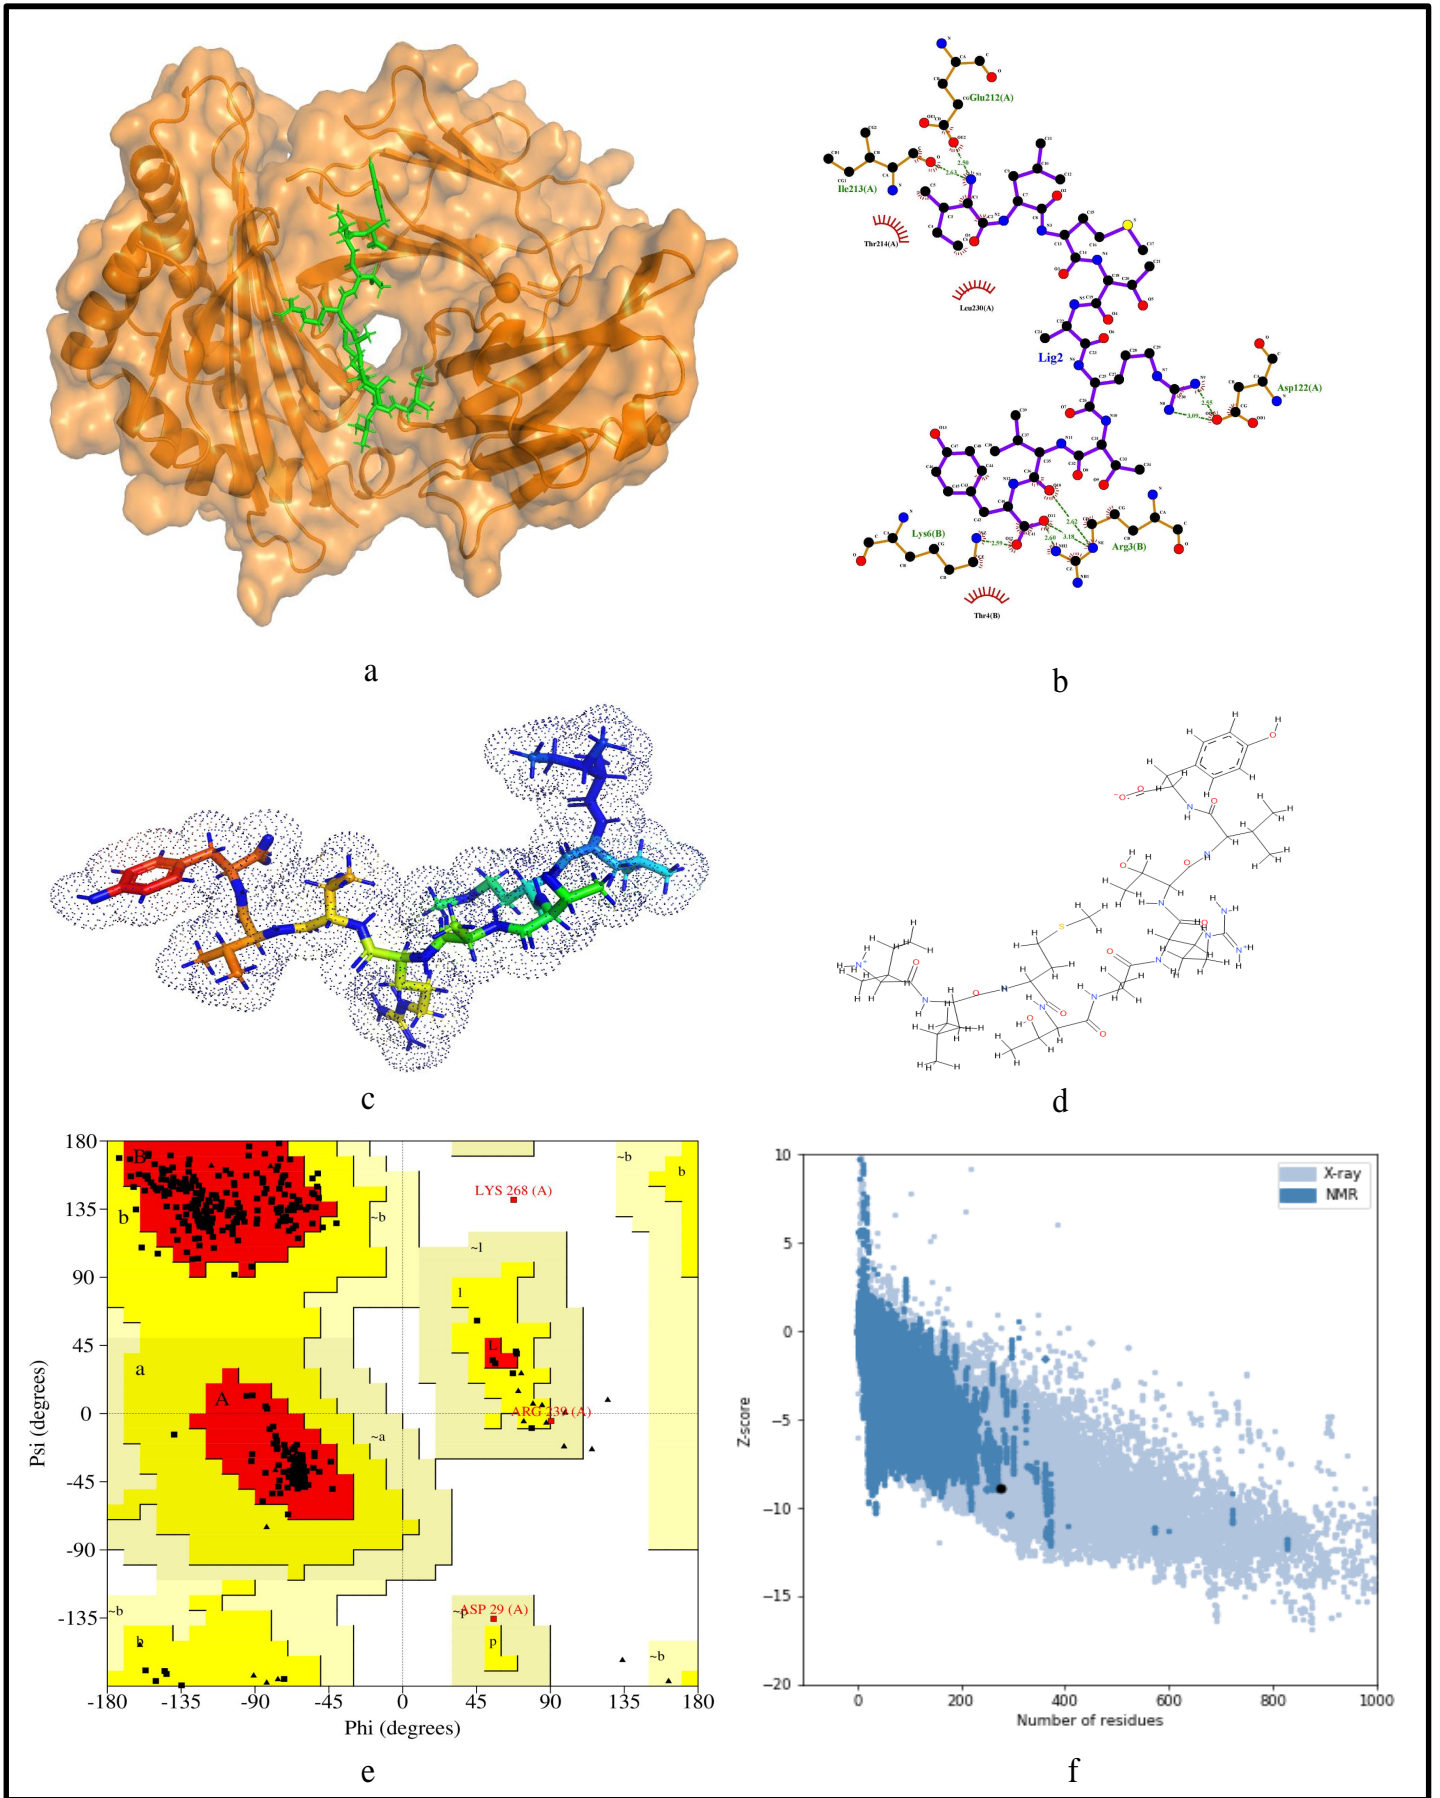

Figure S6: Structural analysis for MHC-I restricted T-cell epitope "ILMTARTVY" (a) Docking structure of MHC-I restricted T-cell epitope (b) 2D pose representation between the epitope and HLA allele showing the different non-covalent bonds (c) 3D structure of the epitope (d) Chemical structure of the epitope (e) Ramachandran plot of the epitope allele structure showing lower energy sites of the residues in different frames and (f) Z-Score plot



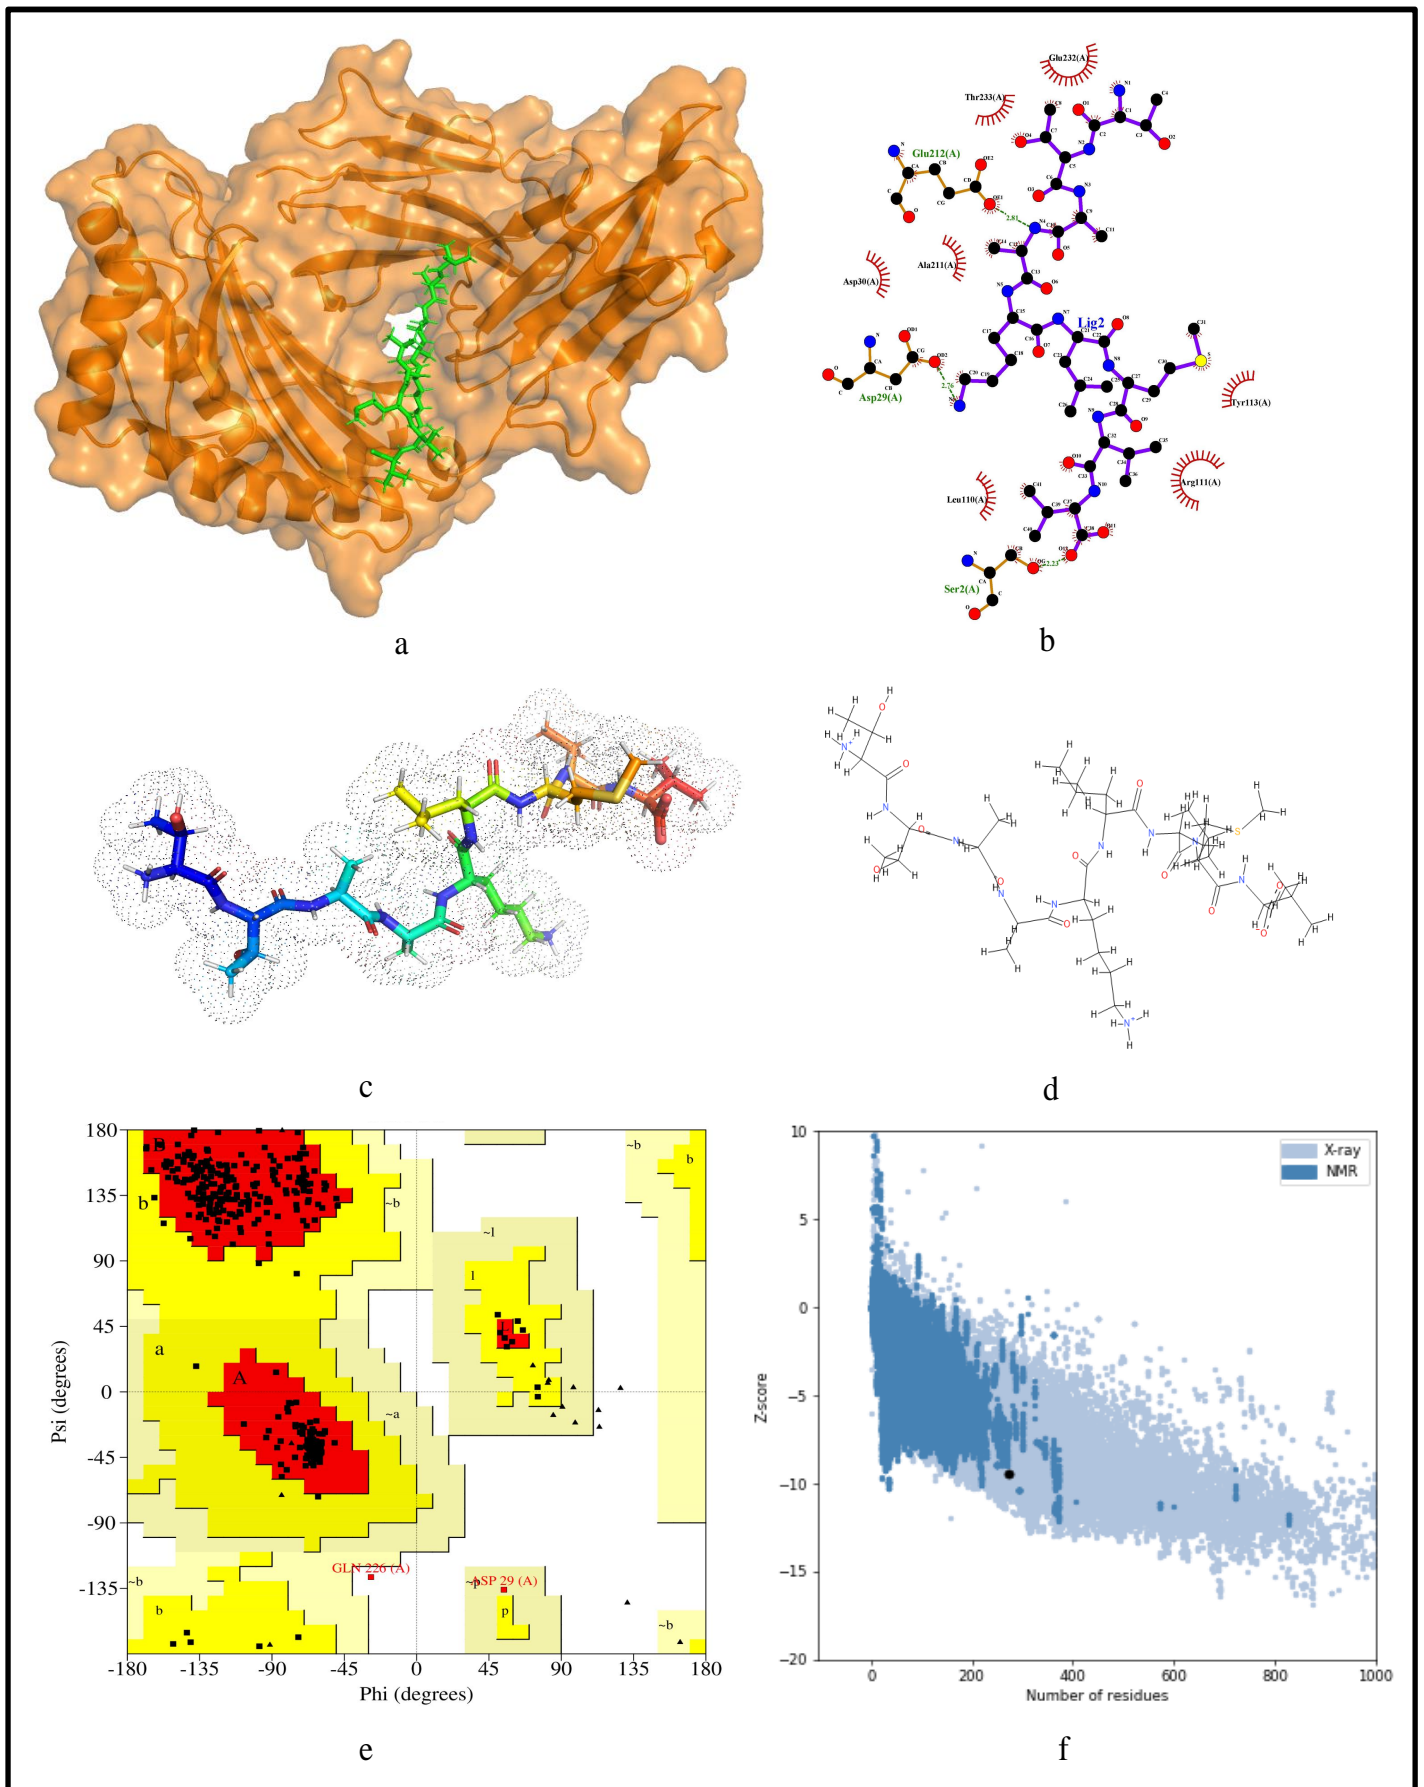

Figure S7: Structural analysis for MHC-I restricted T-cell epitope "TTAAKLMVV" (a) Docking structure of MHC-I restricted T-cell epitope (b) 2D pose representation between the epitope and HLA allele showing the different non-covalent bonds (c) 3D structure of the epitope (d) Chemical structure of the epitope (e) Ramachandran plot of the epitope allele structure showing lower energy sites of the residues in different frames and (f) Z-Score plot

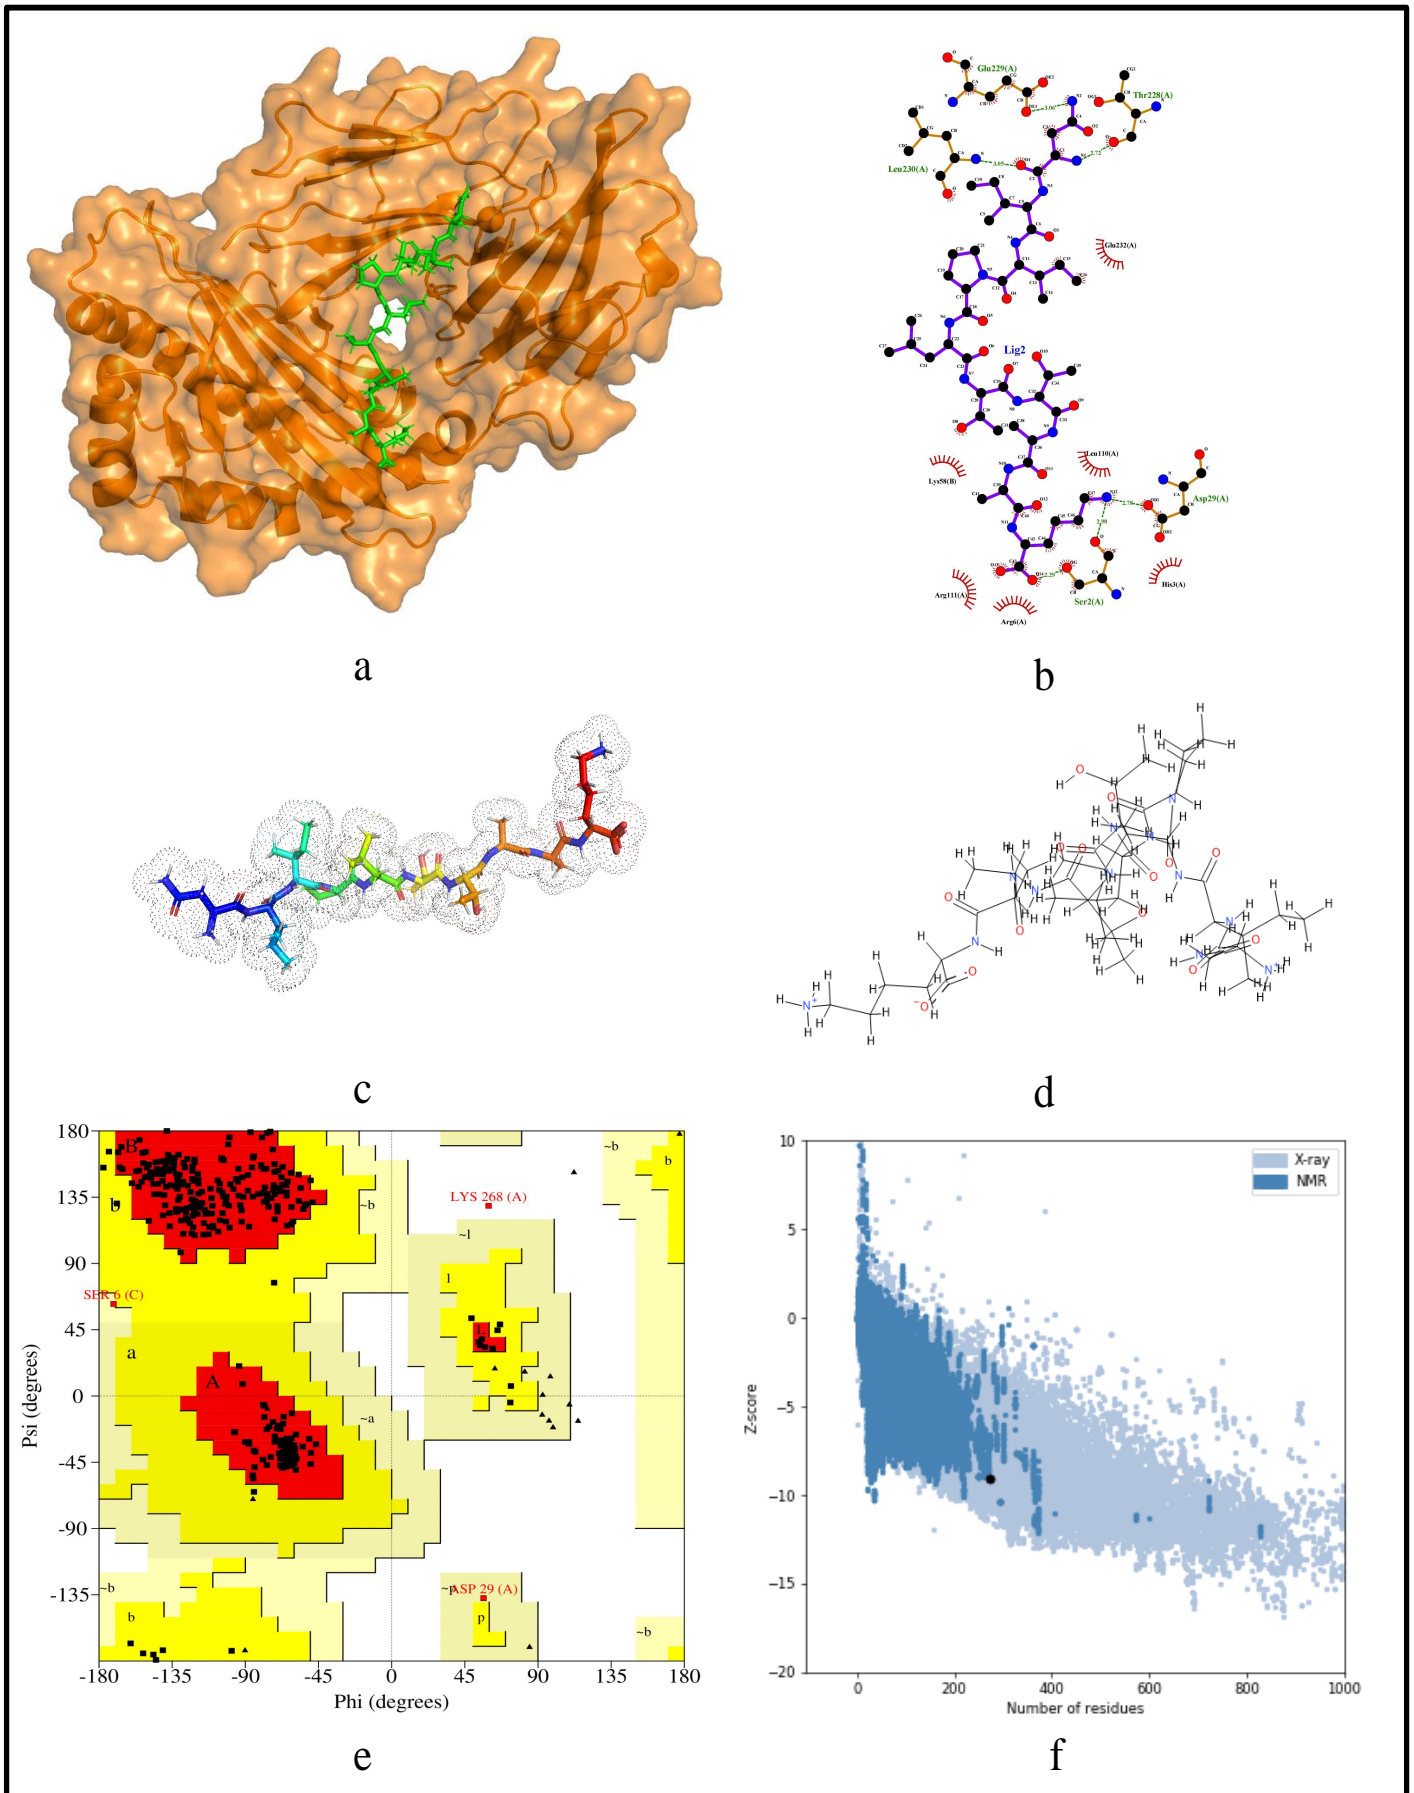

Figure S8: Structural analysis for MHC-I restricted T-cell epitope "NIIPLTAAK" (a) Docking structure of MHC-I restricted T-cell epitope (b) 2D pose representation between the epitope and HLA allele showing the different non-covalent bonds (c) 3D structure of the epitope (d) Chemical structure of the epitope (e) Ramachandran plot of the epitope allele structure showing lower energy sites of the residues in different frames and (f) Z-Score plot

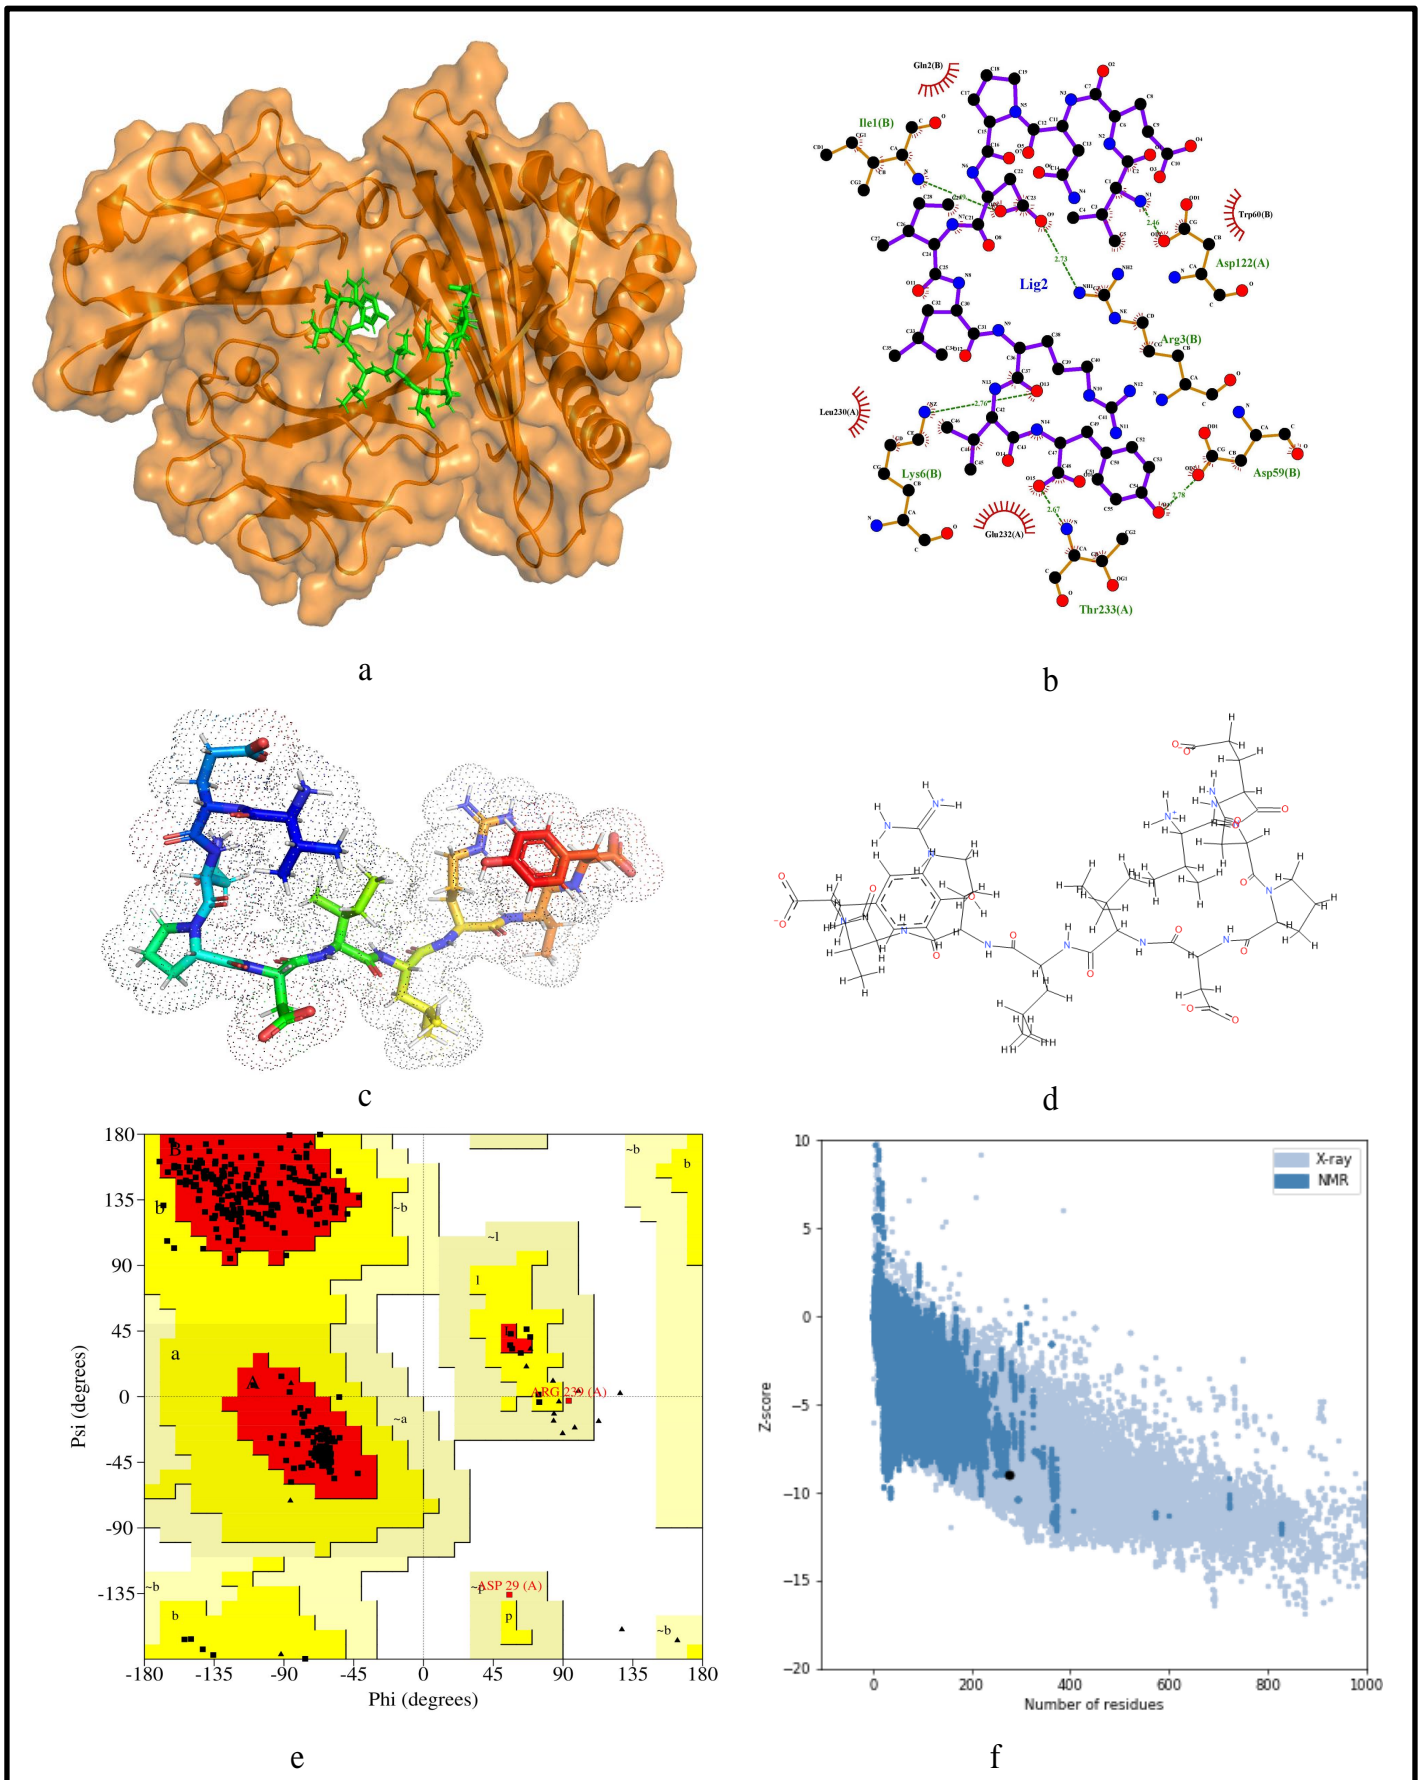

Figure S9: Structural analysis for MHC-I restricted T-cell epitope "VENPDILRVY" (a) Docking structure of MHC-I restricted T-cell epitope (b) 2D pose representation between the epitope and HLA allele showing the different non-covalent bonds (c) 3D structure of the epitope (d) Chemical structure of the epitope (e) Ramachandran plot of the epitope allele structure showing lower energy sites of the residues in different frames and (f) Z-Score plot

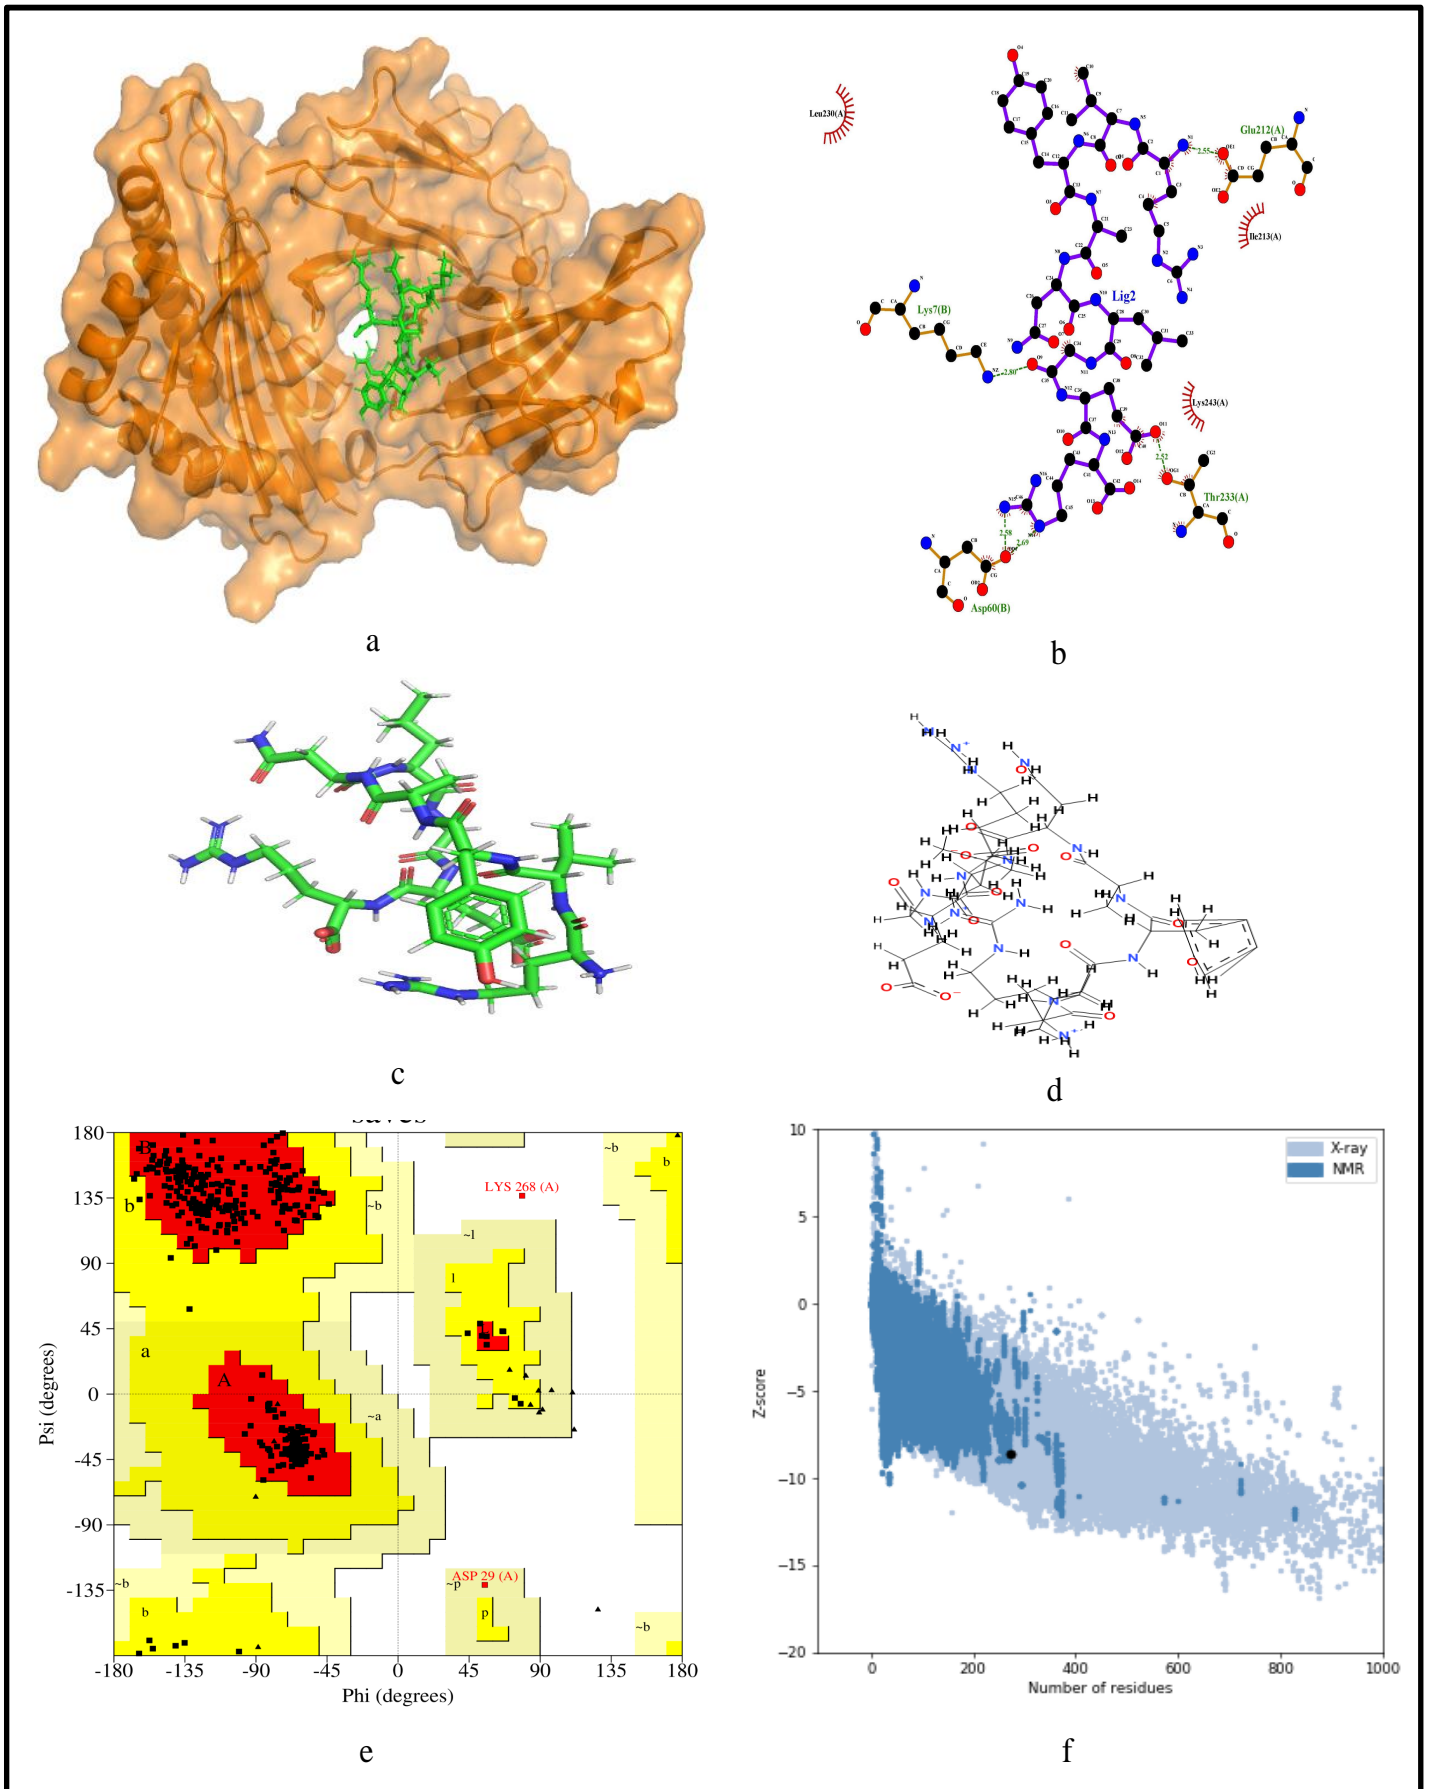

Figure S10: Structural analysis for MHC-I restricted T-cell epitope "RVYANLGER" (a) Docking structure of MHC-I restricted T-cell epitope (b) 2D pose representation between the epitope and HLA allele showing the different non-covalent bonds (c) 3D structure of the epitope (d) Chemical structure of the epitope (e) Ramachandran plot of the epitope allele structure showing lower energy sites of the residues in different frames and (f) Z-Score plot

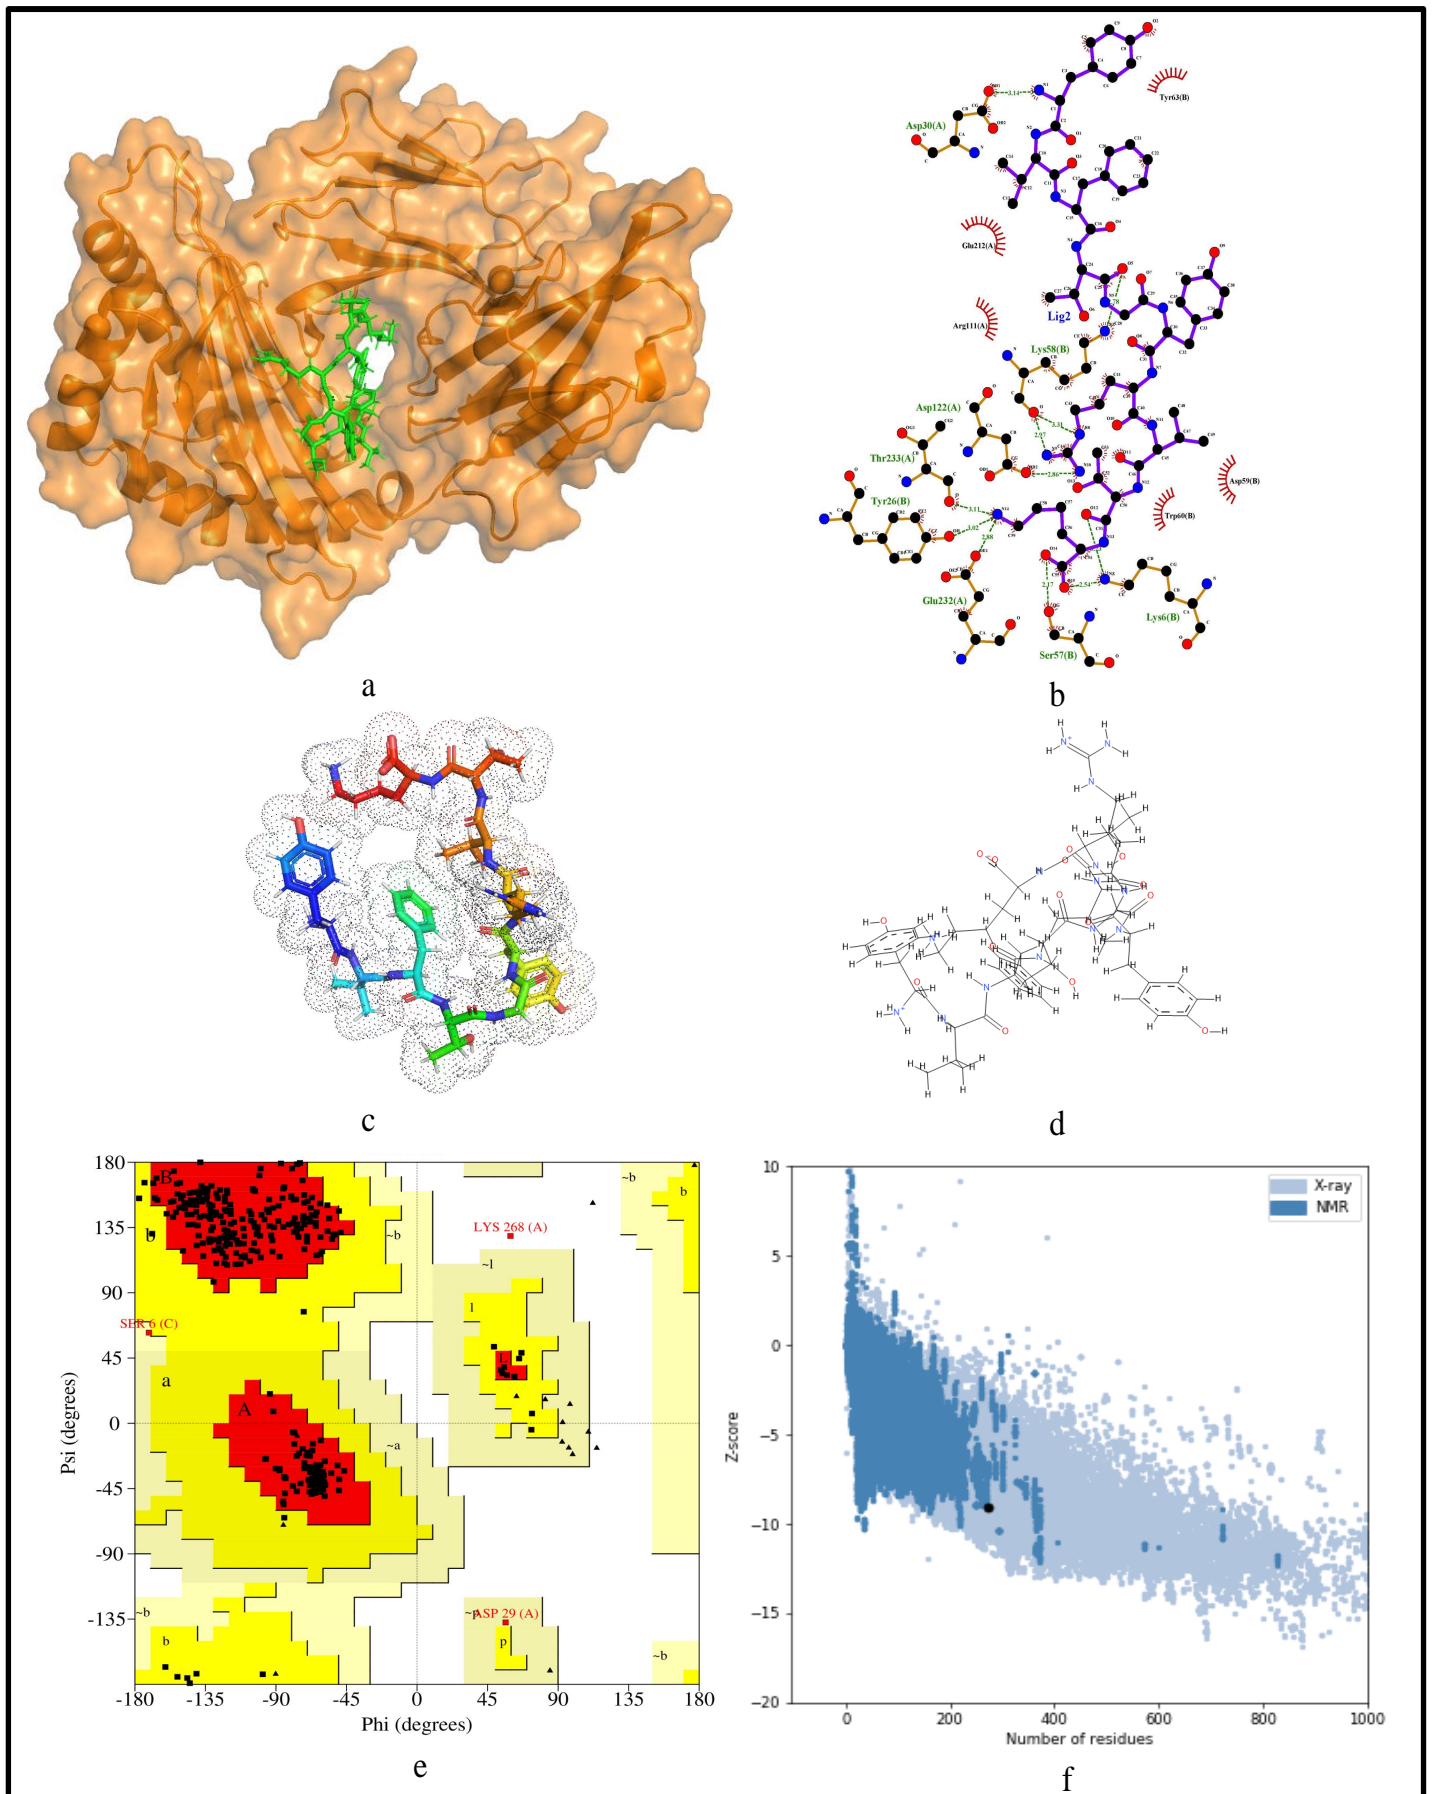

Figure S11: Structural analysis for MHC-I restricted T-cell epitope "YVFTGYRVTK" (a) Docking structure of MHC-I restricted T-cell epitope (b) 2D pose representation between the epitope and HLA allele showing the different non-covalent bonds (c) 3D structure of the epitope (d) Chemical structure of the epitope (e) Ramachandran plot of the epitope allele structure showing lower energy sites of the residues in different frames and (f) Z-Score plot

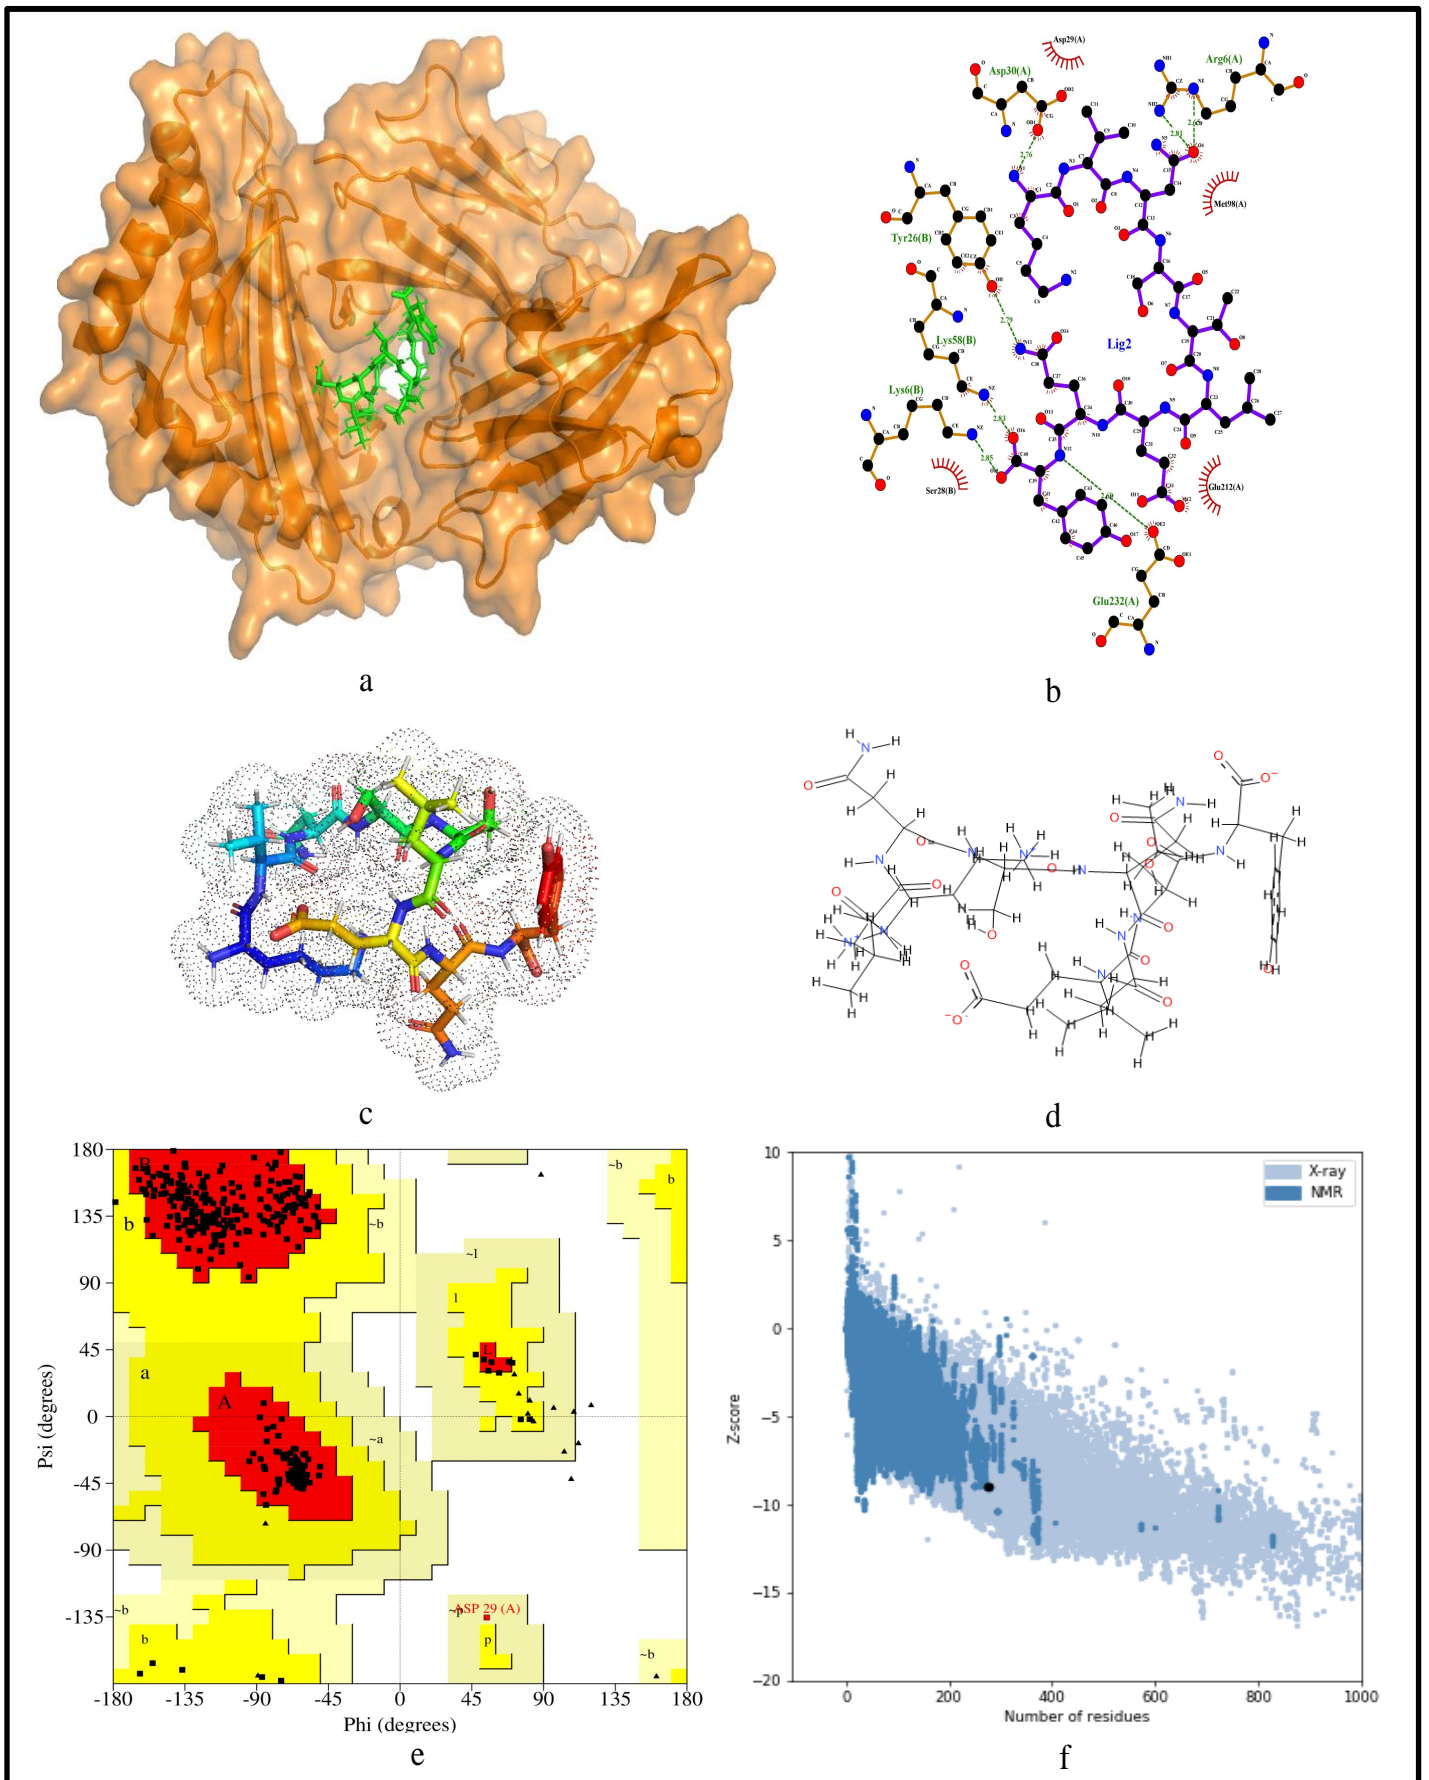

Figure S12: Structural analysis for MHC-I restricted T-cell epitope "KVNSTLEQY" (a) Docking structure of MHC-I restricted T-cell epitope (b) 2D pose representation between the epitope and HLA allele showing the different non-covalent bonds (c) 3D structure of the epitope (d) Chemical structure of the epitope (e) Ramachandran plot of the epitope allele structure showing lower energy sites of the residues in different frames and (f) Z-Score plot

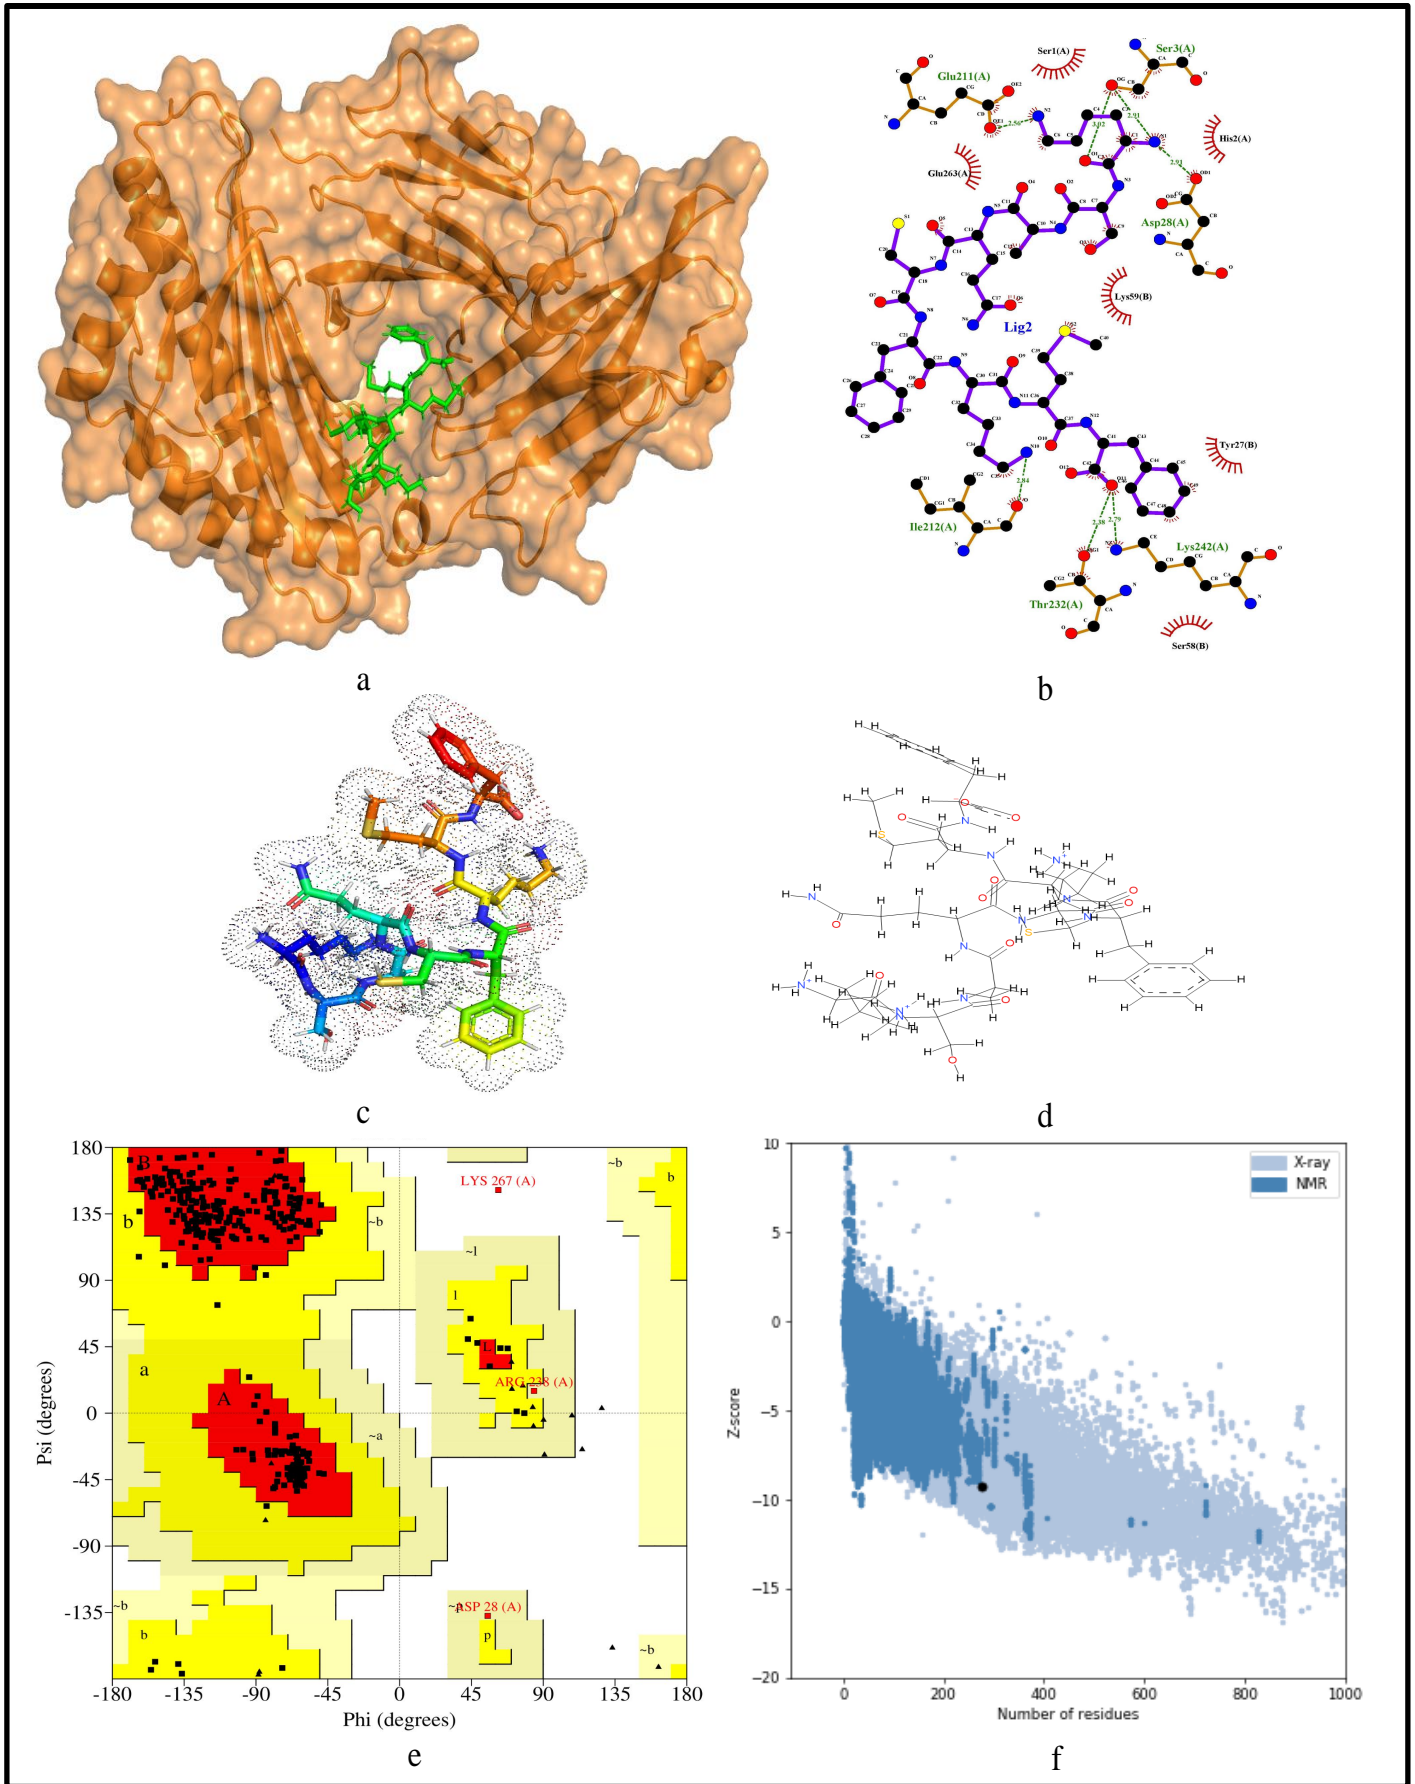

Figure S13: Structural analysis for MHC-I restricted T-cell epitope "KSAQCFKMF" (a) Docking structure of MHC-I restricted T-cell epitope (b) 2D pose representation between the epitope and HLA allele showing the different non-covalent bonds (c) 3D structure of the epitope (d) Chemical structure of the epitope (e) Ramachandran plot of the epitope allele structure showing lower energy sites of the residues in different frames and (f) Z-Score plot

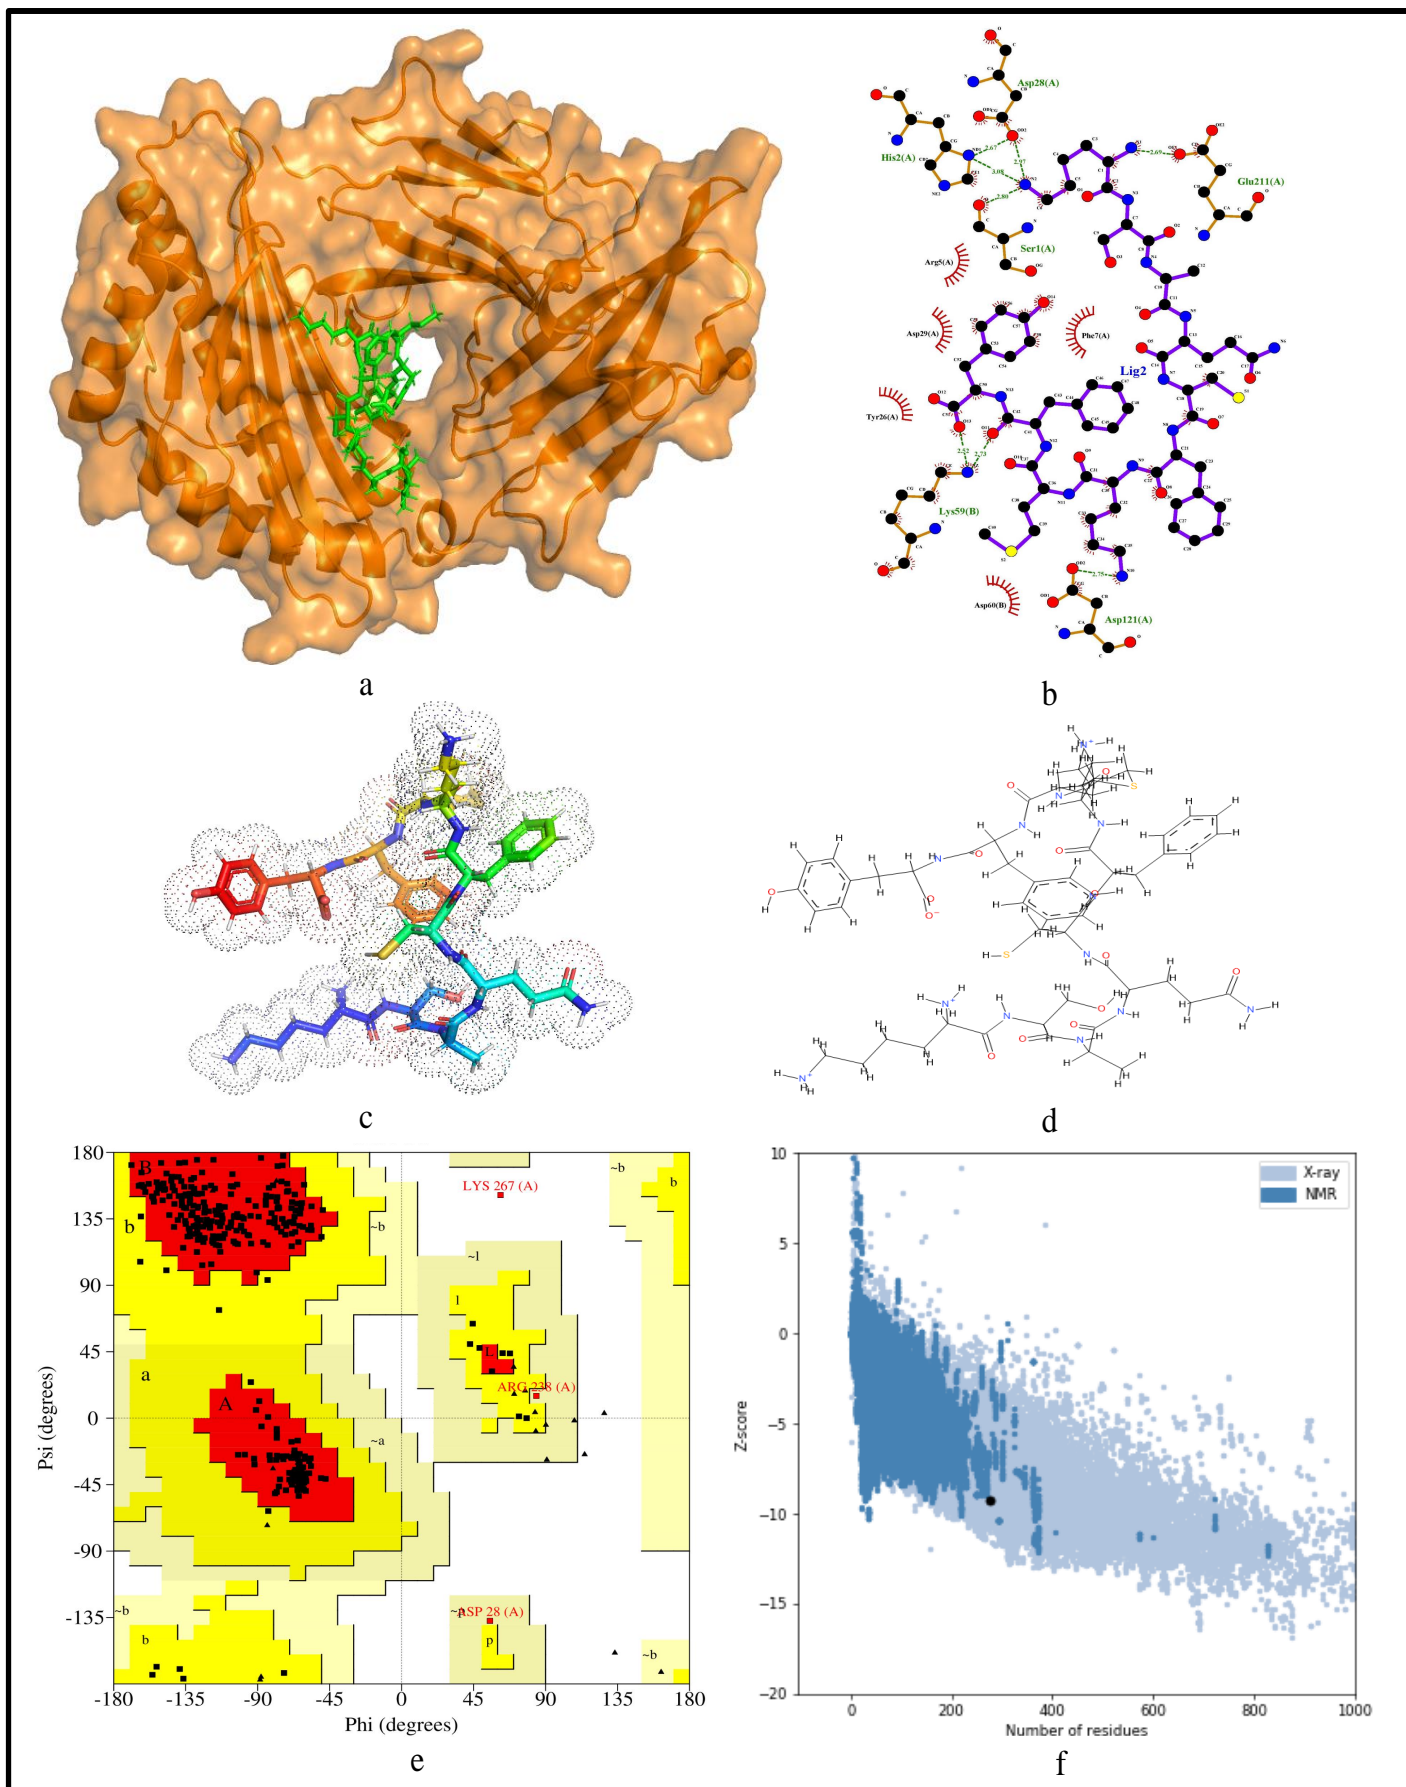

Figure S14: Structural analysis for MHC-I restricted T-cell epitope "KSAQCCKMFY" (a) Docking structure of MHC-I restricted T-cell epitope (b) 2D pose representation between the epitope and HLA allele showing the different non-covalent bonds (c) 3D structure of the epitope (d) Chemical structure of the epitope (e) Ramachandran plot of the epitope allele structure showing lower energy sites of the residues in different frames and (f) Z-Score plot



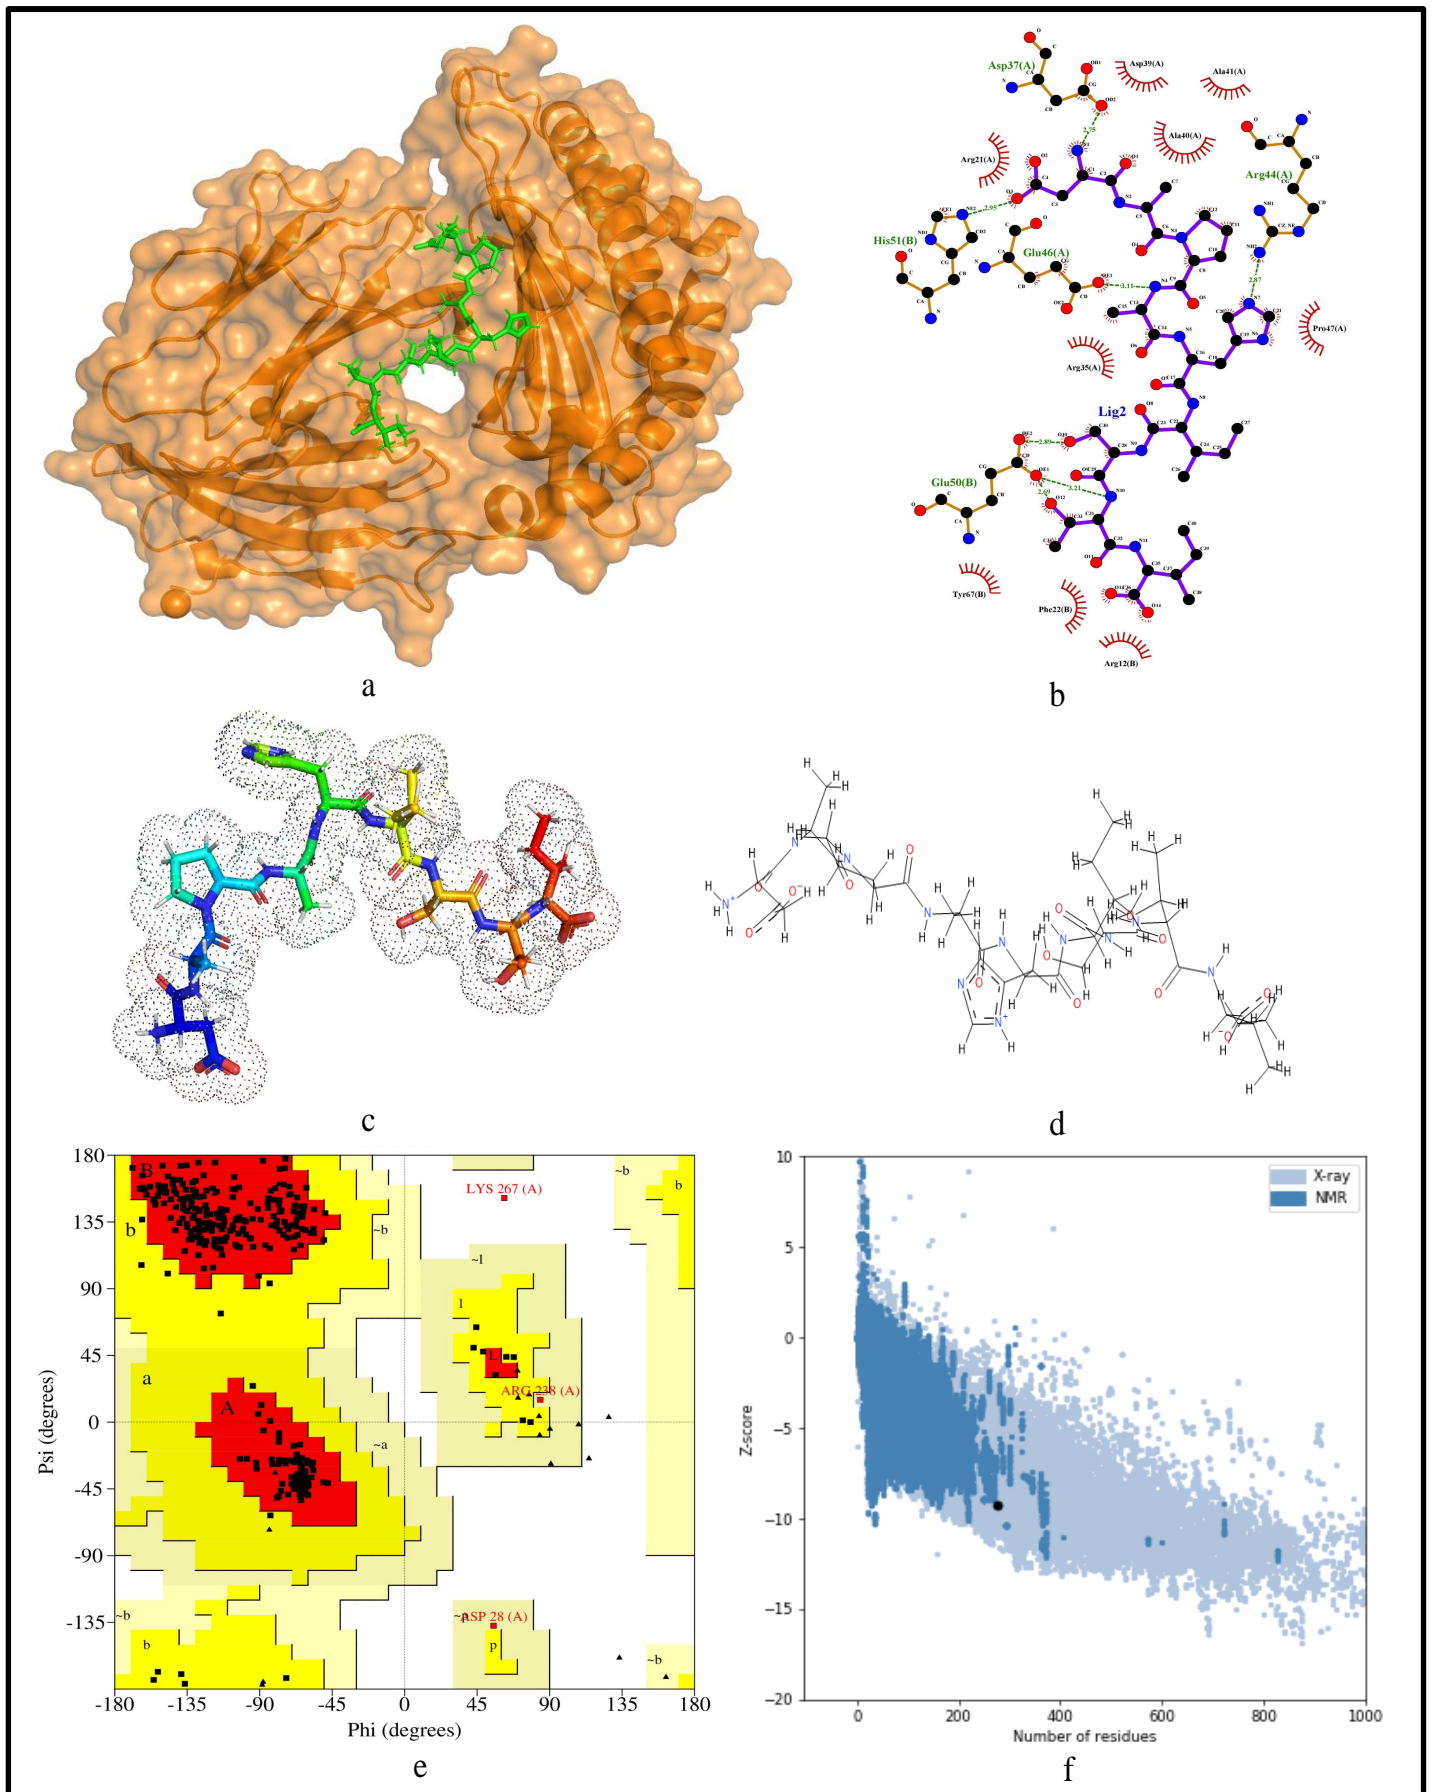

Figure S15: Structural analysis for MHC-I restricted T-cell epitope "DAPAHISTI" (a) Docking structure of MHC-I restricted T-cell epitope (b) 2D pose representation between the epitope and HLA allele showing the different non-covalent bonds (c) 3D structure of the epitope (d) Chemical structure of the epitope (e) Ramachandran plot of the epitope allele structure showing lower energy sites of the residues in different frames and (f) Z-Score plot

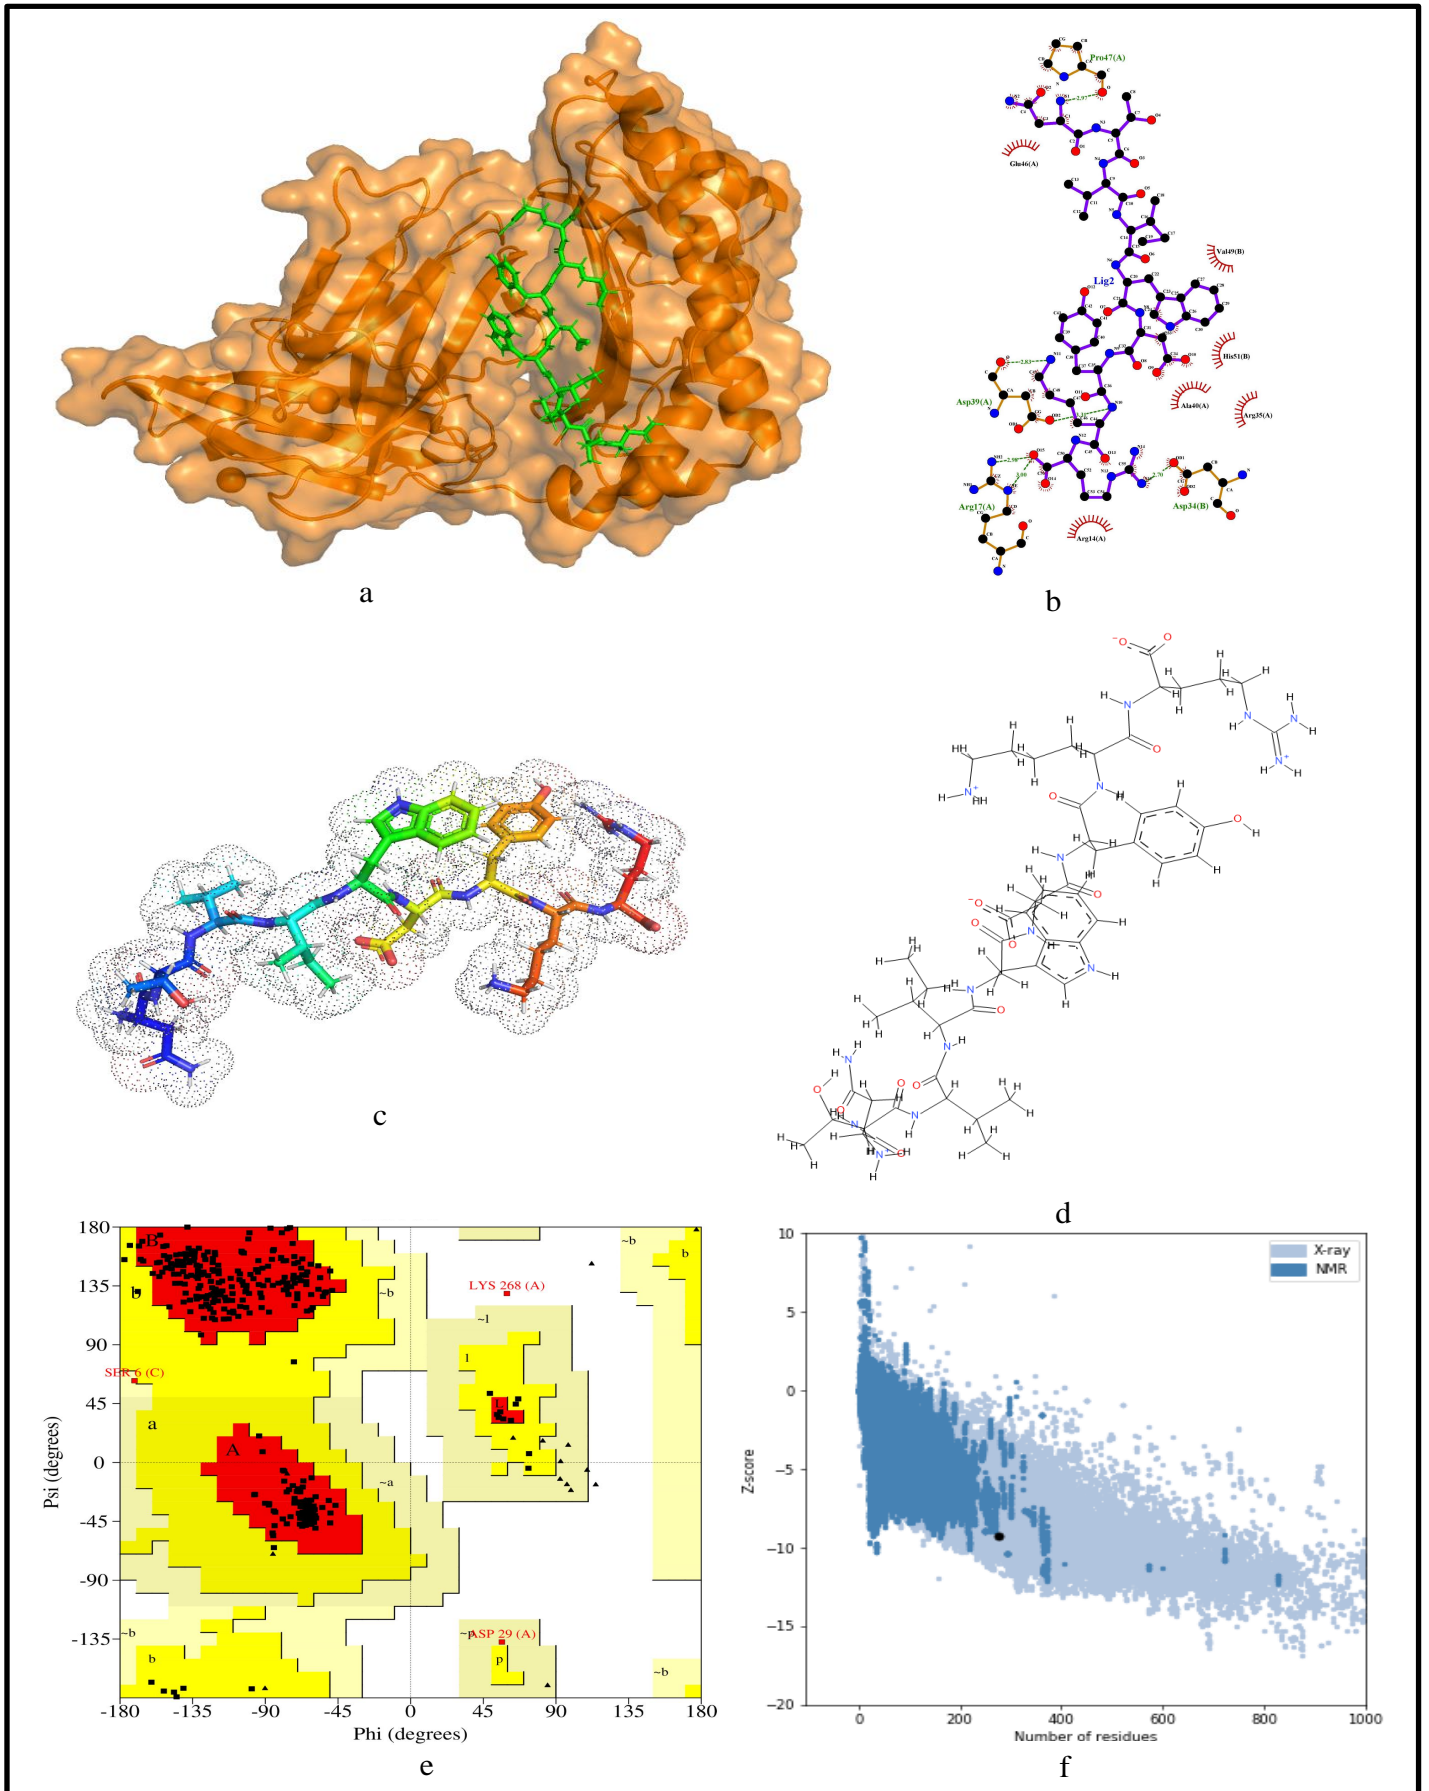

Figure S16: Structural analysis for MHC-I restricted T-cell epitope "NTVIWDYKR" (a) Docking structure of MHC-I restricted T-cell epitope (b) 2D pose representation between the epitope and HLA allele showing the different non-covalent bonds (c) 3D structure of the epitope (d) Chemical structure of the epitope (e) Ramachandran plot of the epitope allele structure showing lower energy sites of the residues in different frames and (f) Z-Score plot

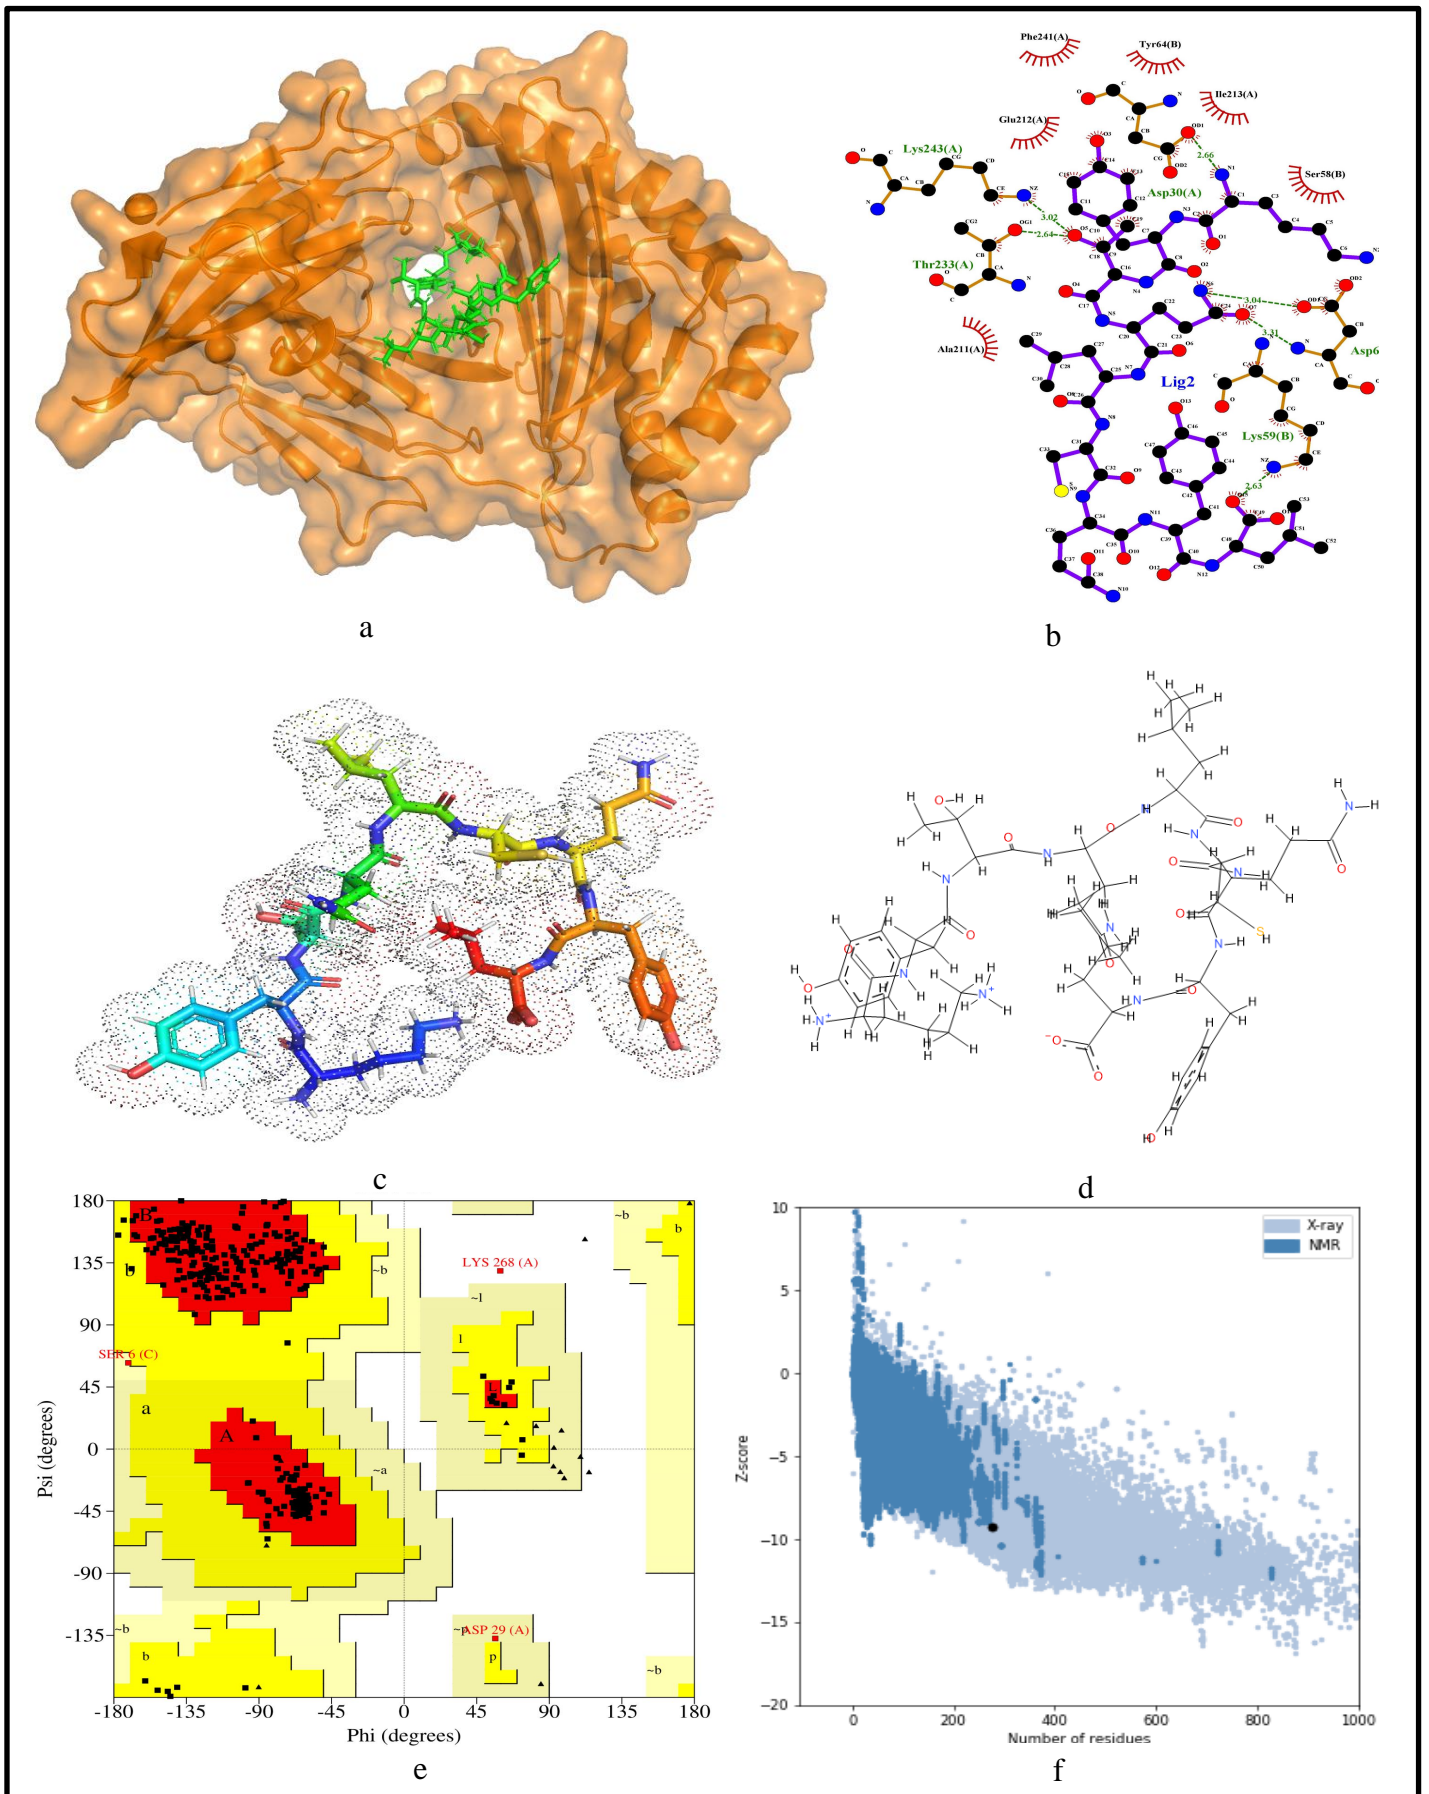

Figure S17: Structural analysis for MHC-I restricted T-cell epitope "KYTQLCQYL" (a) Docking structure of MHC-I restricted T-cell epitope (b) 2D pose representation between the epitope and HLA allele showing the different non-covalent bonds (c) 3D structure of the epitope (d) Chemical structure of the epitope (e) Ramachandran plot of the epitope allele structure showing lower energy sites of the residues in different frames and (f) Z-Score plot

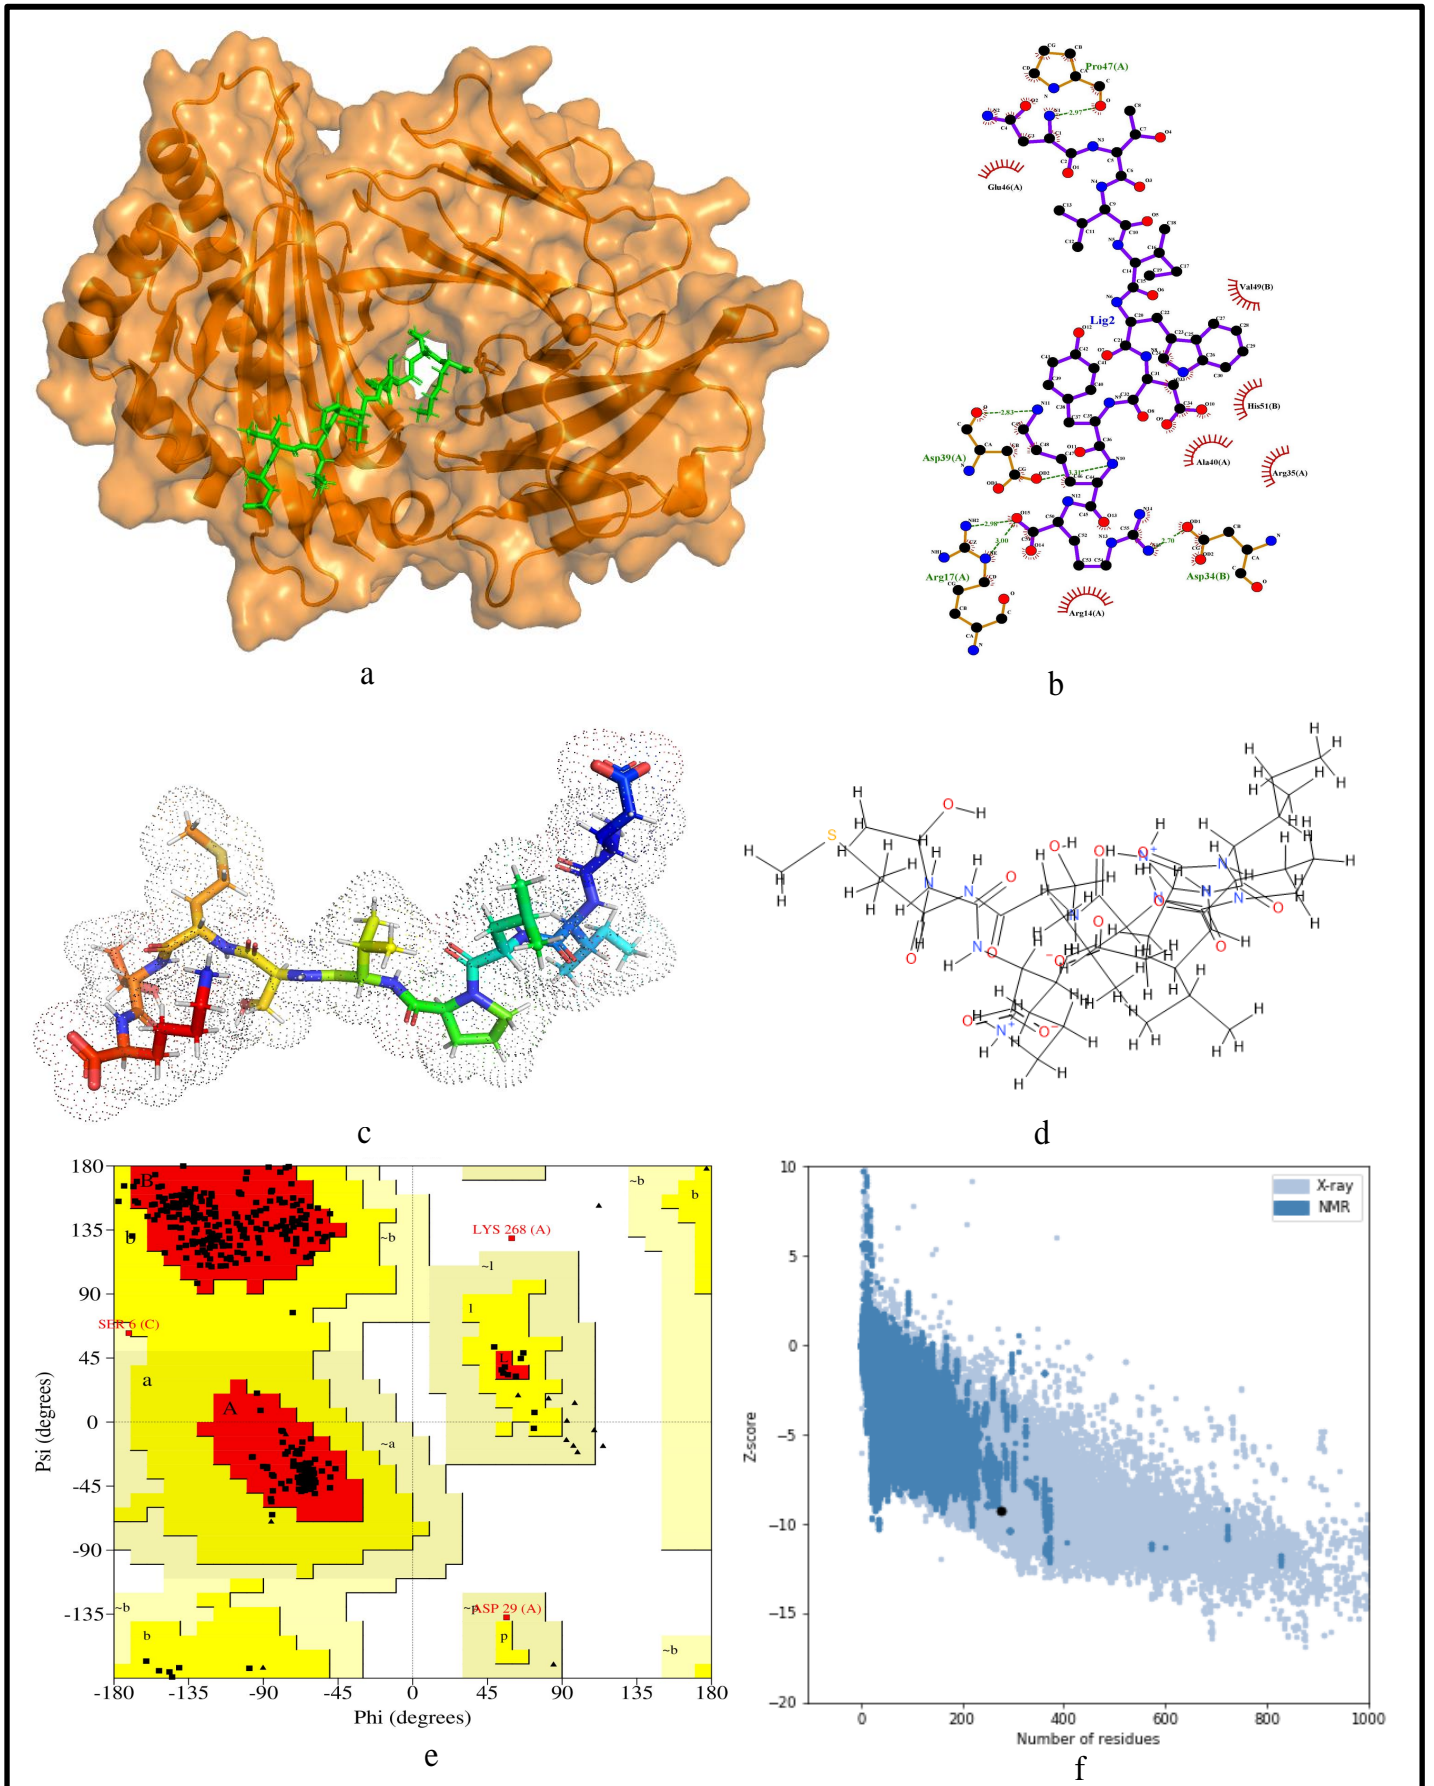

Figure S18: Structural analysis for MHC-I restricted T-cell epitope "EILPVSMTK" (a) Docking structure of MHC-I restricted T-cell epitope (b) 2D pose representation between the epitope and HLA allele showing the different non-covalent bonds (c) 3D structure of the epitope (d) Chemical structure of the epitope (e) Ramachandran plot of the epitope allele structure showing lower energy sites of the residues in different frames and (f) Z-Score plot

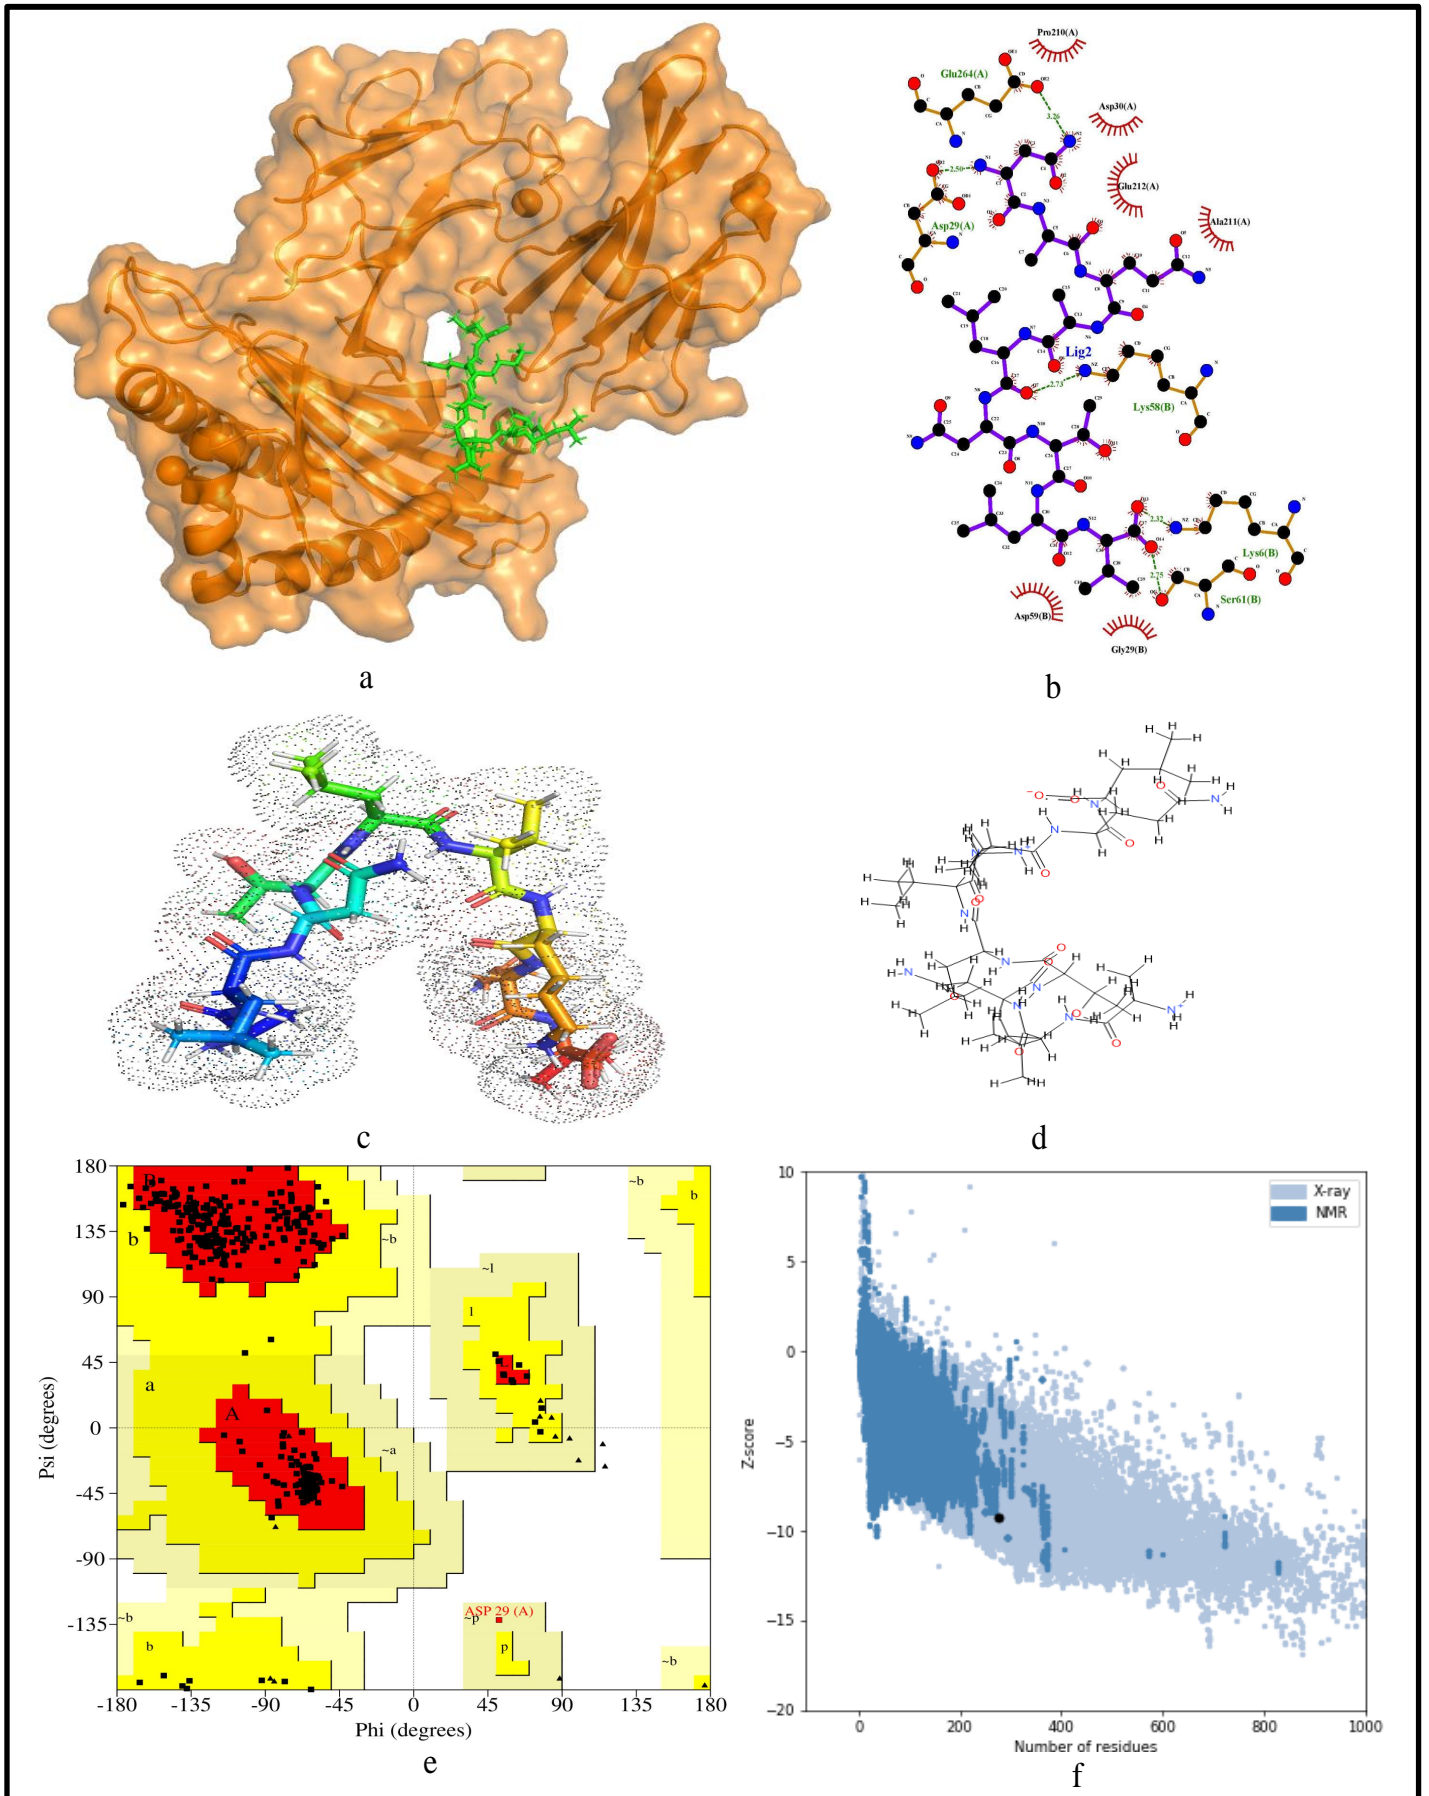

Figure S19: Structural analysis for MHC-I restricted T-cell epitope "ALNTLVKQL" (a) Docking structure of MHC-I restricted T-cell epitope (b) 2D pose representation between the epitope and HLA allele showing the different non-covalent bonds (c) 3D structure of the epitope (d) Chemical structure of the epitope (e) Ramachandran plot of the epitope allele structure showing lower energy sites of the residues in different frames and (f) Z-Score plot

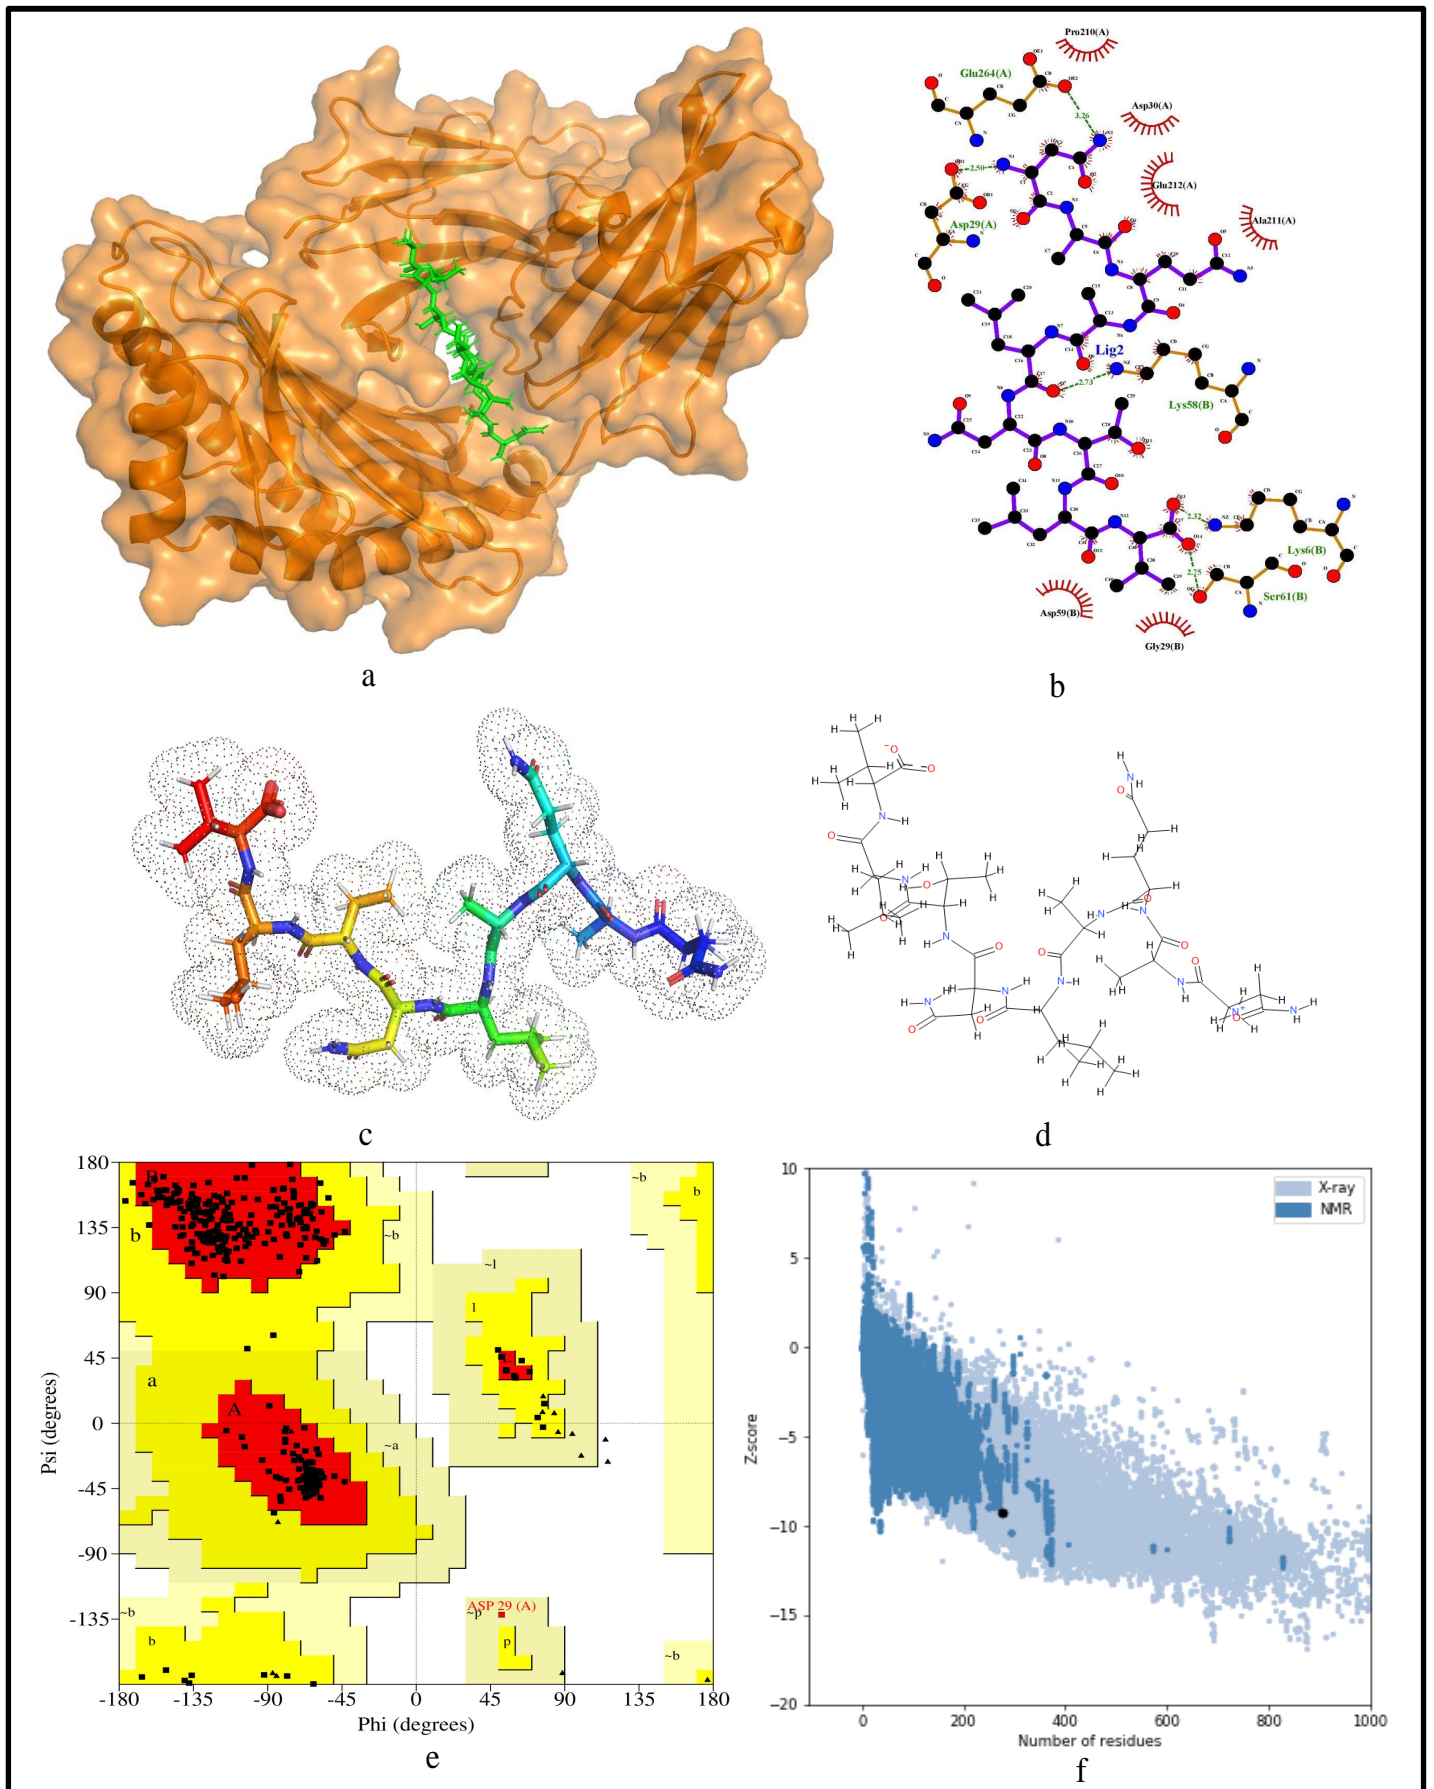

Figure S20: Structural analysis for MHC-I restricted T-cell epitope "NAQALNTLV" (a) Docking structure of MHC-I restricted T-cell epitope (b) 2D pose representation between the epitope and HLA allele showing the different non-covalent bonds (c) 3D structure of the epitope (d) Chemical structure of the epitope (e) Ramachandran plot of the epitope allele structure showing lower energy sites of the residues in different frames and (f) Z-Score plot

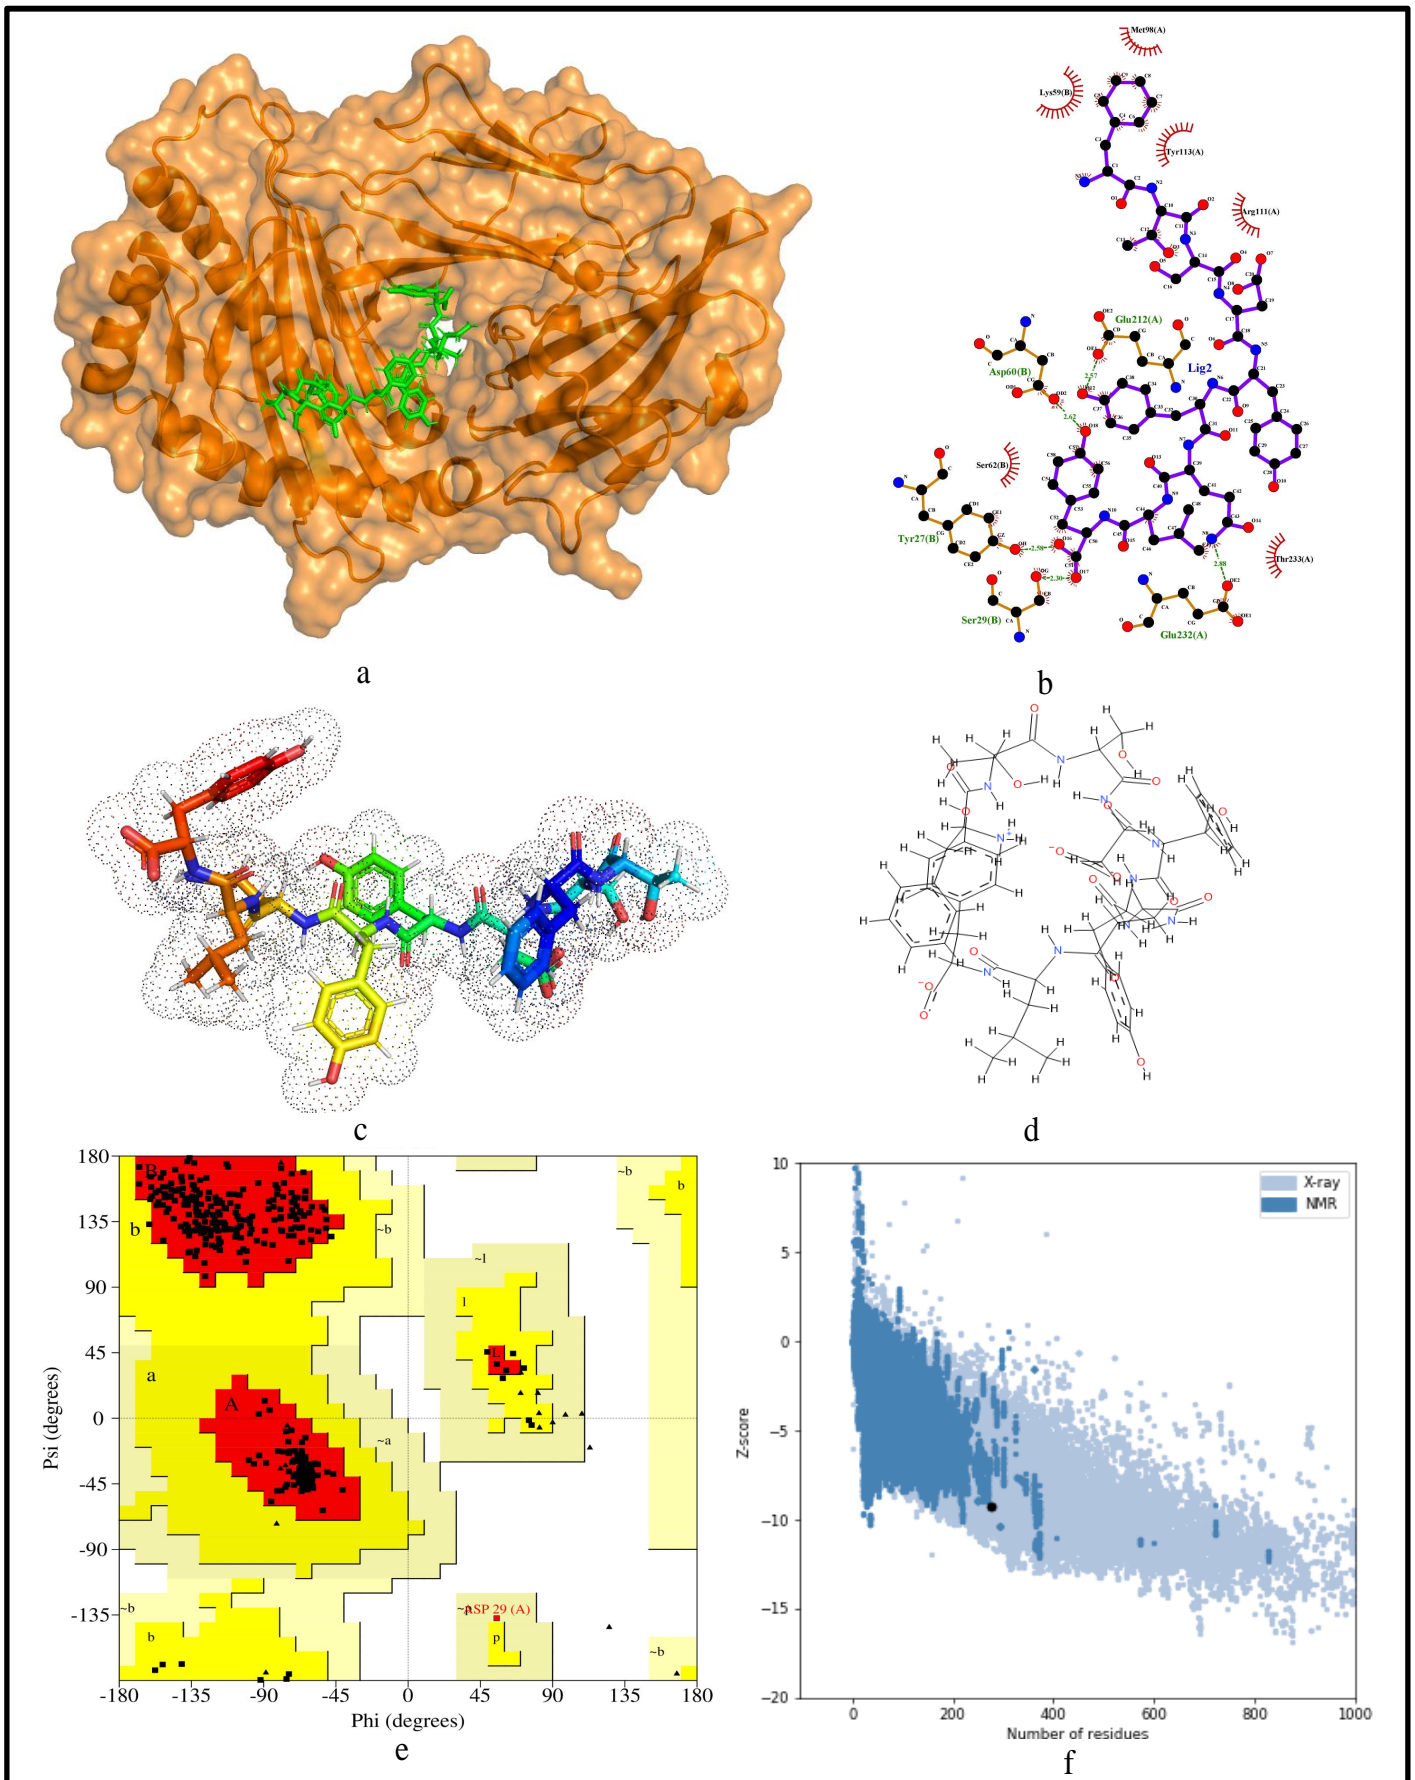

Figure S21: Structural analysis for MHC-I restricted T-cell epitope "FTSDYYQLY" (a) Docking structure of MHC-I restricted T-cell epitope (b) 2D pose representation between the epitope and HLA allele showing the different non-covalent bonds (c) 3D structure of the epitope (d) Chemical structure of the epitope (e) Ramachandran plot of the epitope allele structure showing lower energy sites of the residues in different frames and (f) Z-Score plot

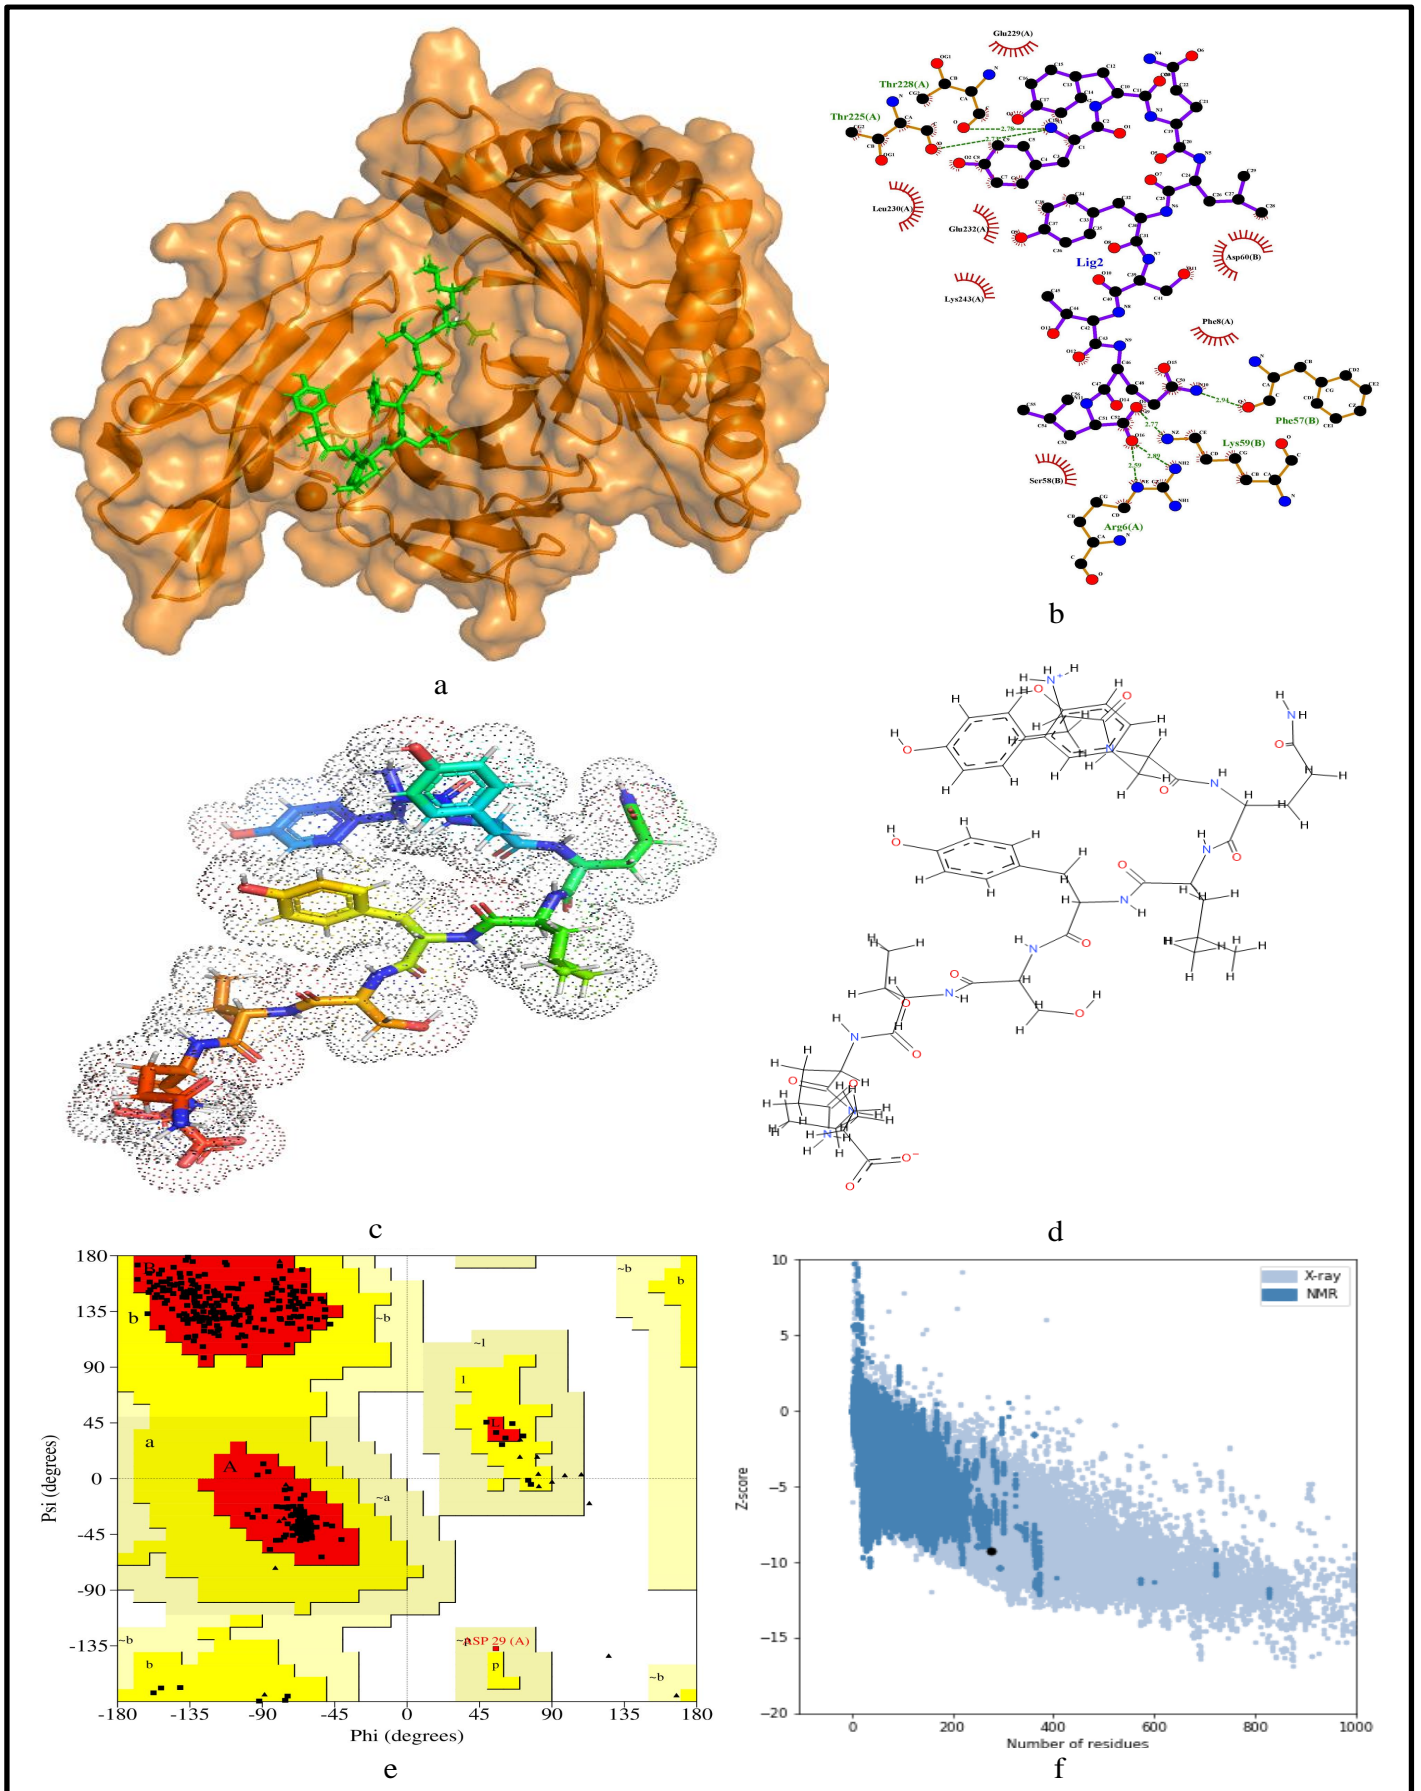

Figure S22: Structural analysis for MHC-I restricted T-cell epitope "YYQLYSTQL" (a) Docking structure of MHC-I restricted T-cell epitope (b) 2D pose representation between the epitope and HLA allele showing the different non-covalent bonds (c) 3D structure of the epitope (d) Chemical structure of the epitope (e) Ramachandran plot of the epitope allele structure showing lower energy sites of the residues in different frames and (f) Z-Score plot



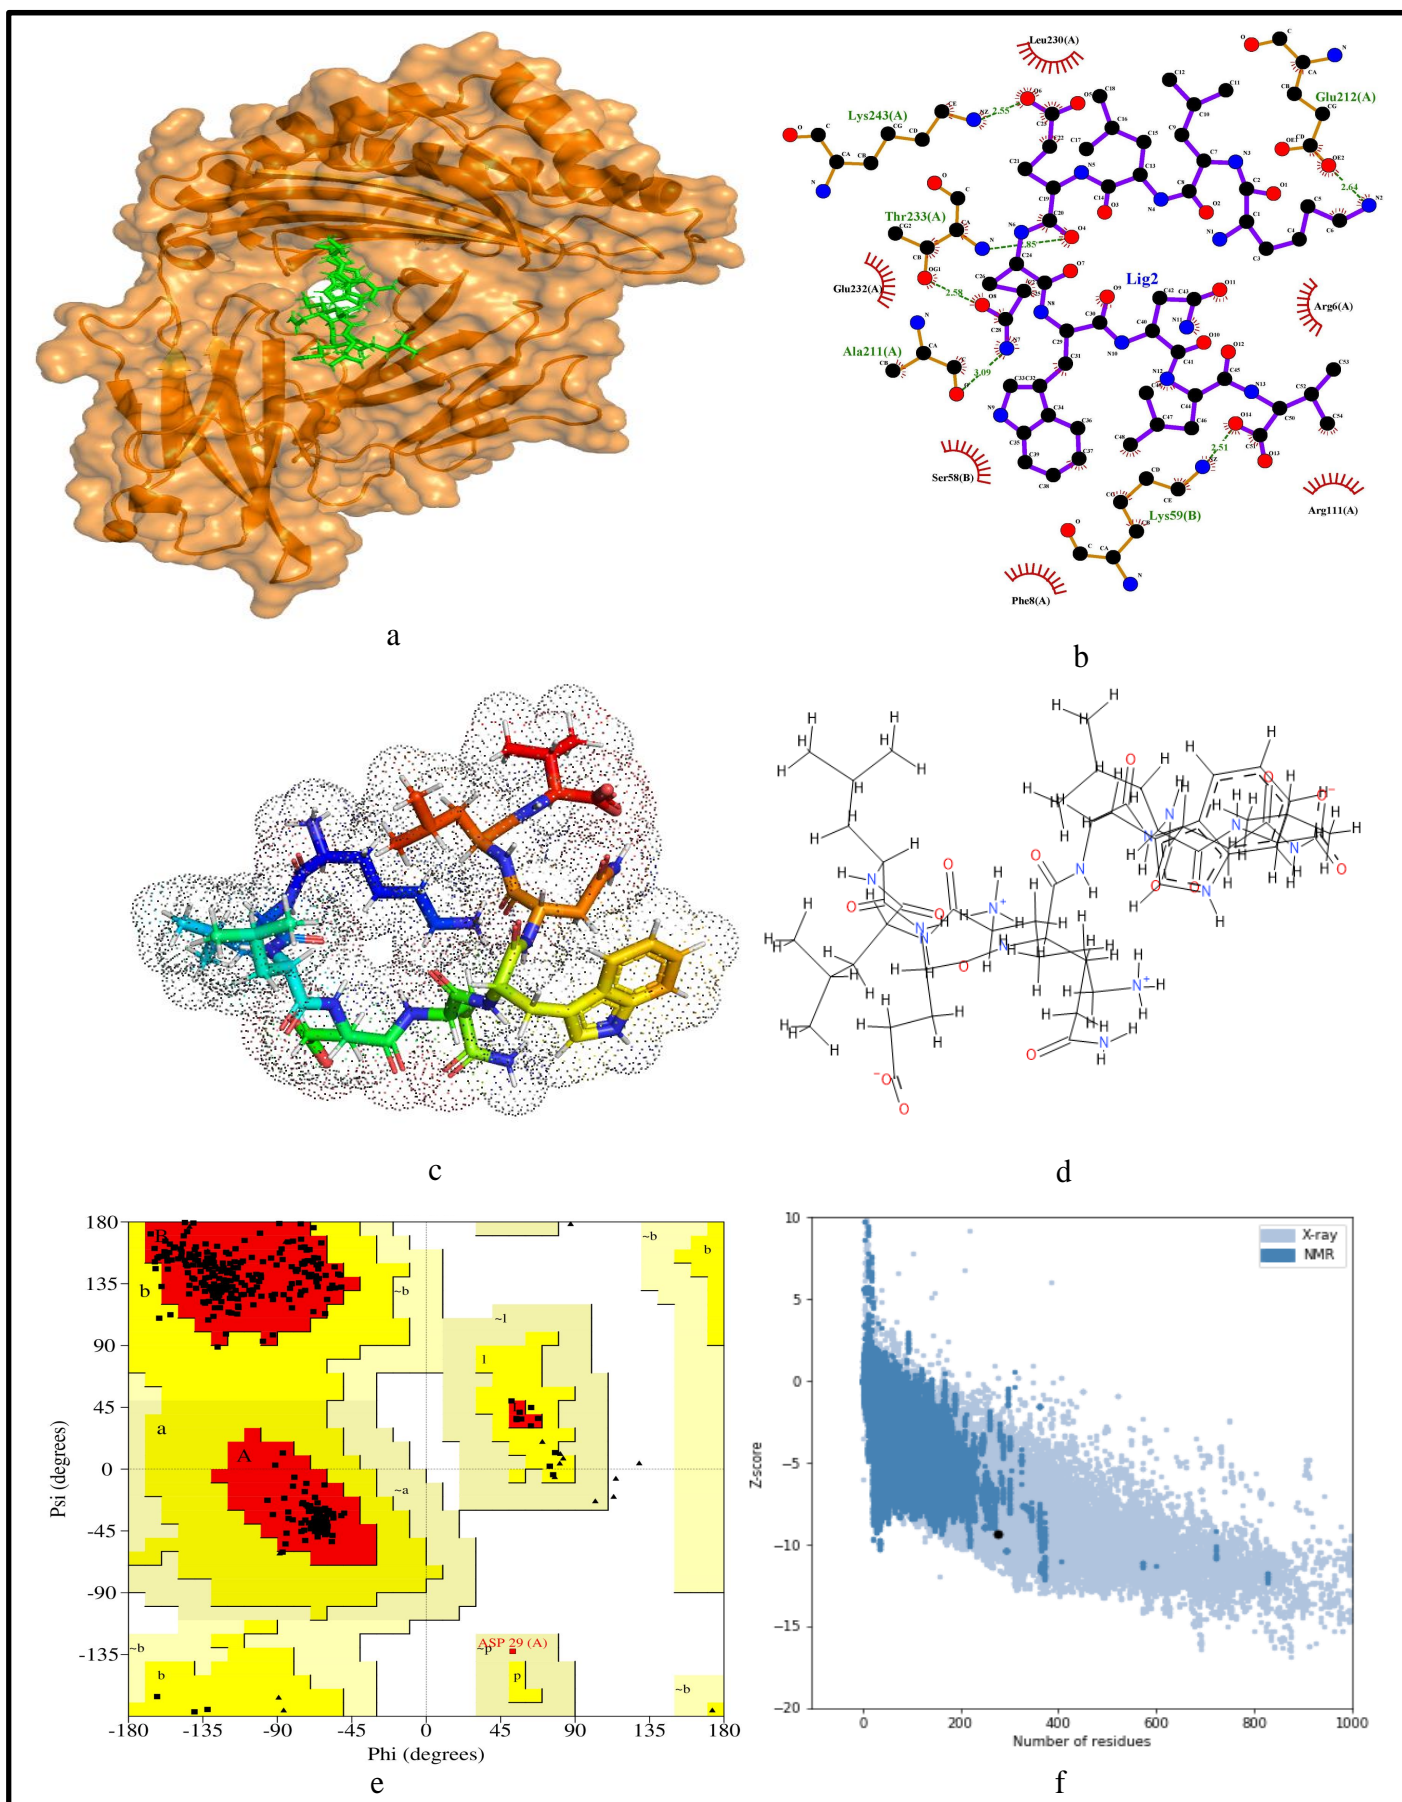

Figure S23: Structural analysis for MHC-I restricted T-cell epitope "KLLEQWNLV" (a) Docking structure of MHC-I restricted T-cell epitope (b) 2D pose representation between the epitope and HLA allele showing the different non-covalent bonds (c) 3D structure of the epitope (d) Chemical structure of the epitope (e) Ramachandran plot of the epitope allele structure showing lower energy sites of the residues in different frames and (f) Z-Score plot

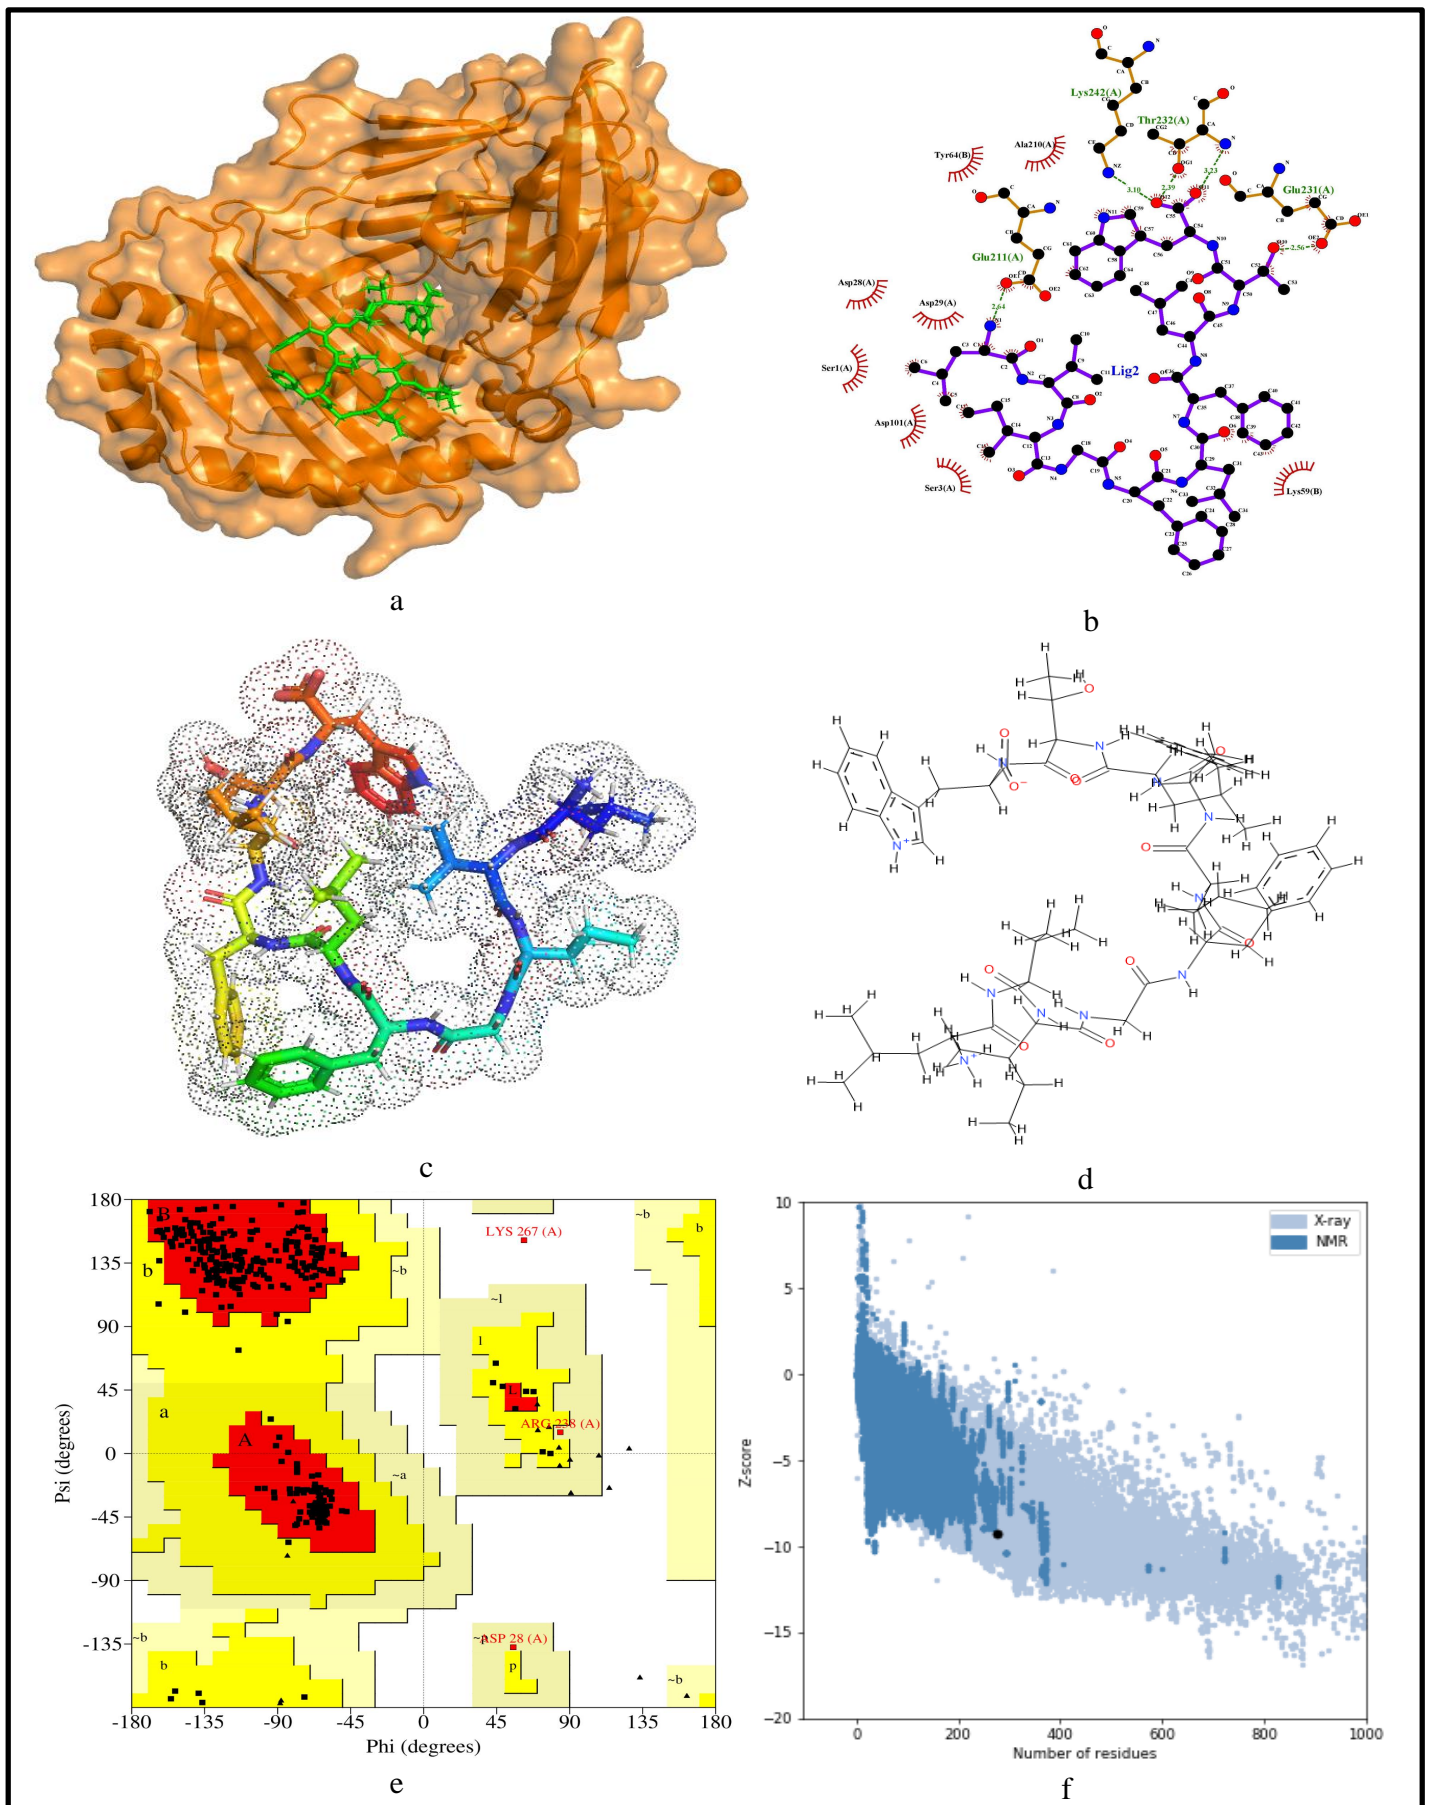

Figure S24: Structural analysis for MHC-I restricted T-cell epitope "LVIGFLFTW" (a) Docking structure of MHC-I restricted T-cell epitope (b) 2D pose representation between the epitope and HLA allele showing the different non-covalent bonds (c) 3D structure of the epitope (d) Chemical structure of the epitope (e) Ramachandran plot of the epitope allele structure showing lower energy sites of the residues in different frames and (f) Z-Score plot

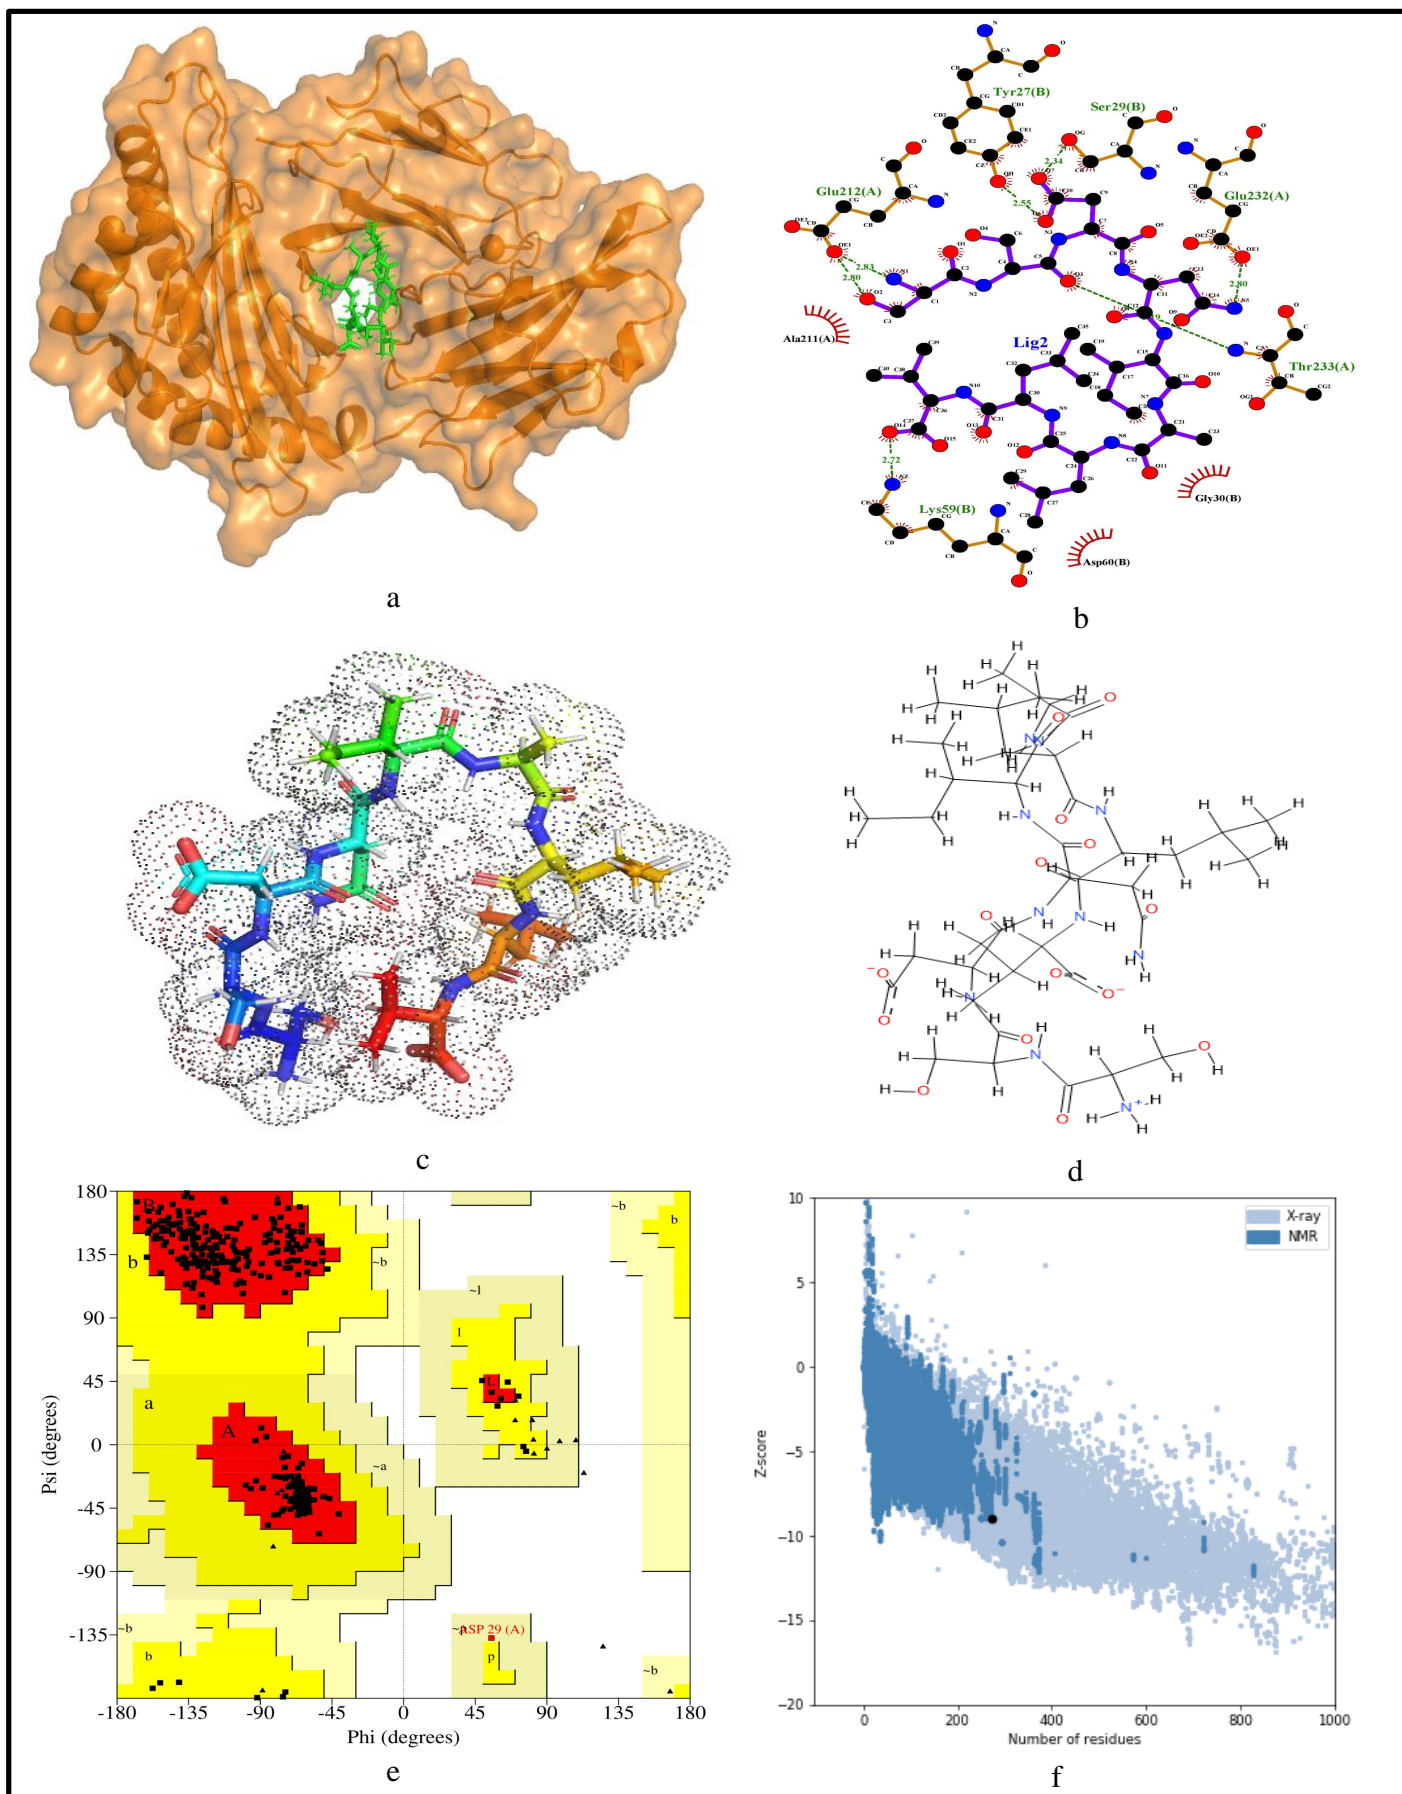

Figure S25: Structural analysis for MHC-I restricted T-cell epitope "SSDNIALLV" (a) Docking structure of MHC-I restricted T-cell epitope (b) 2D pose representation between the epitope and HLA allele showing the different non-covalent bonds (c) 3D structure of the epitope (d) Chemical structure of the epitope (e) Ramachandran plot of the epitope allele structure showing lower energy sites of the residues in different frames and (f) Z-Score plot

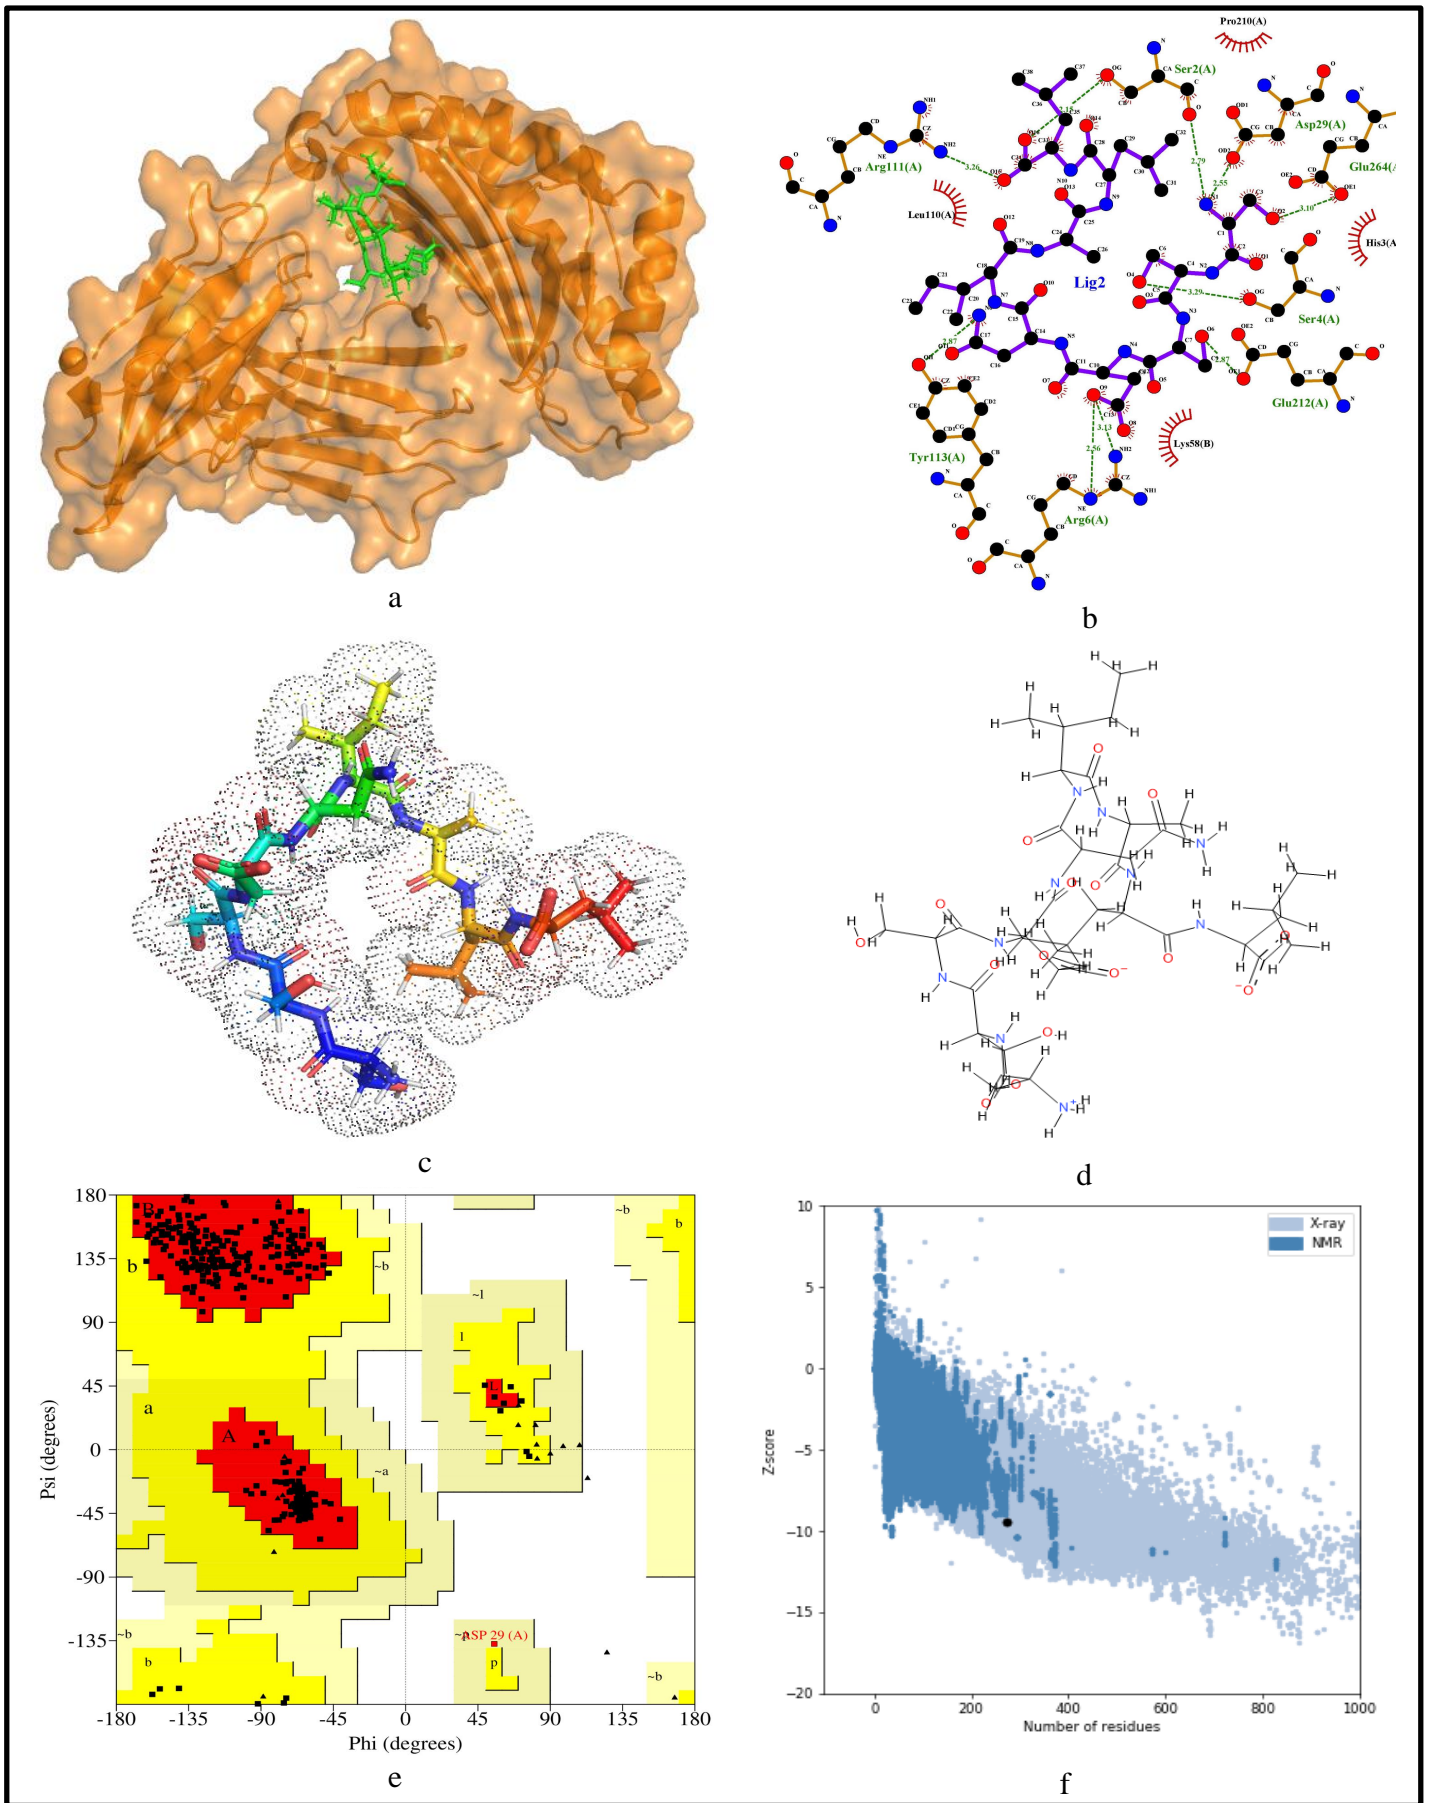

Figure S26: Structural analysis for MHC-I restricted T-cell epitope "SSSDNIALL" (a) Docking structure of MHC-I restricted T-cell epitope (b) 2D pose representation between the epitope and HLA allele showing the different non-covalent bonds (c) 3D structure of the epitope (d) Chemical structure of the epitope (e) Ramachandran plot of the epitope allele structure showing lower energy sites of the residues in different frames and (f) Z-Score plot

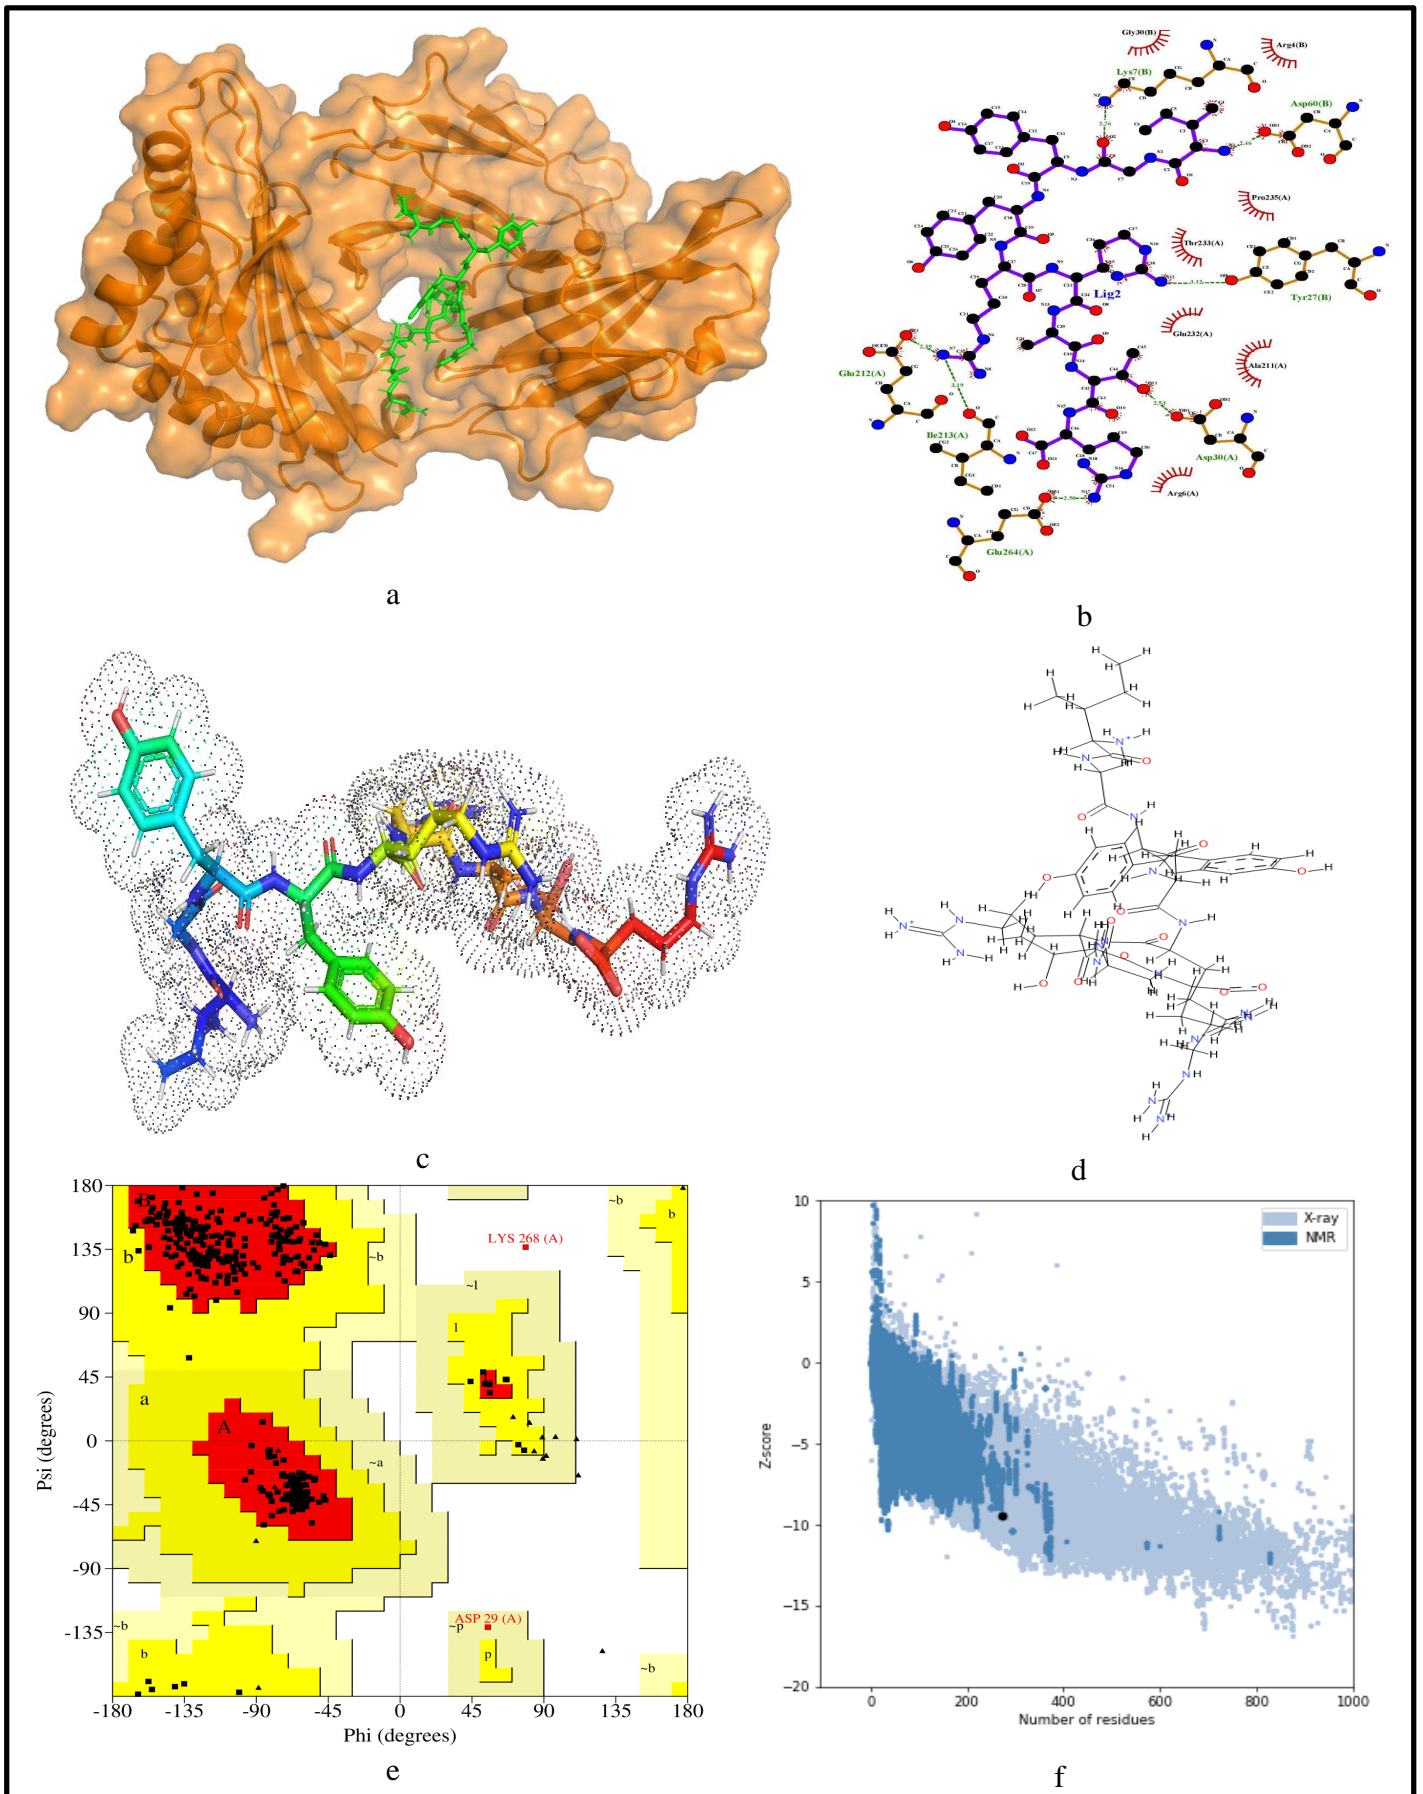

Figure S27: Structural analysis for MHC-I restricted T-cell epitope "GYRRATRR" (a) Docking structure of MHC-I restricted T-cell epitope (b) 2D pose representation between the epitope and HLA allele showing the different non-covalent bonds (c) 3D structure of the epitope (d) Chemical structure of the epitope (e) Ramachandran plot of the epitope allele structure showing lower energy sites of the residues in different frames and (f) Z-Score plot

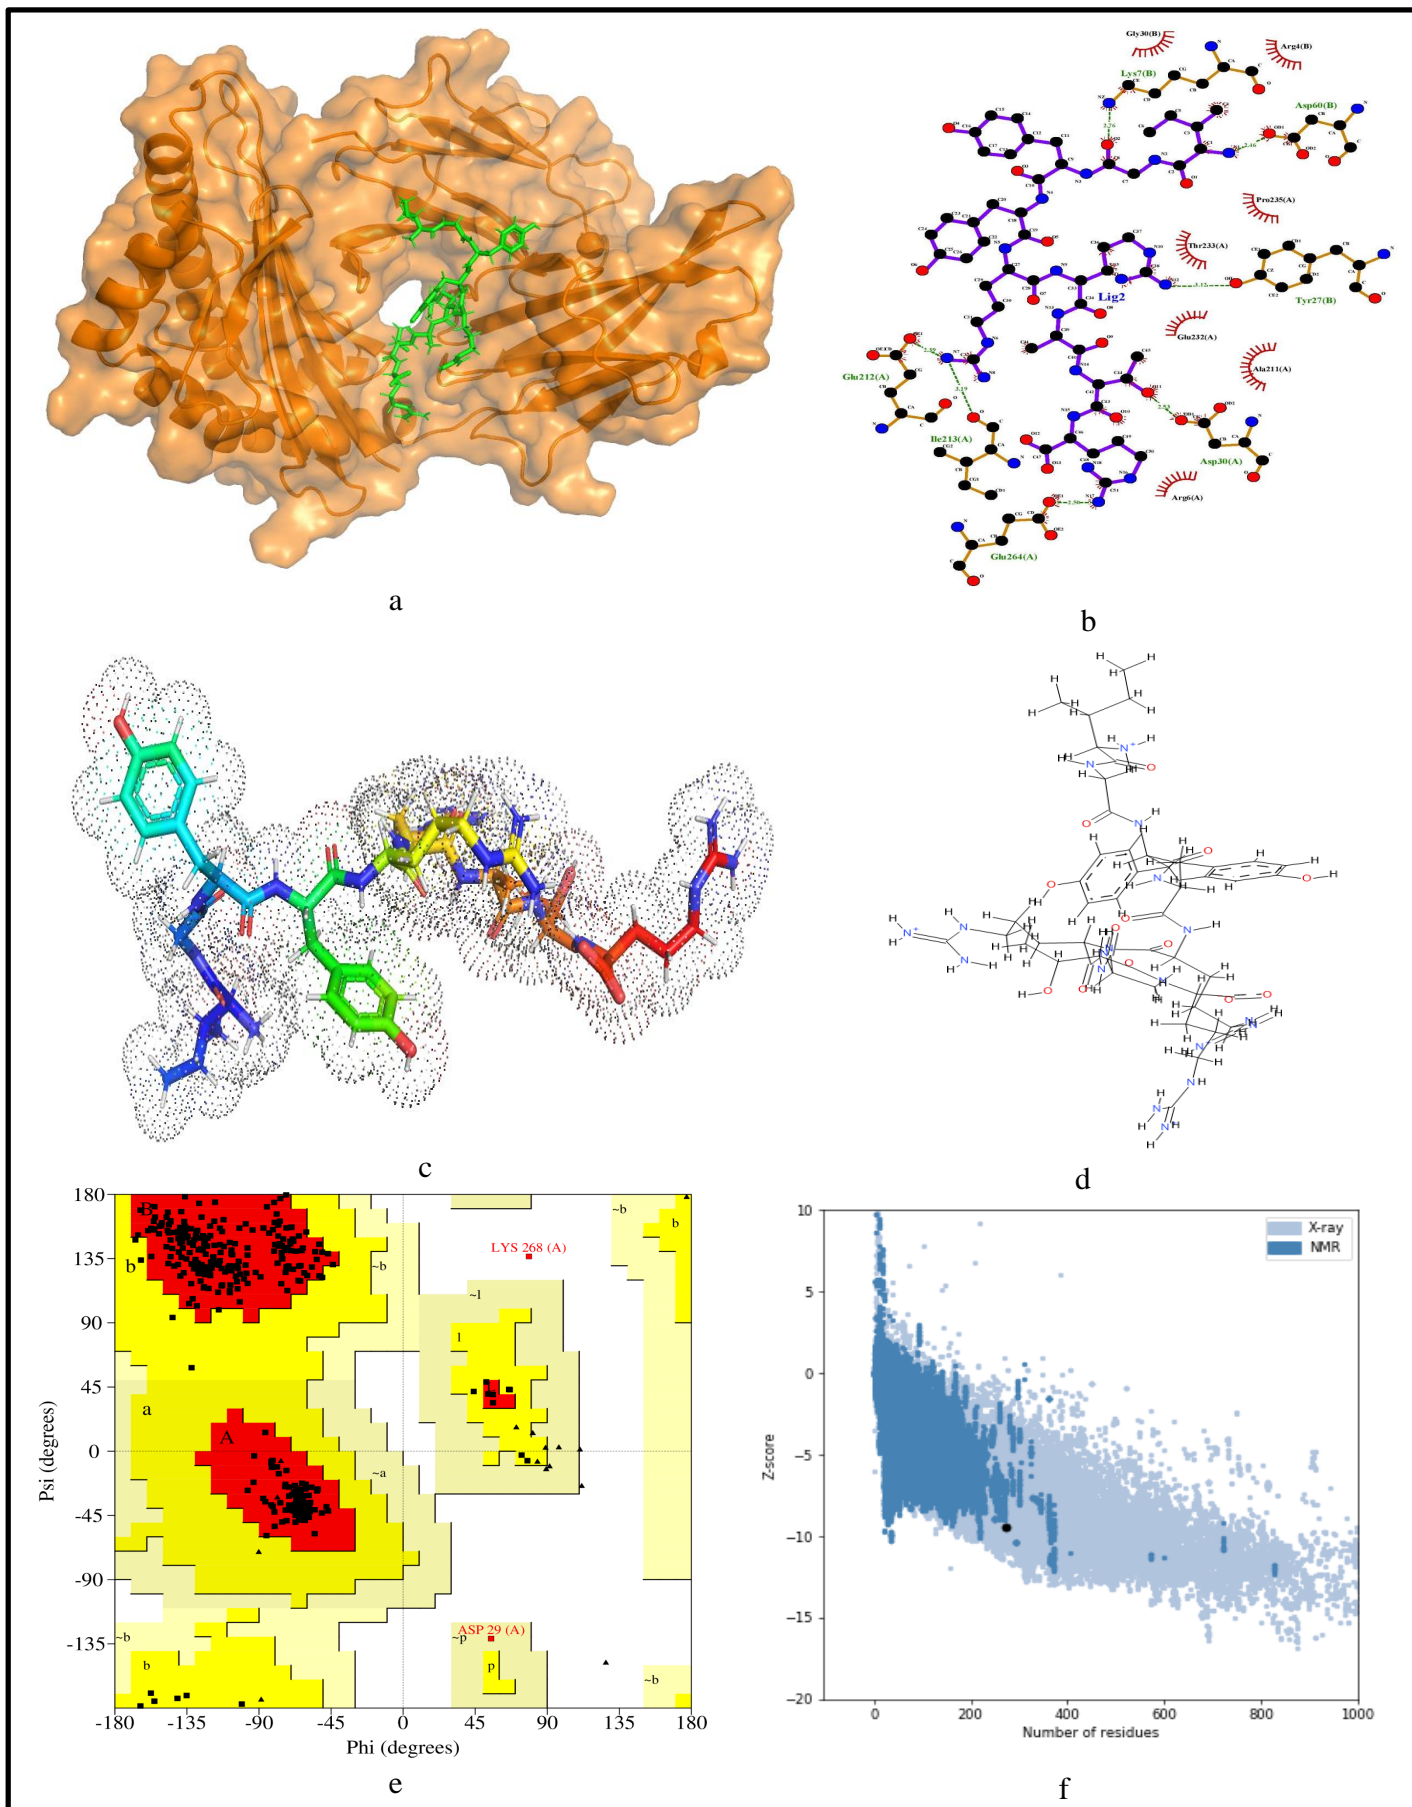

Figure S28: Structural analysis for MHC-I restricted T-cell epitope "IGYYRRATR" (a) Docking structure of MHC-I restricted T-cell epitope (b) 2D pose representation between the epitope and HLA allele showing the different non-covalent bonds (c) 3D structure of the epitope (d) Chemical structure of the epitope (e) Ramachandran plot of the epitope allele structure showing lower energy sites of the residues in different frames and (f) Z-Score plot

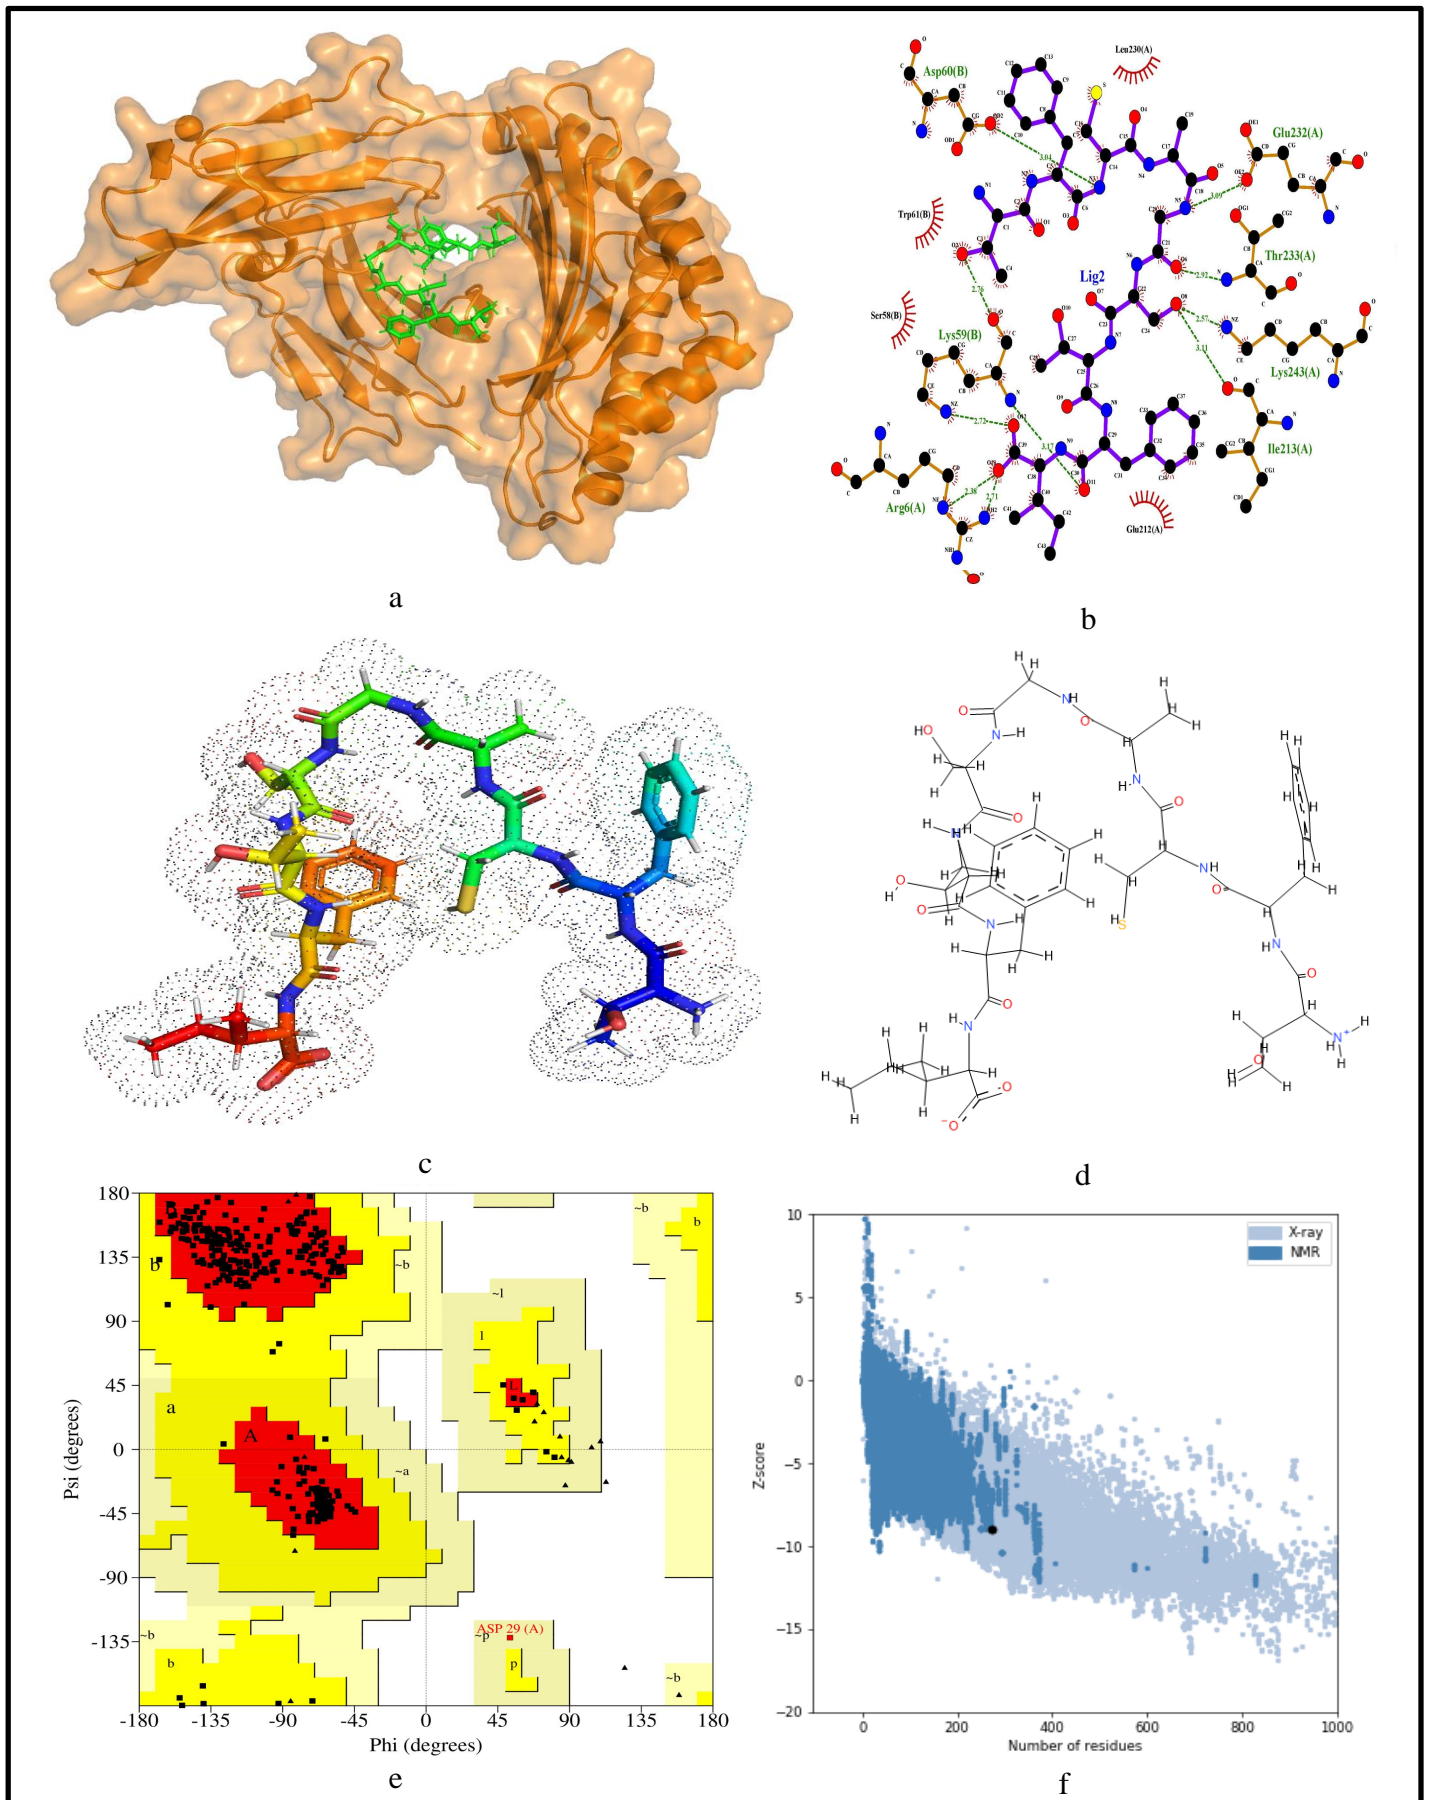

Figure S29: Structural analysis for MHC-II restricted T-cell epitope "FCAGSTFISDEVAR" (a) Docking structure of MHC-I restricted T-cell epitope (b) 2D pose representation between the epitope and HLA allele showing the different non-covalent bonds (c) 3D structure of the epitope (d) Chemical structure of the epitope (e) Ramachandran plot of the epitope allele structure showing lower energy sites of the residues in different frames and (f) Z-Score plot

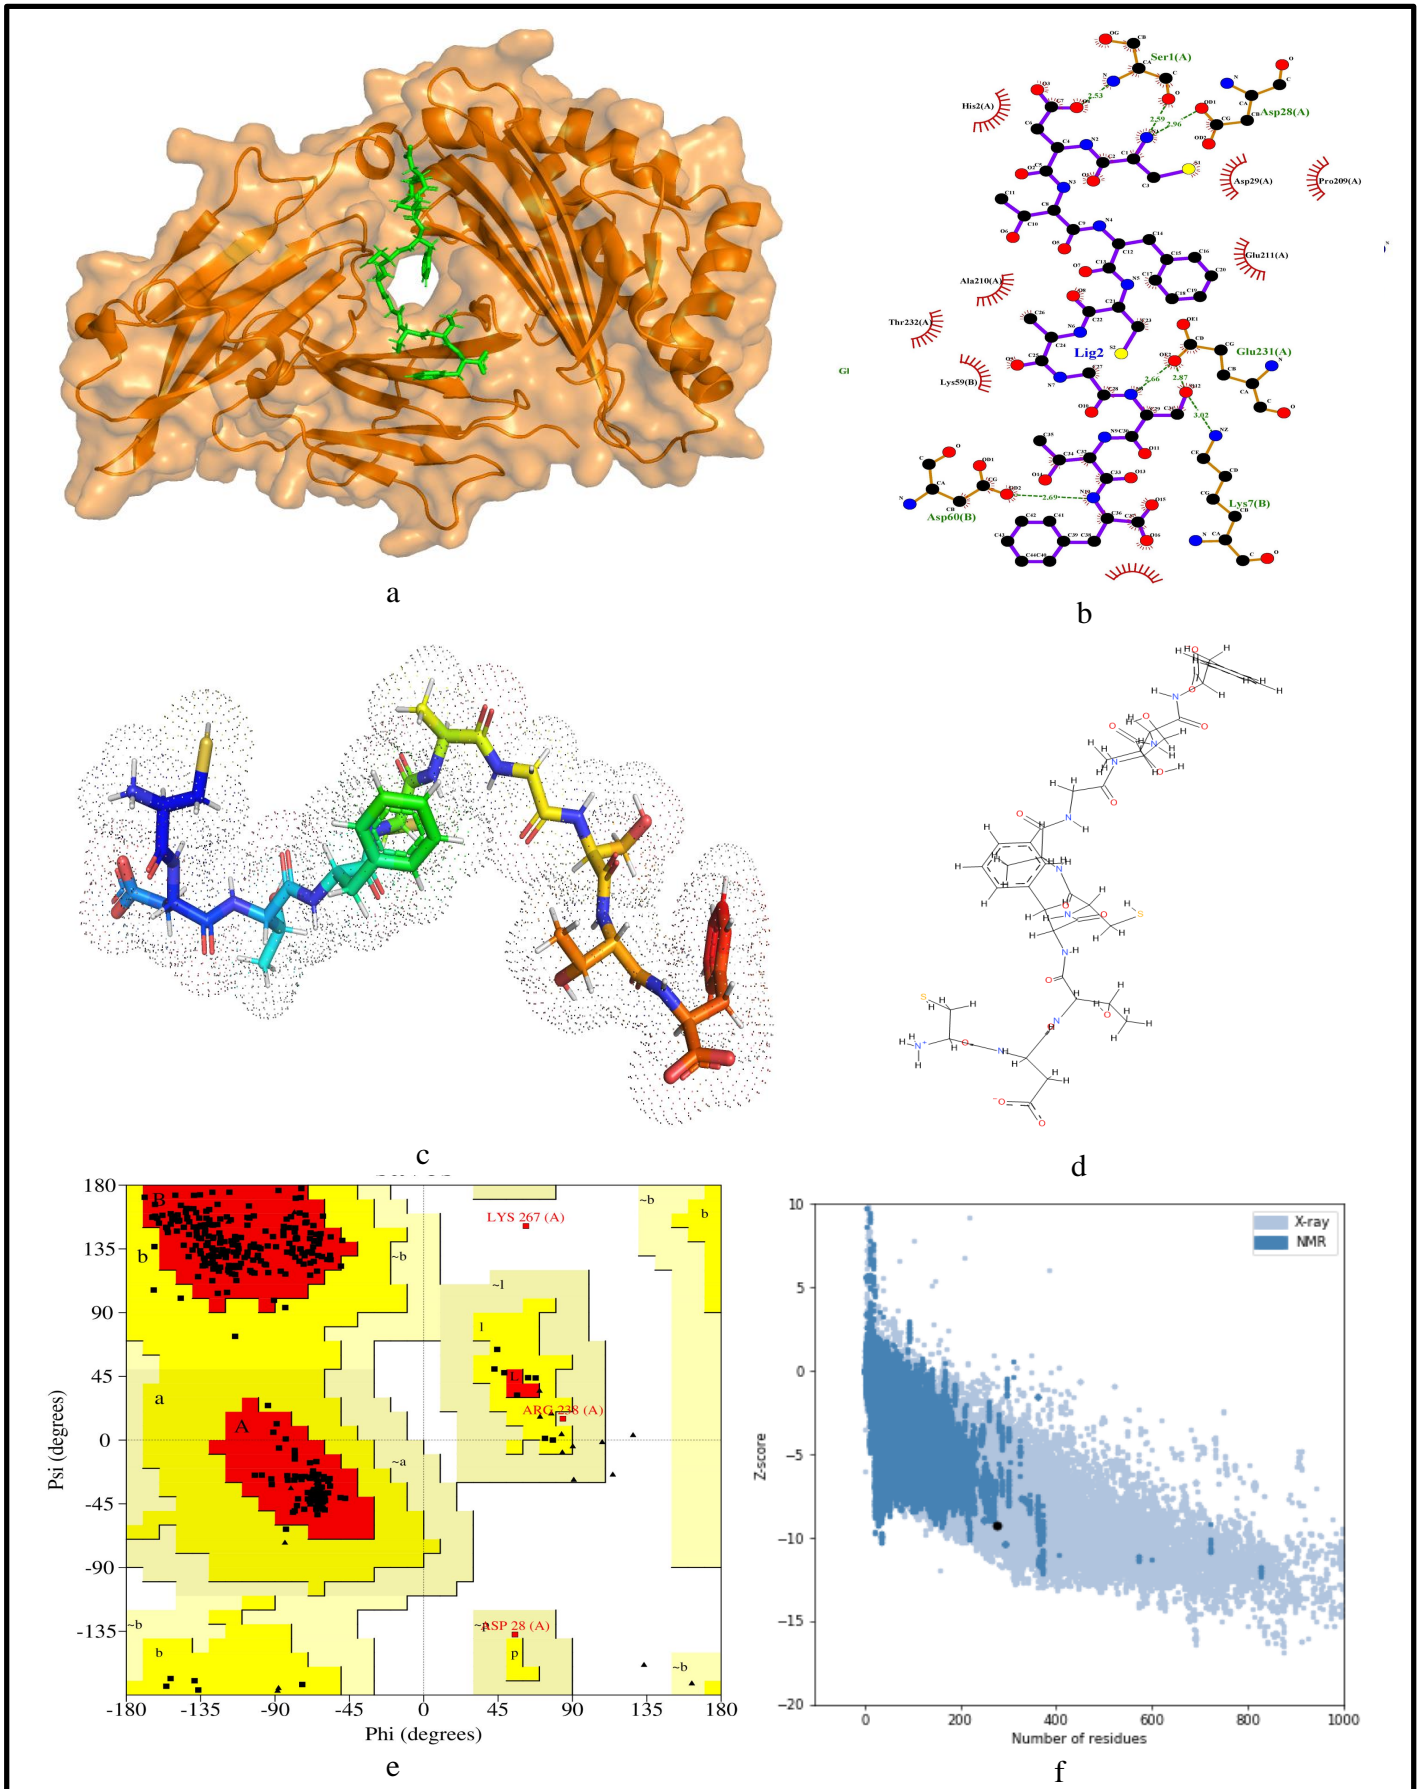

Figure S30: Structural analysis for MHC-II restricted T-cell epitope "DTFCAGSTFISDEA" (a) Docking structure of MHC-I restricted T-cell epitope (b) 2D pose representation between the epitope and HLA allele showing the different non-covalent bonds (c) 3D structure of the epitope (d) Chemical structure of the epitope (e) Ramachandran plot of the epitope allele structure showing lower energy sites of the residues in different frames and (f) Z-Score plot



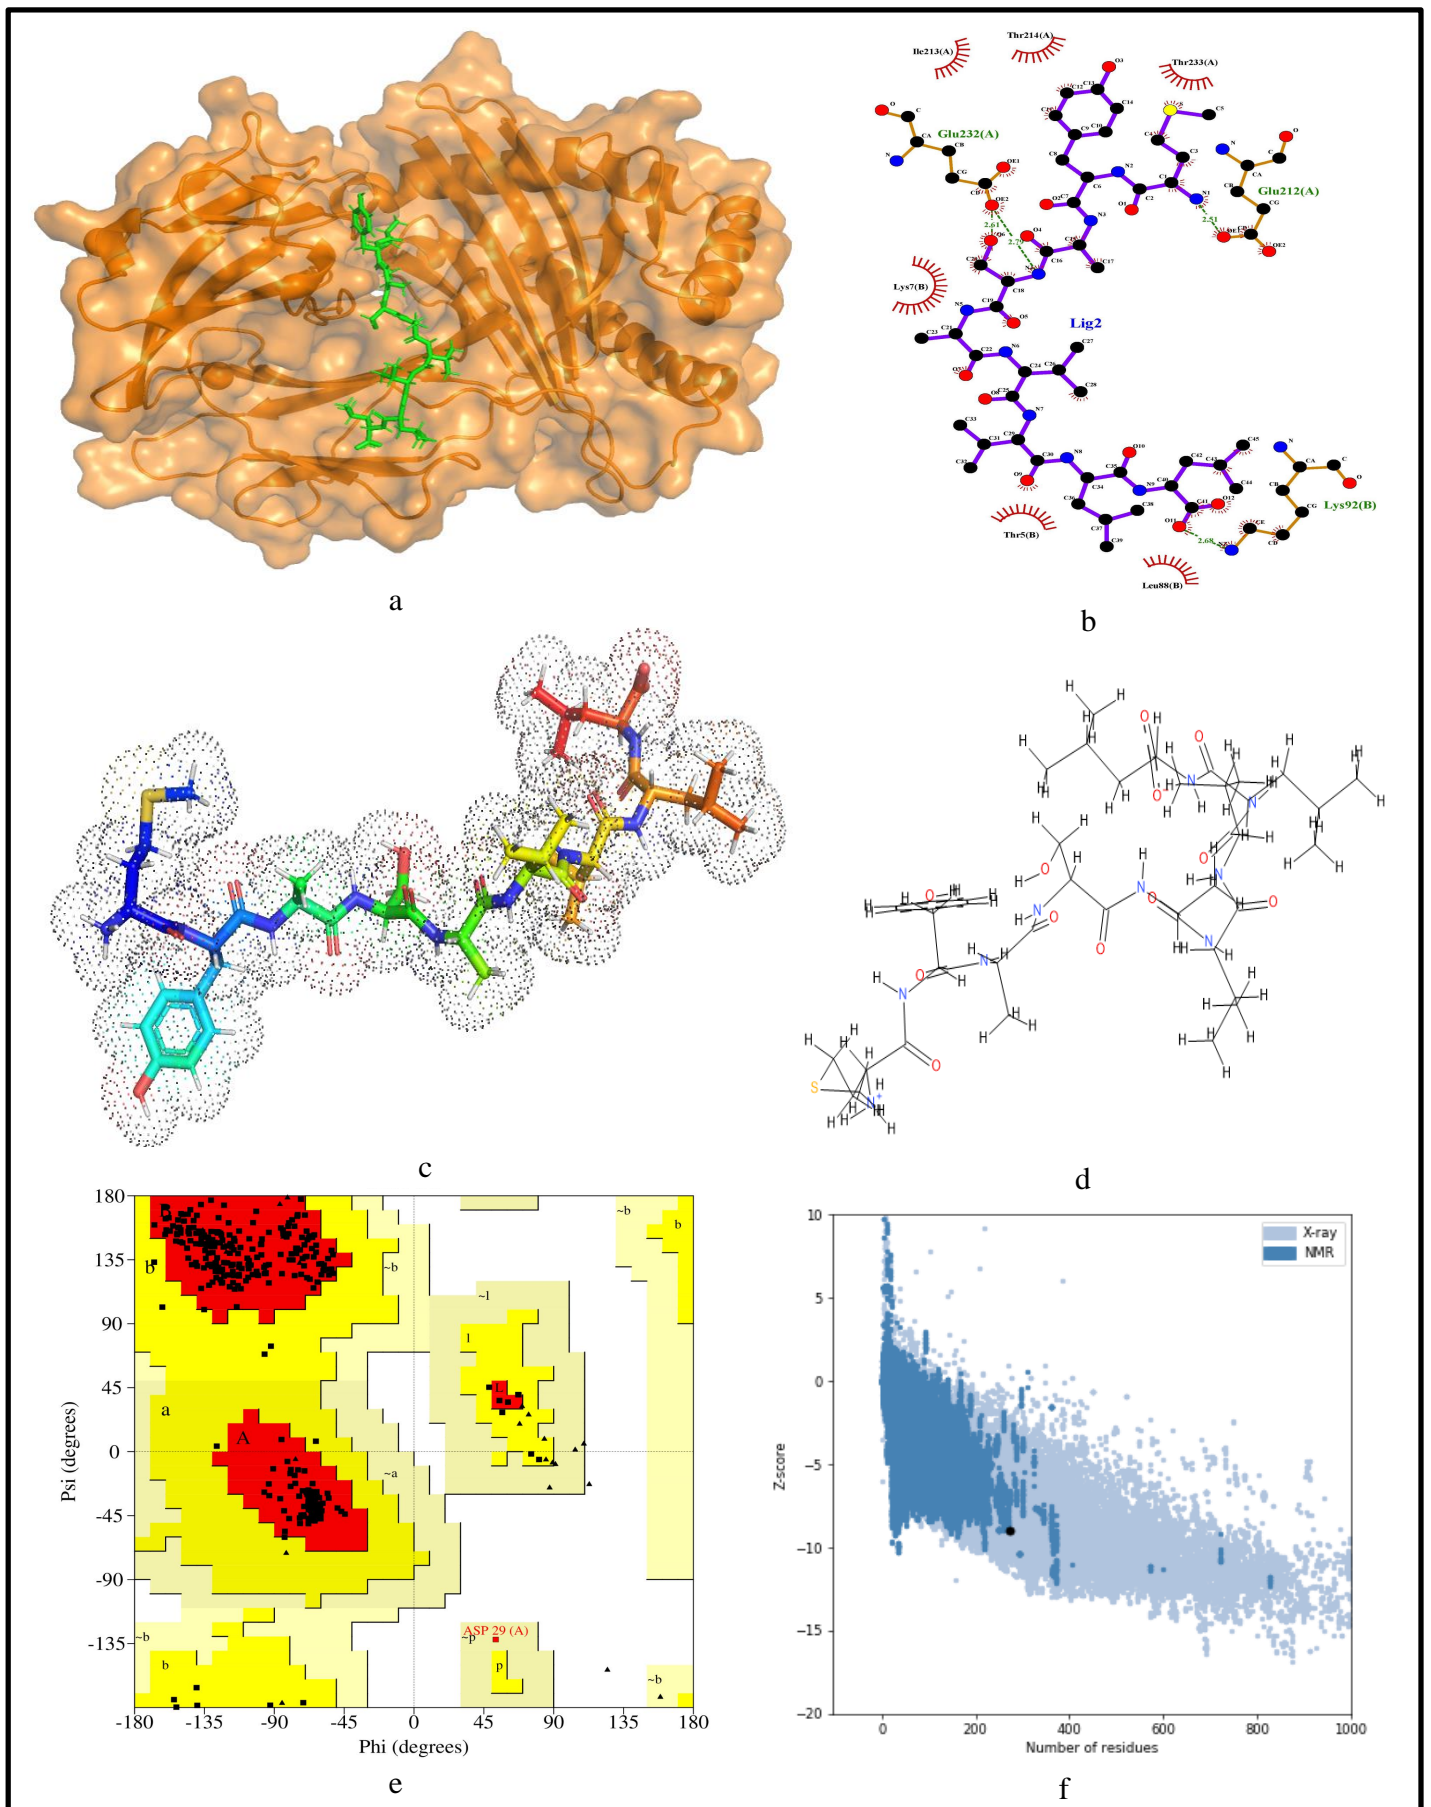

Figure S31: Structural analysis for MHC-II restricted T-cell epitope "ASAVVLLILMTARTV" (a) Docking structure of MHC-I restricted T-cell epitope (b) 2D pose representation between the epitope and HLA allele showing the different non-covalent bonds (c) 3D structure of the epitope (d) Chemical structure of the epitope (e) Ramachandran plot of the epitope allele structure showing lower energy sites of the residues in different frames and (f) Z-Score plot

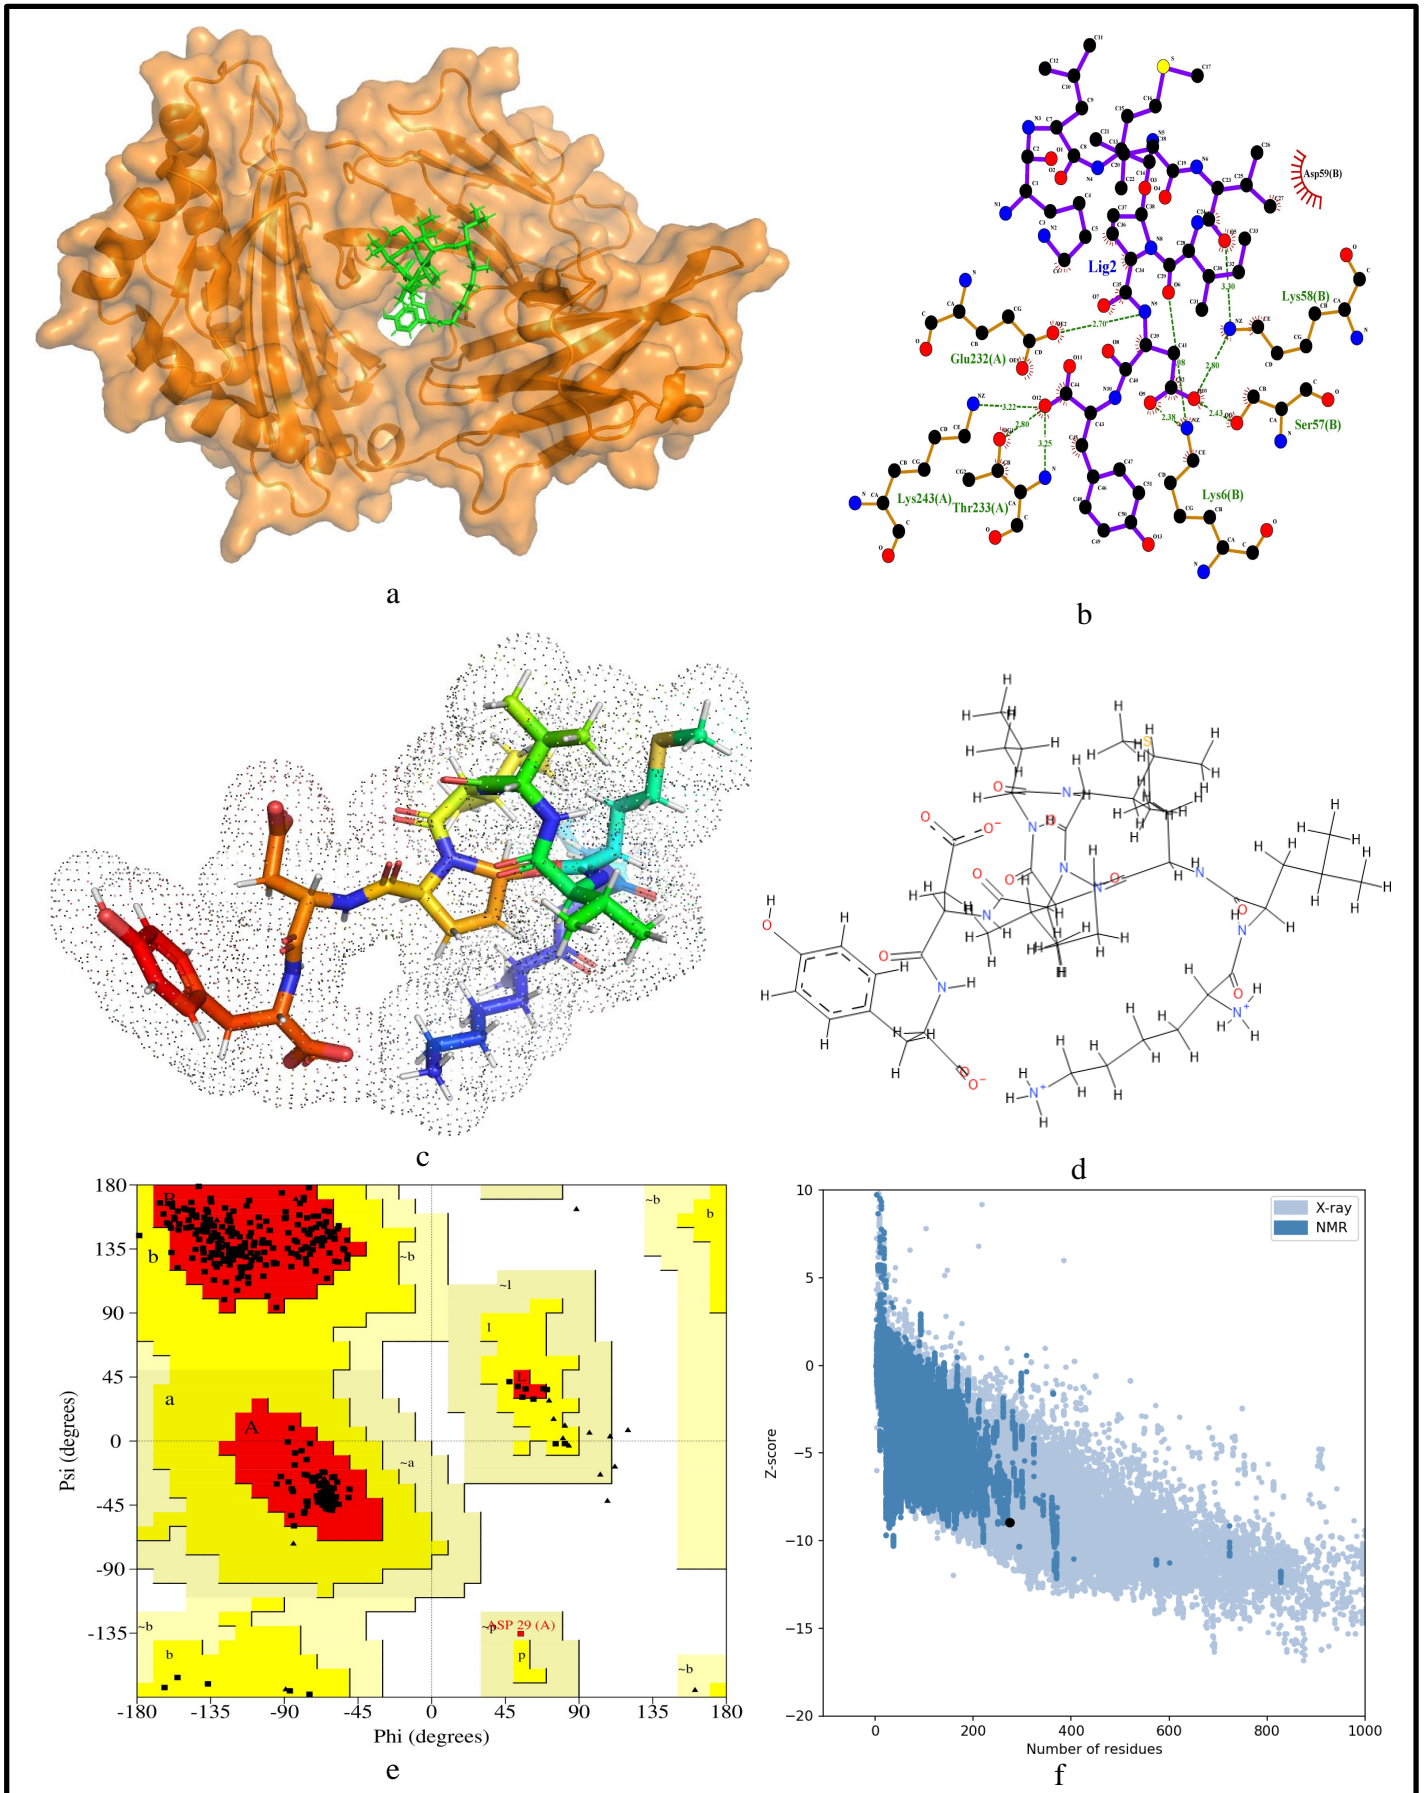

Figure S32: Structural analysis for MHC-II restricted T-cell epitope "LNIPLTTAAKLMVV" (a) Docking structure of MHC-I restricted T-cell epitope (b) 2D pose representation between the epitope and HLA allele showing the different non-covalent bonds (c) 3D structure of the epitope (d) Chemical structure of the epitope (e) Ramachandran plot of the epitope allele structure showing lower energy sites of the residues in different frames and (f) Z-Score plot

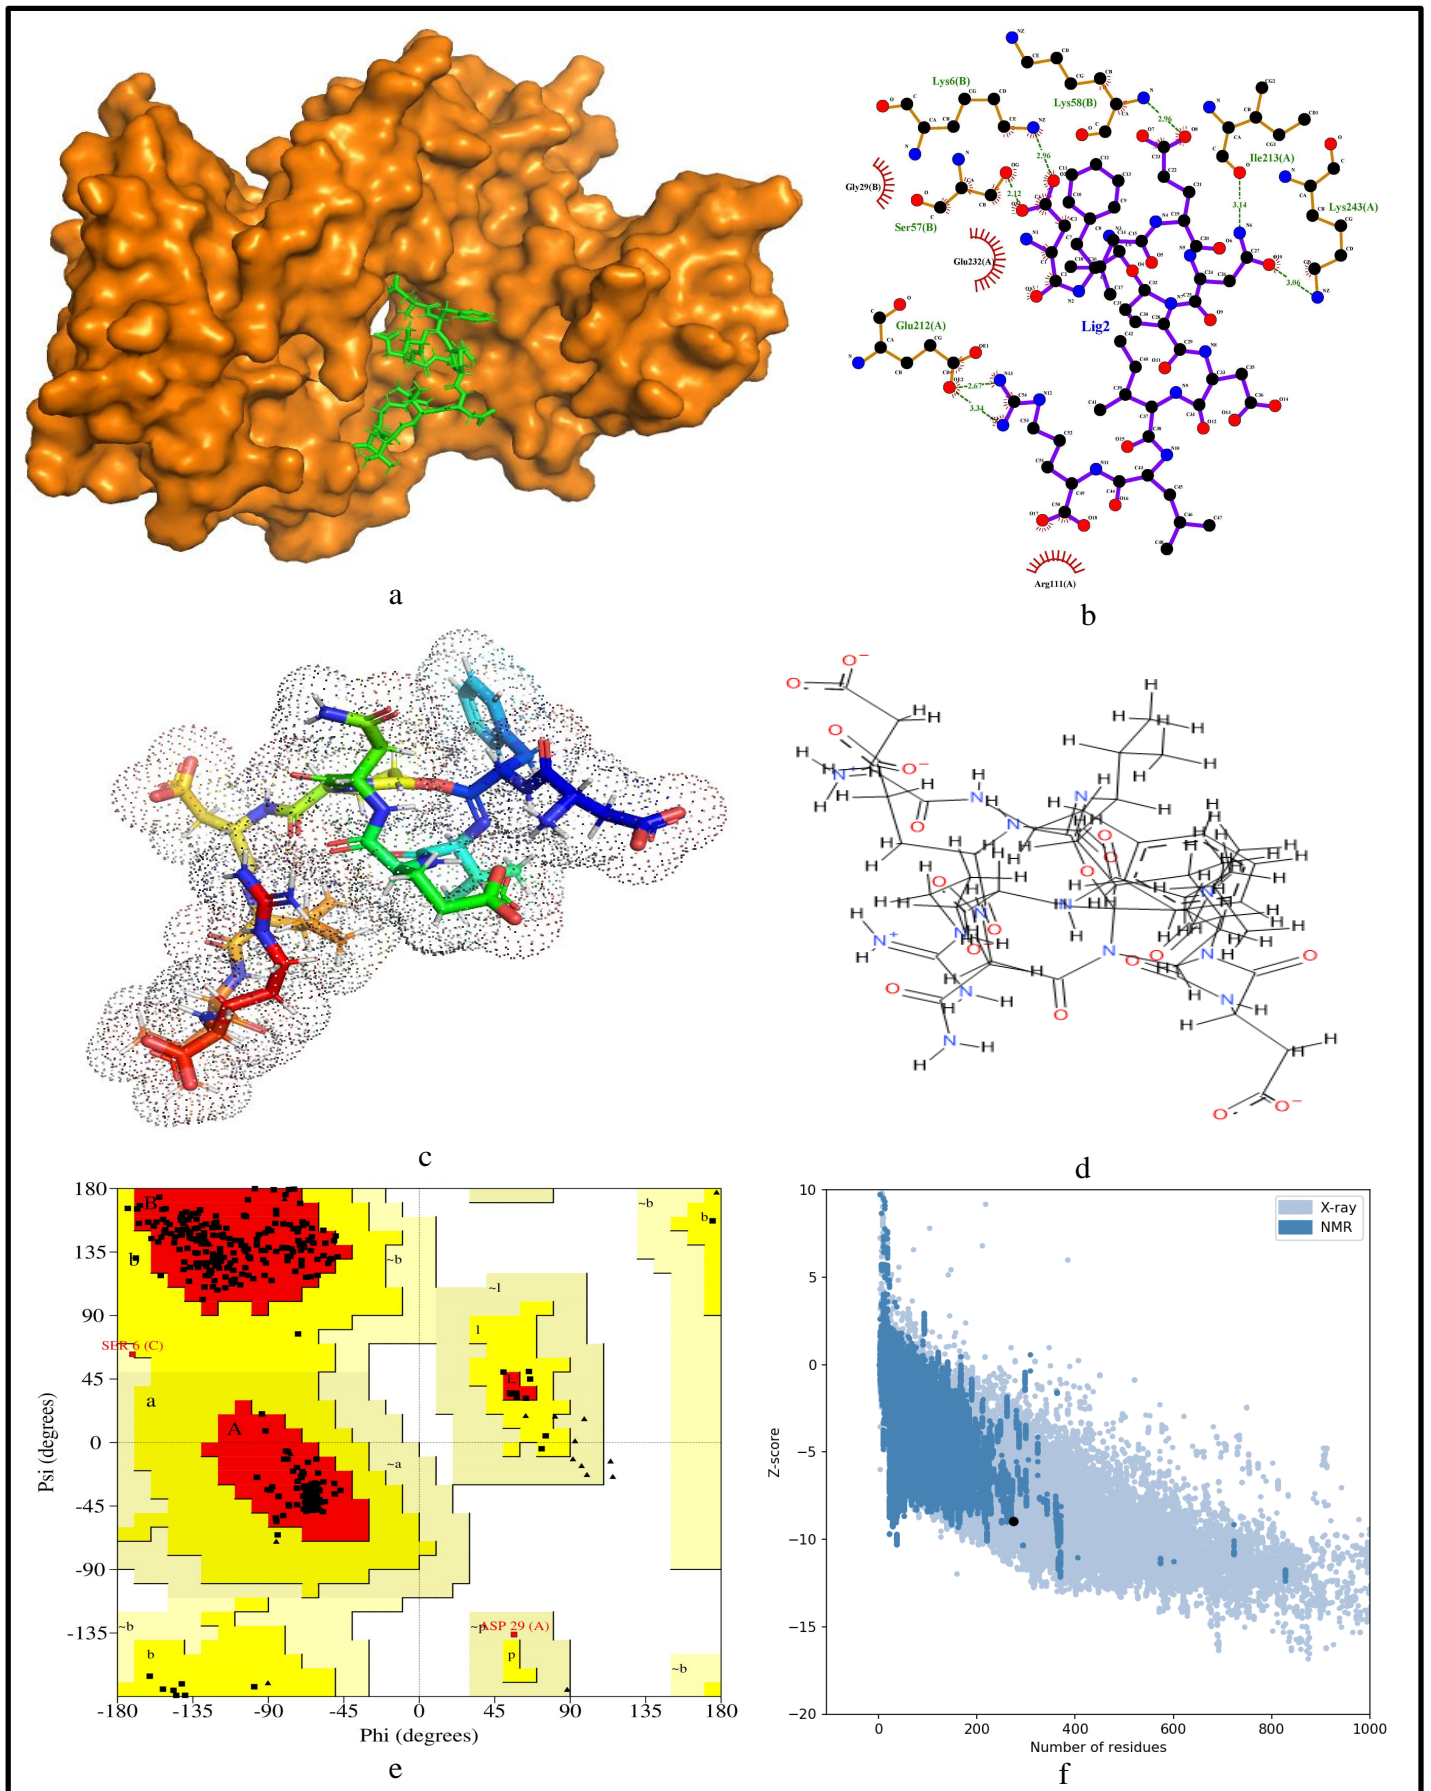

Figure S33: Structural analysis for MHC-II restricted T-cell epitope "ILRVYANLGERVRQA" (a) Docking structure of MHC-I restricted T-cell epitope (b) 2D pose representation between the epitope and HLA allele showing the different non-covalent bonds (c) 3D structure of the epitope (d) Chemical structure of the epitope (e) Ramachandran plot of the epitope allele structure showing lower energy sites of the residues in different frames and (f) Z-Score plot

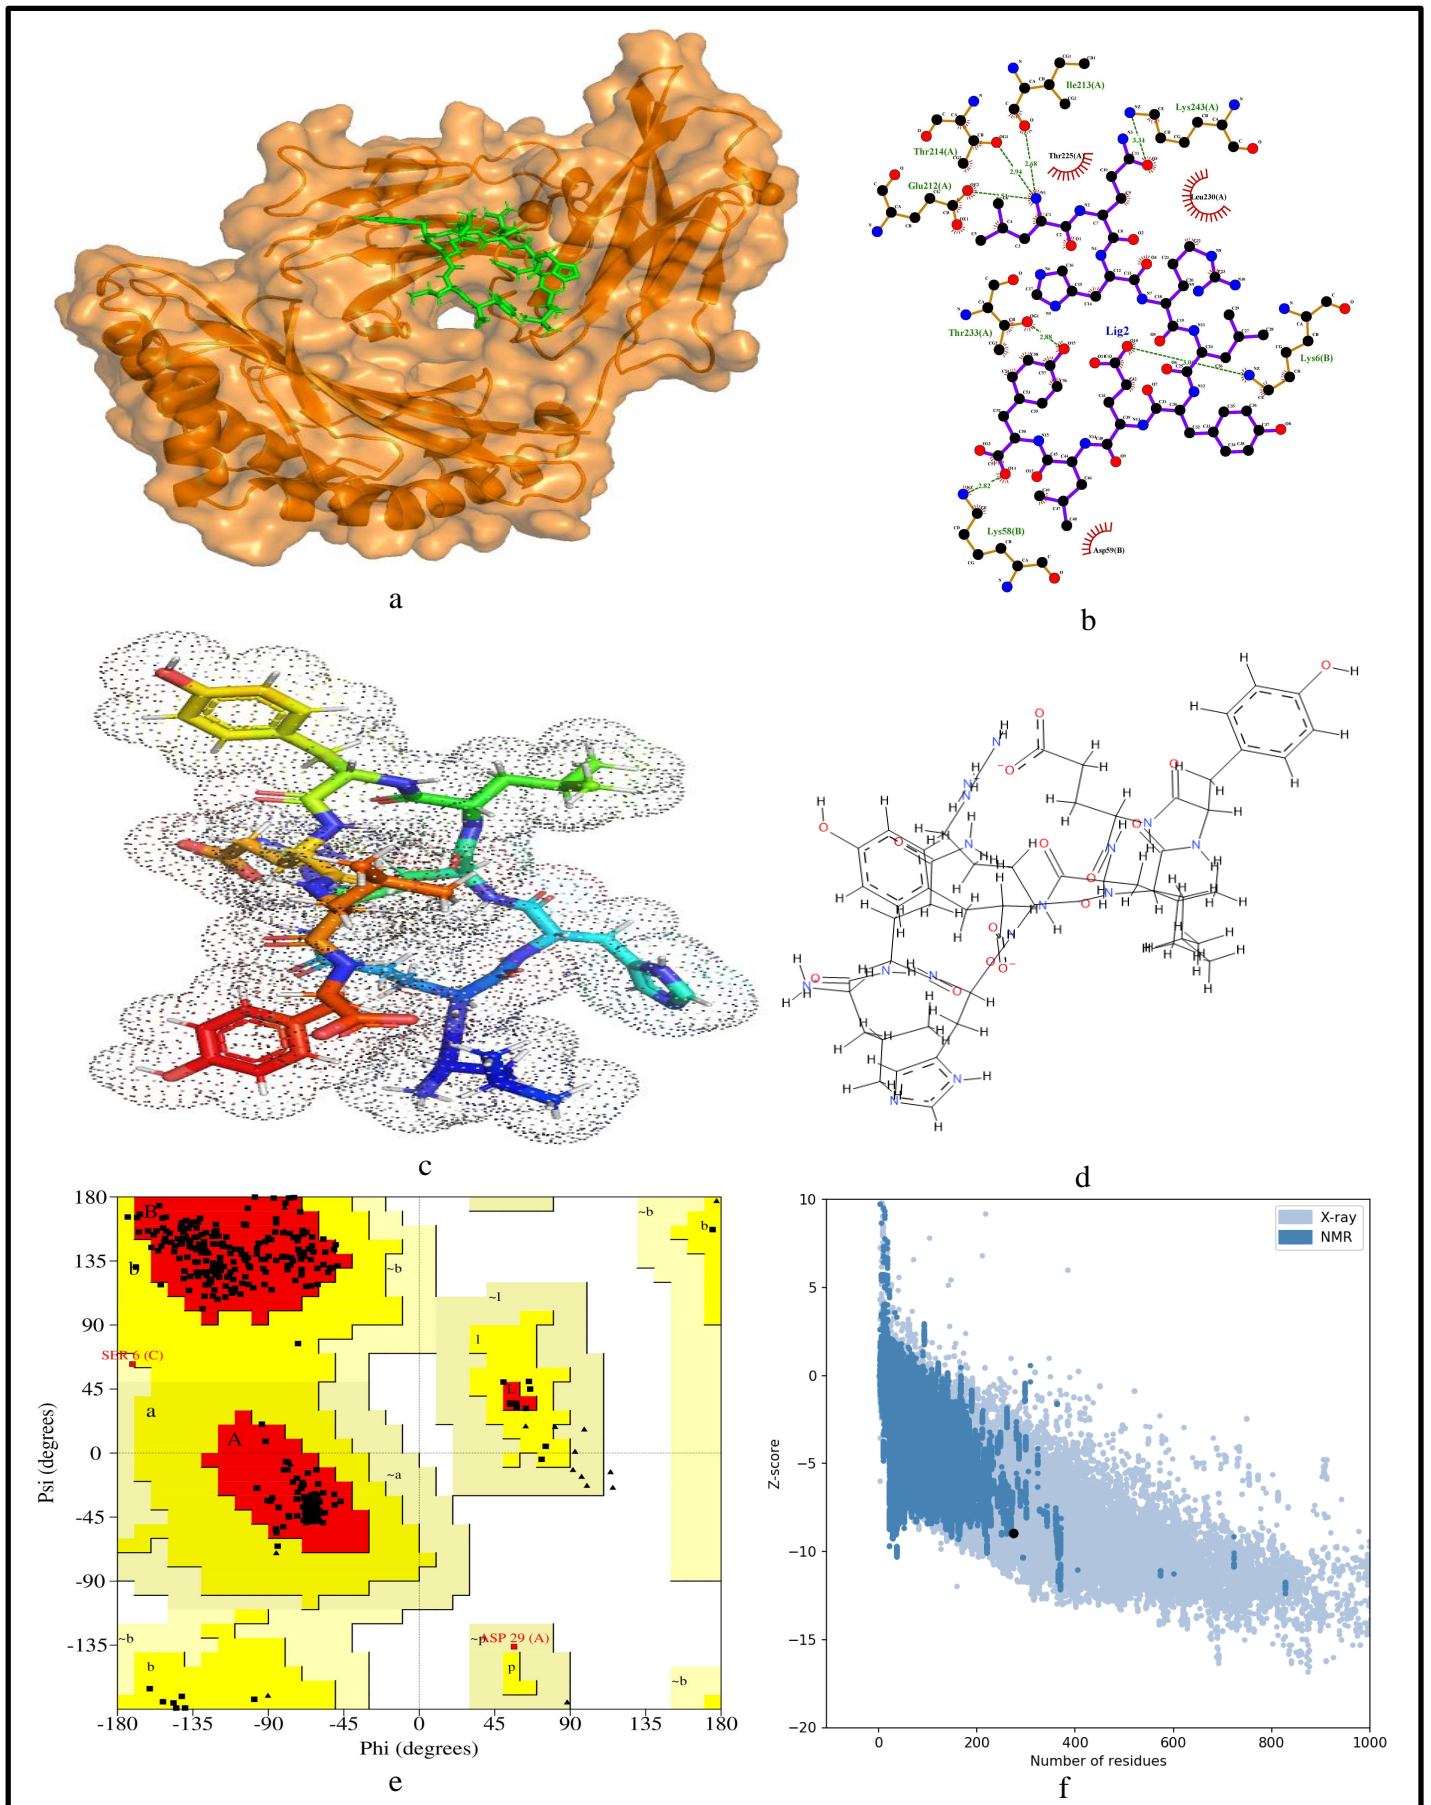

Figure S34: Structural analysis for MHC-II restricted T-cell epitope "RNRDVDTDFVNEFYA" (a) Docking structure of MHC-I restricted T-cell epitope (b) 2D pose representation between the epitope and HLA allele showing the different non-covalent bonds (c) 3D structure of the epitope (d) Chemical structure of the epitope (e) Ramachandran plot of the epitope allele structure showing lower energy sites of the residues in different frames and (f) Z-Score plot

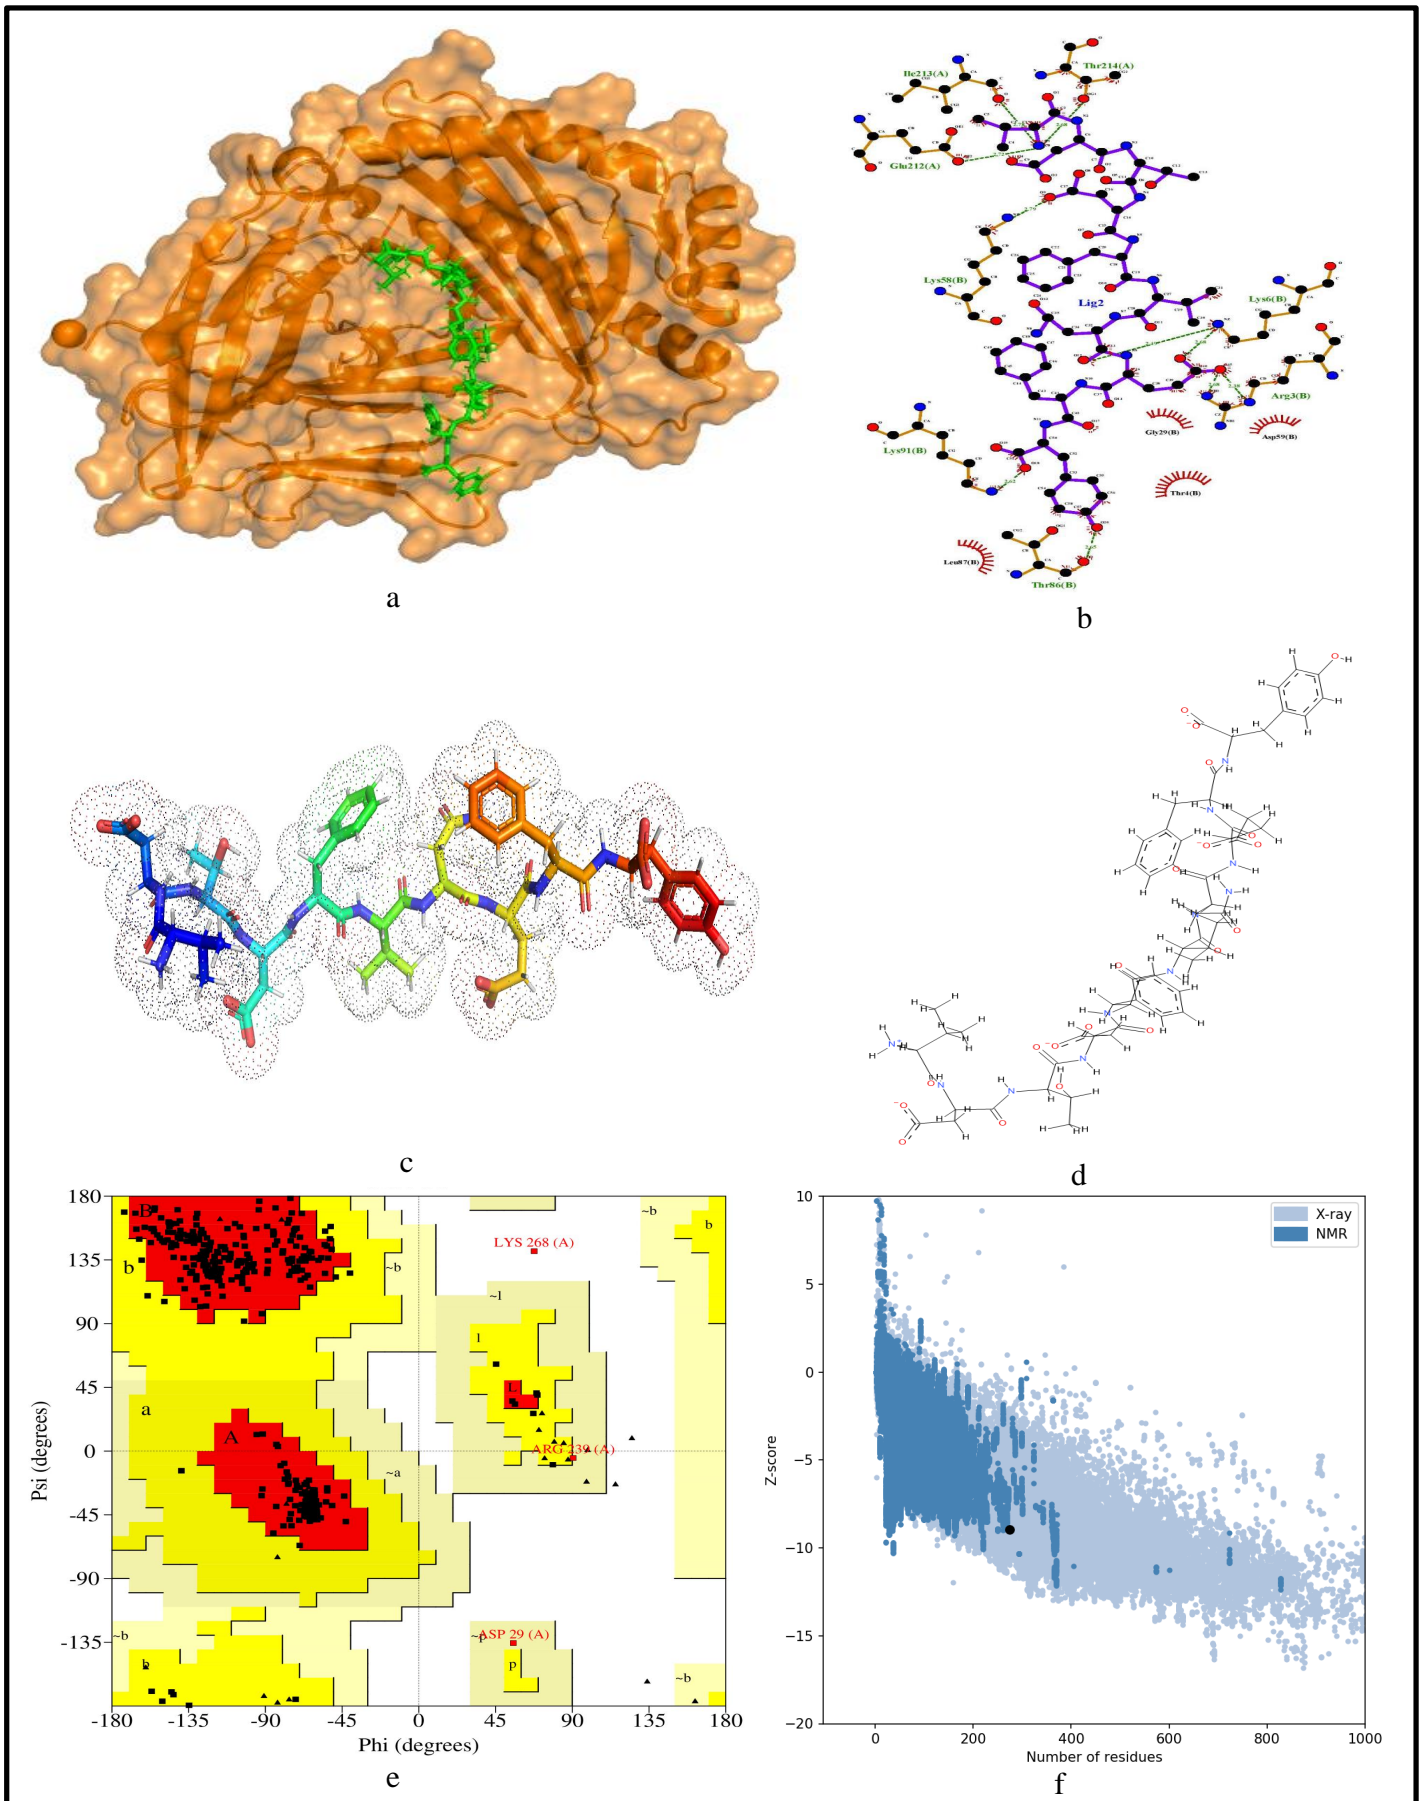

Figure S35: Structural analysis for MHC-II restricted T-cell epitope "YRNRDVDITDFVNEFY" (a) Docking structure of MHC-I restricted T-cell epitope (b) 2D pose representation between the epitope and HLA allele showing the different non-covalent bonds (c) 3D structure of the epitope (d) Chemical structure of the epitope (e) Ramachandran plot of the epitope allele structure showing lower energy sites of the residues in different frames and (f) Z-Score plot

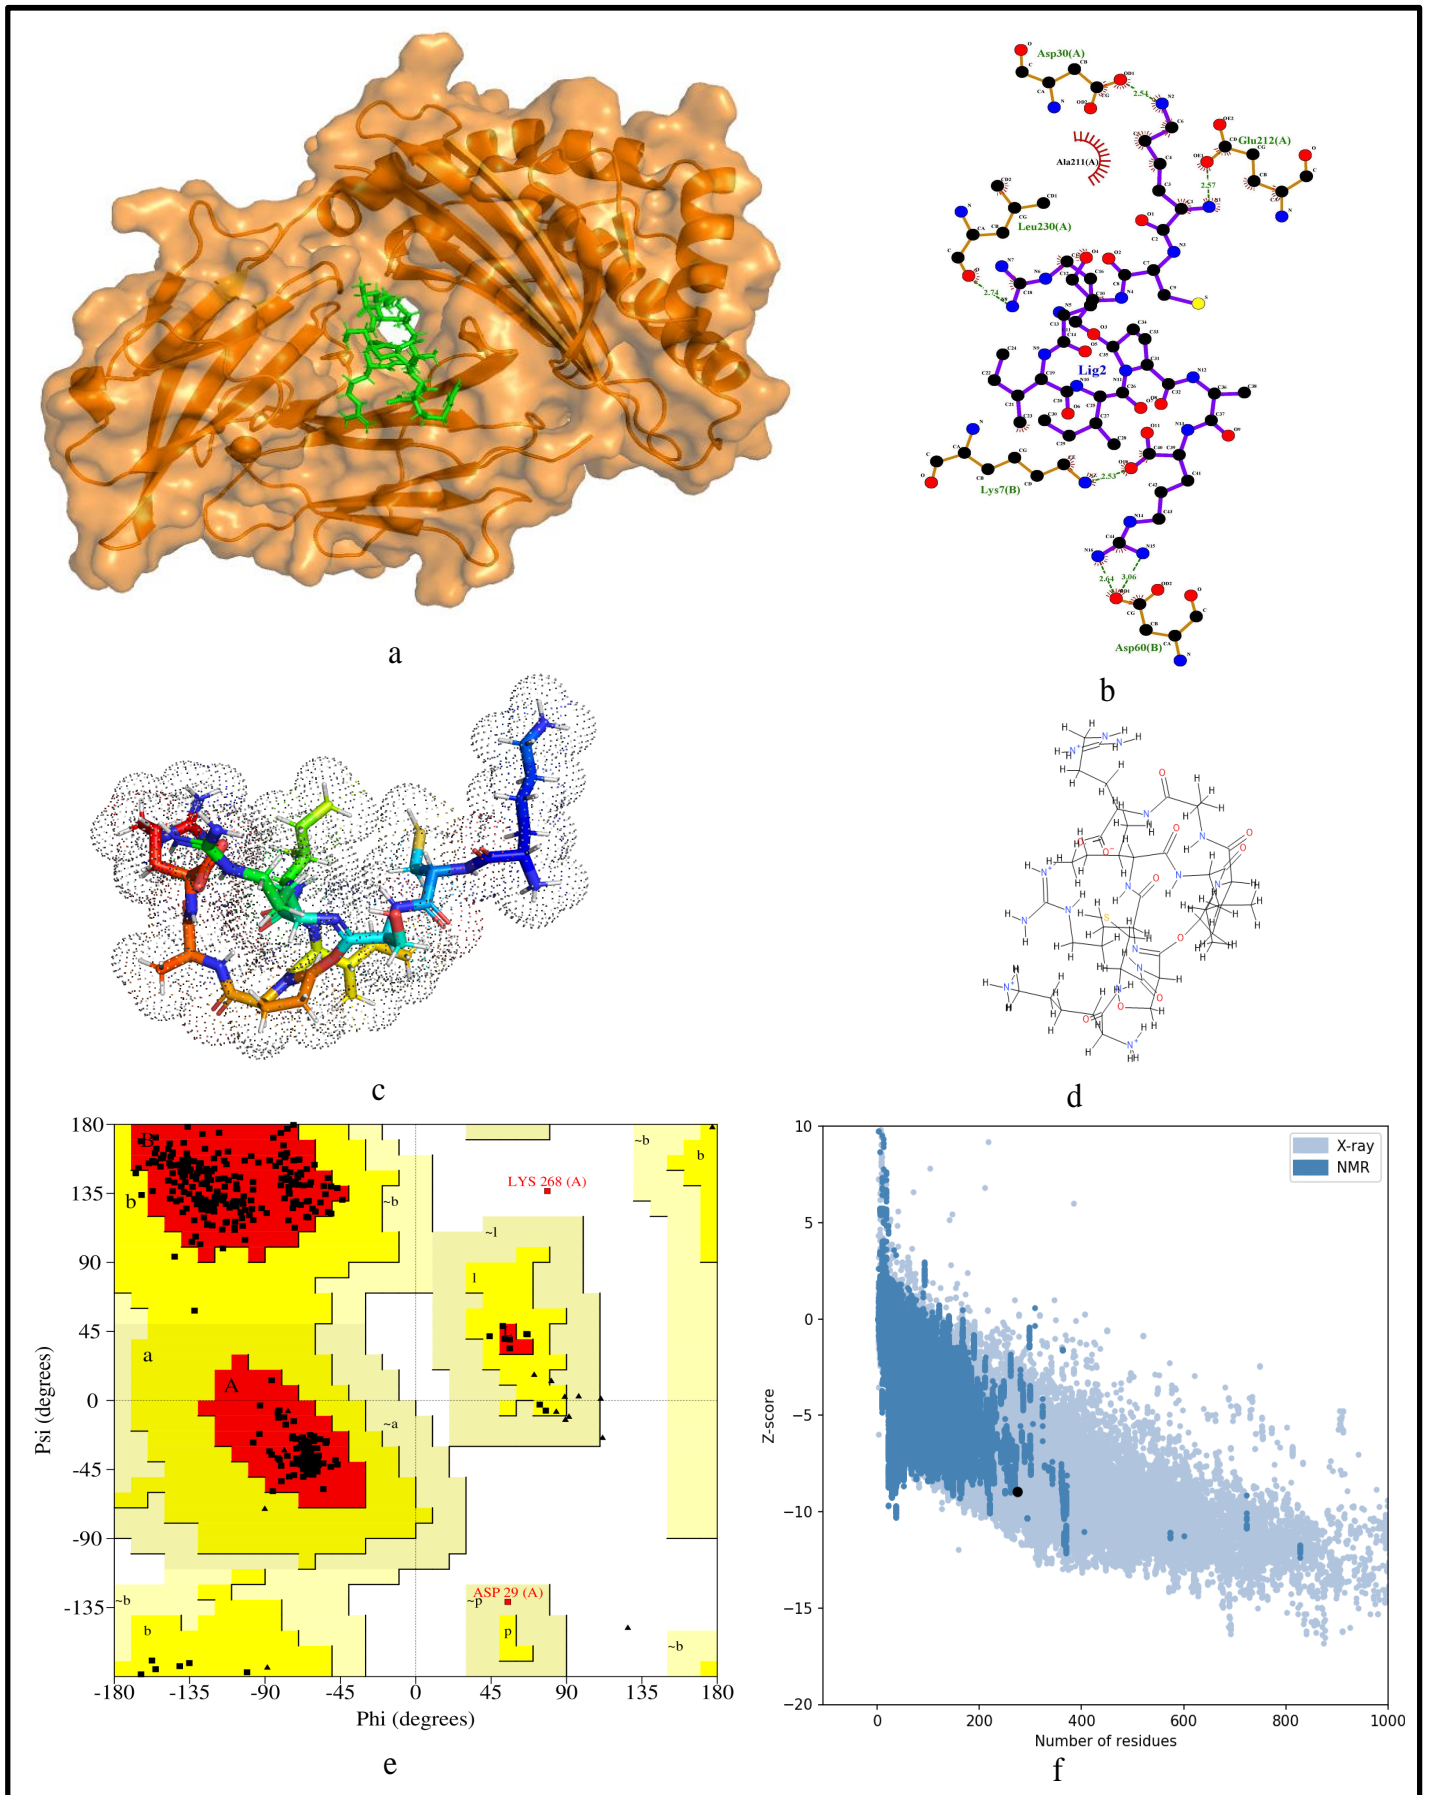

Figure S36: Structural analysis for MHC-II restricted T-cell epitope "ECFDKFKVNSTLEQY" (a) Docking structure of MHC-I restricted T-cell epitope (b) 2D pose representation between the epitope and HLA allele showing the different non-covalent bonds (c) 3D structure of the epitope (d) Chemical structure of the epitope (e) Ramachandran plot of the epitope allele structure showing lower energy sites of the residues in different frames and (f) Z-Score plot

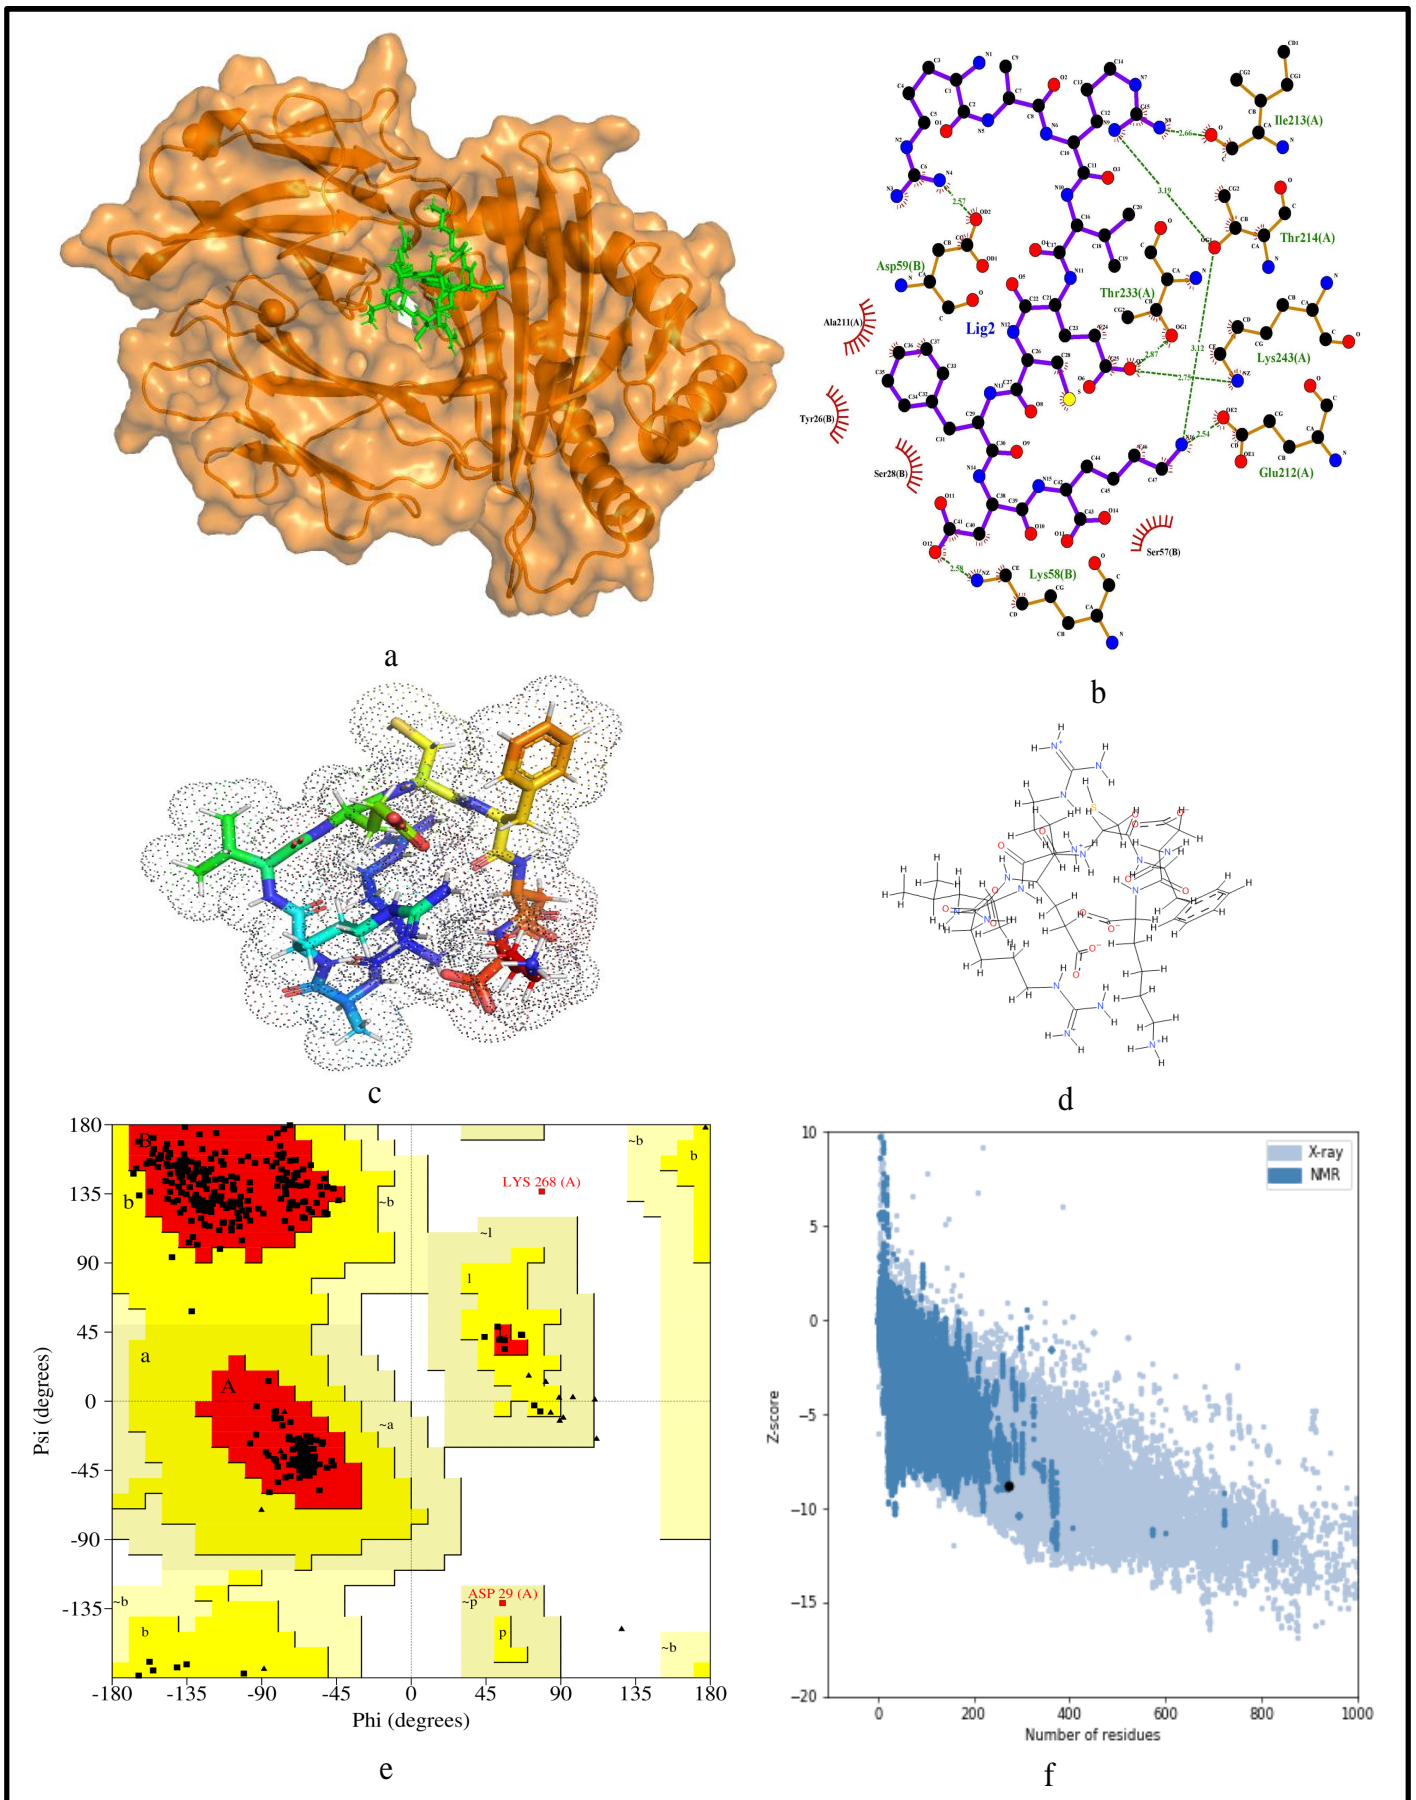

Figure S37: Structural analysis for MHC-II restricted T-cell epitope "KCSRIIPARARVECF" (a) Docking structure of MHC-I restricted T-cell epitope (b) 2D pose representation between the epitope and HLA allele showing the different non-covalent bonds (c) 3D structure of the epitope (d) Chemical structure of the epitope (e) Ramachandran plot of the epitope allele structure showing lower energy sites of the residues in different frames and (f) Z-Score plot

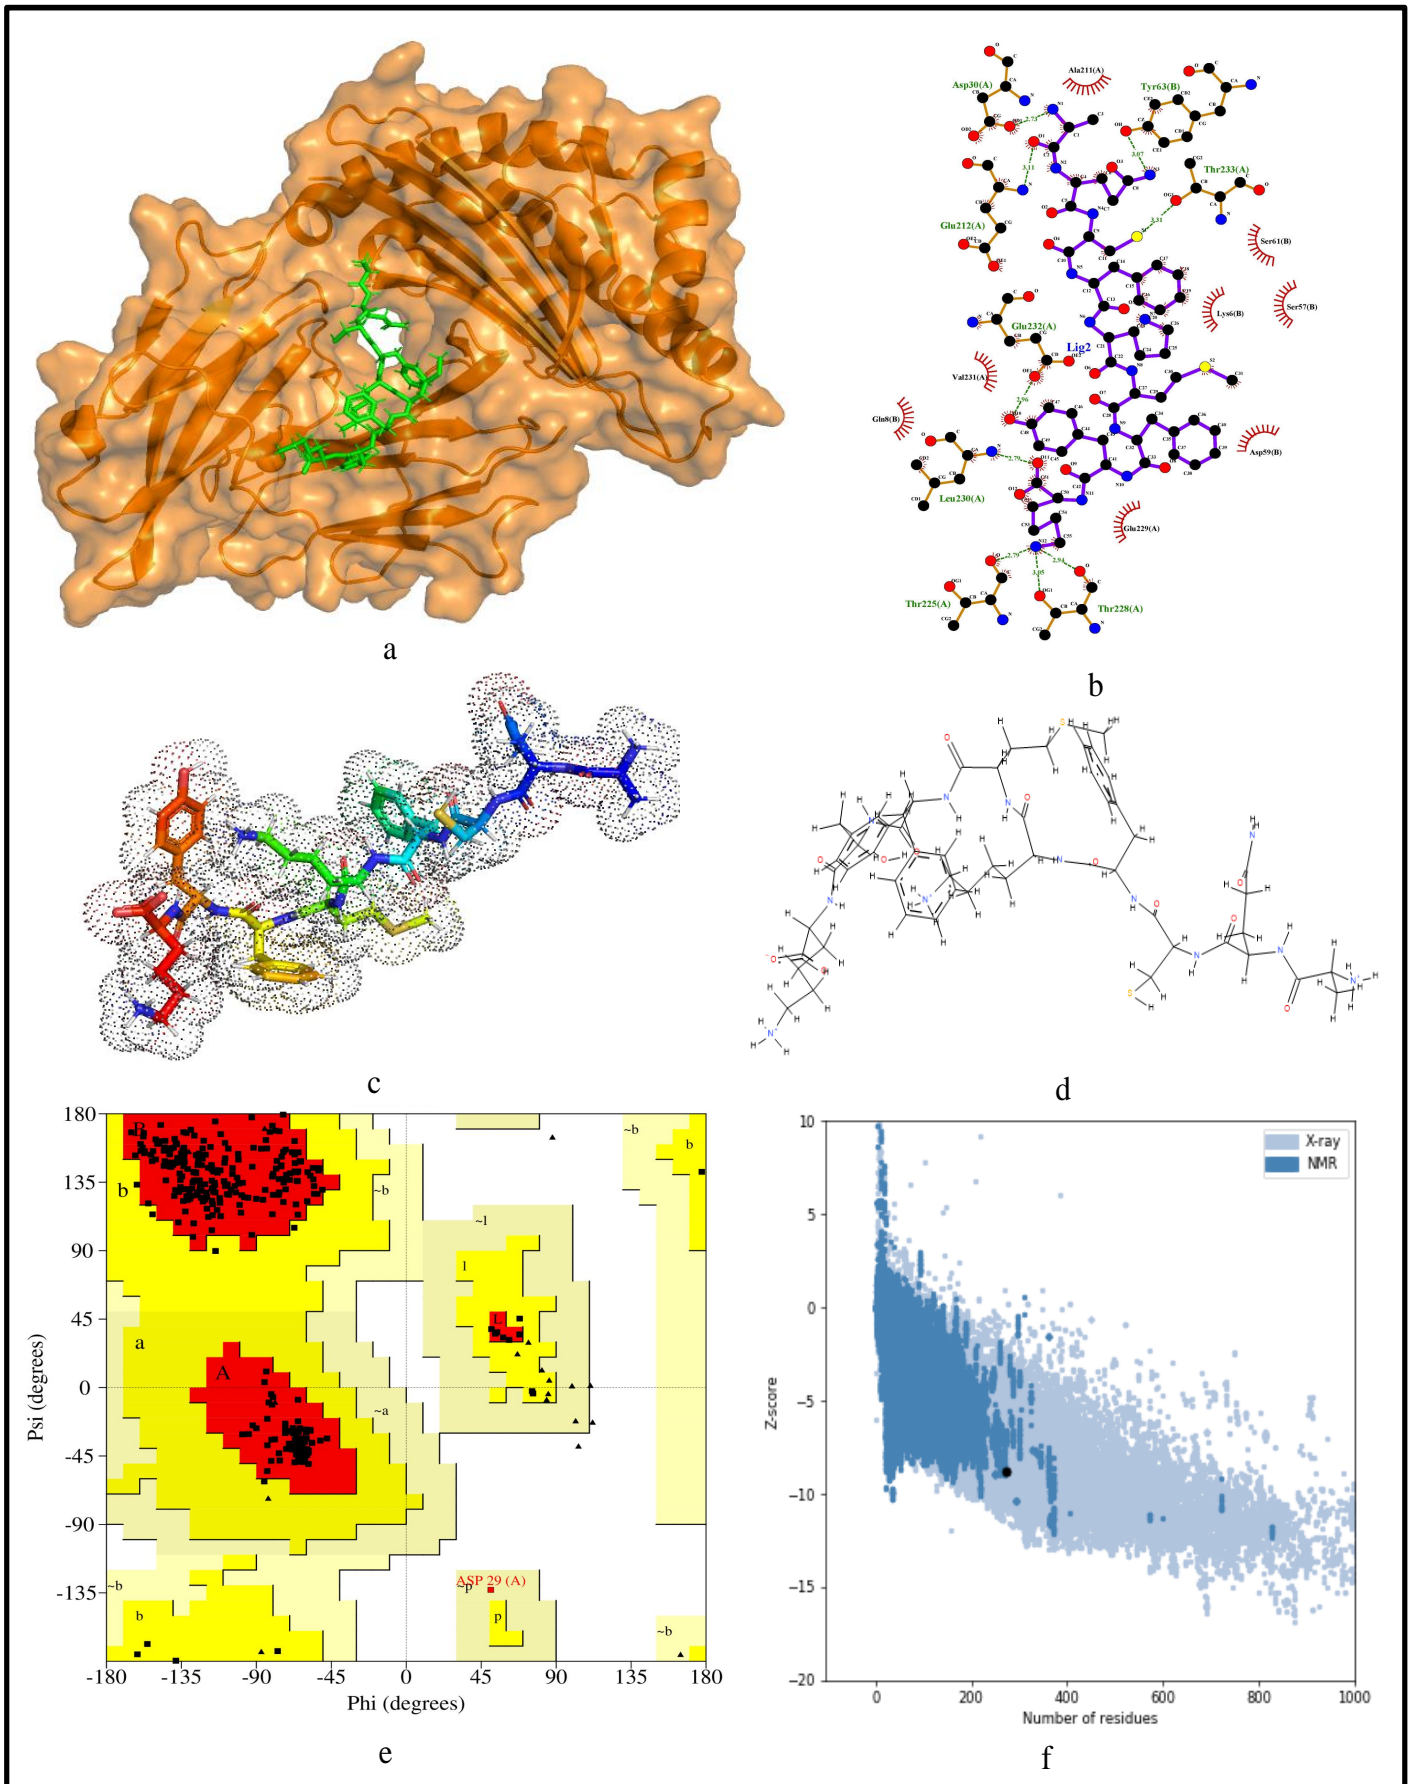

Figure S38: Structural analysis for MHC-II restricted T-cell epitope "AHKDKSAQCCKMFYK" (a) Docking structure of MHC-I restricted T-cell epitope (b) 2D pose representation between the epitope and HLA allele showing the different non-covalent bonds (c) 3D structure of the epitope (d) Chemical structure of the epitope (e) Ramachandran plot of the epitope allele structure showing lower energy sites of the residues in different frames and (f) Z-Score plot



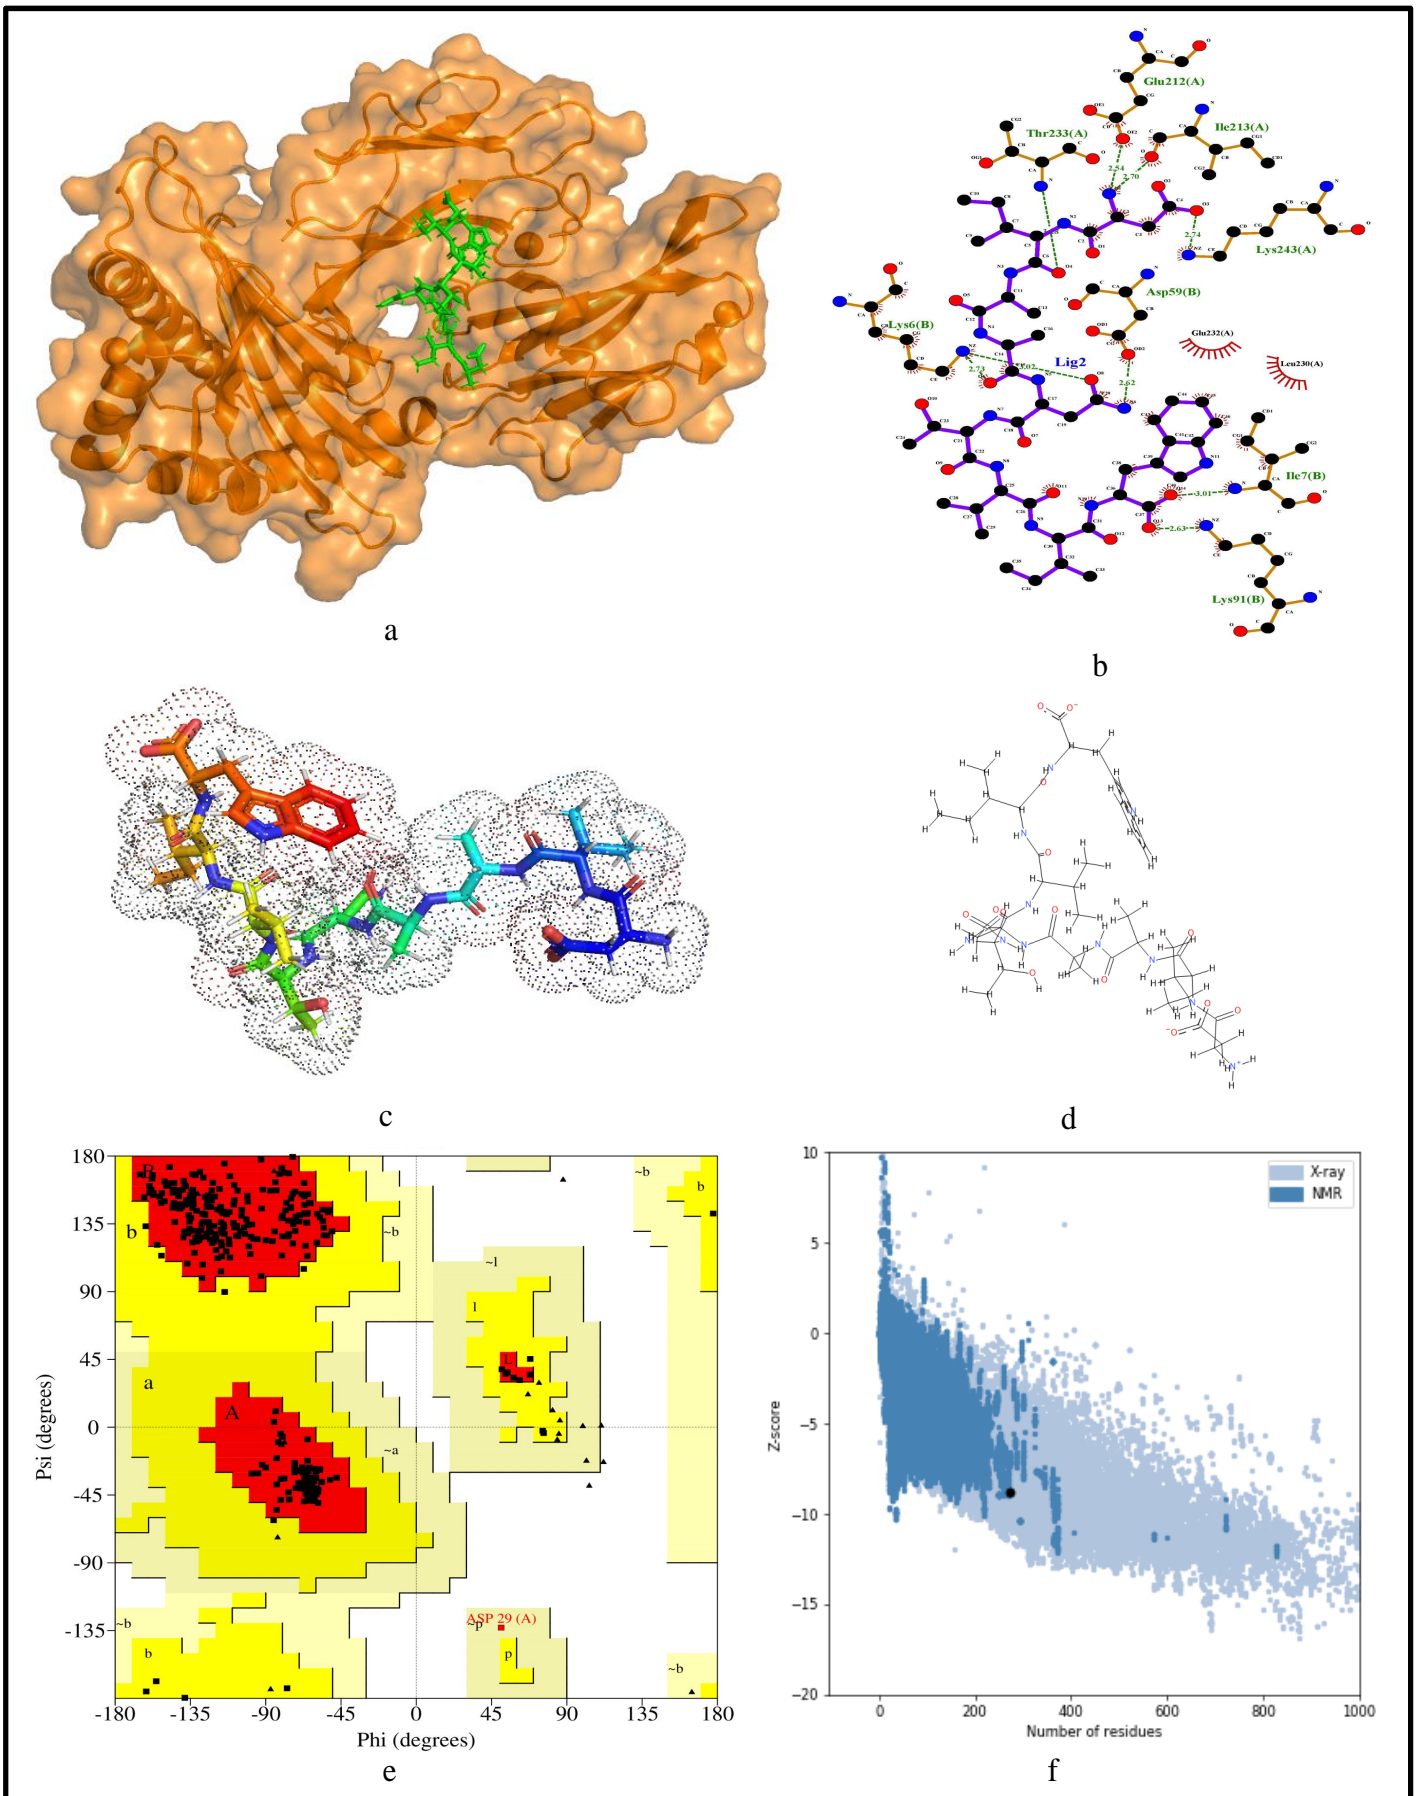

Figure S39: Structural analysis for MHC-II restricted T-cell epitope "WDYKRDAPAHISTIG" (a) Docking structure of MHC-I restricted T-cell epitope (b) 2D pose representation between the epitope and HLA allele showing the different non-covalent bonds (c) 3D structure of the epitope (d) Chemical structure of the epitope (e) Ramachandran plot of the epitope allele structure showing lower energy sites of the residues in different frames and (f) Z-Score plot

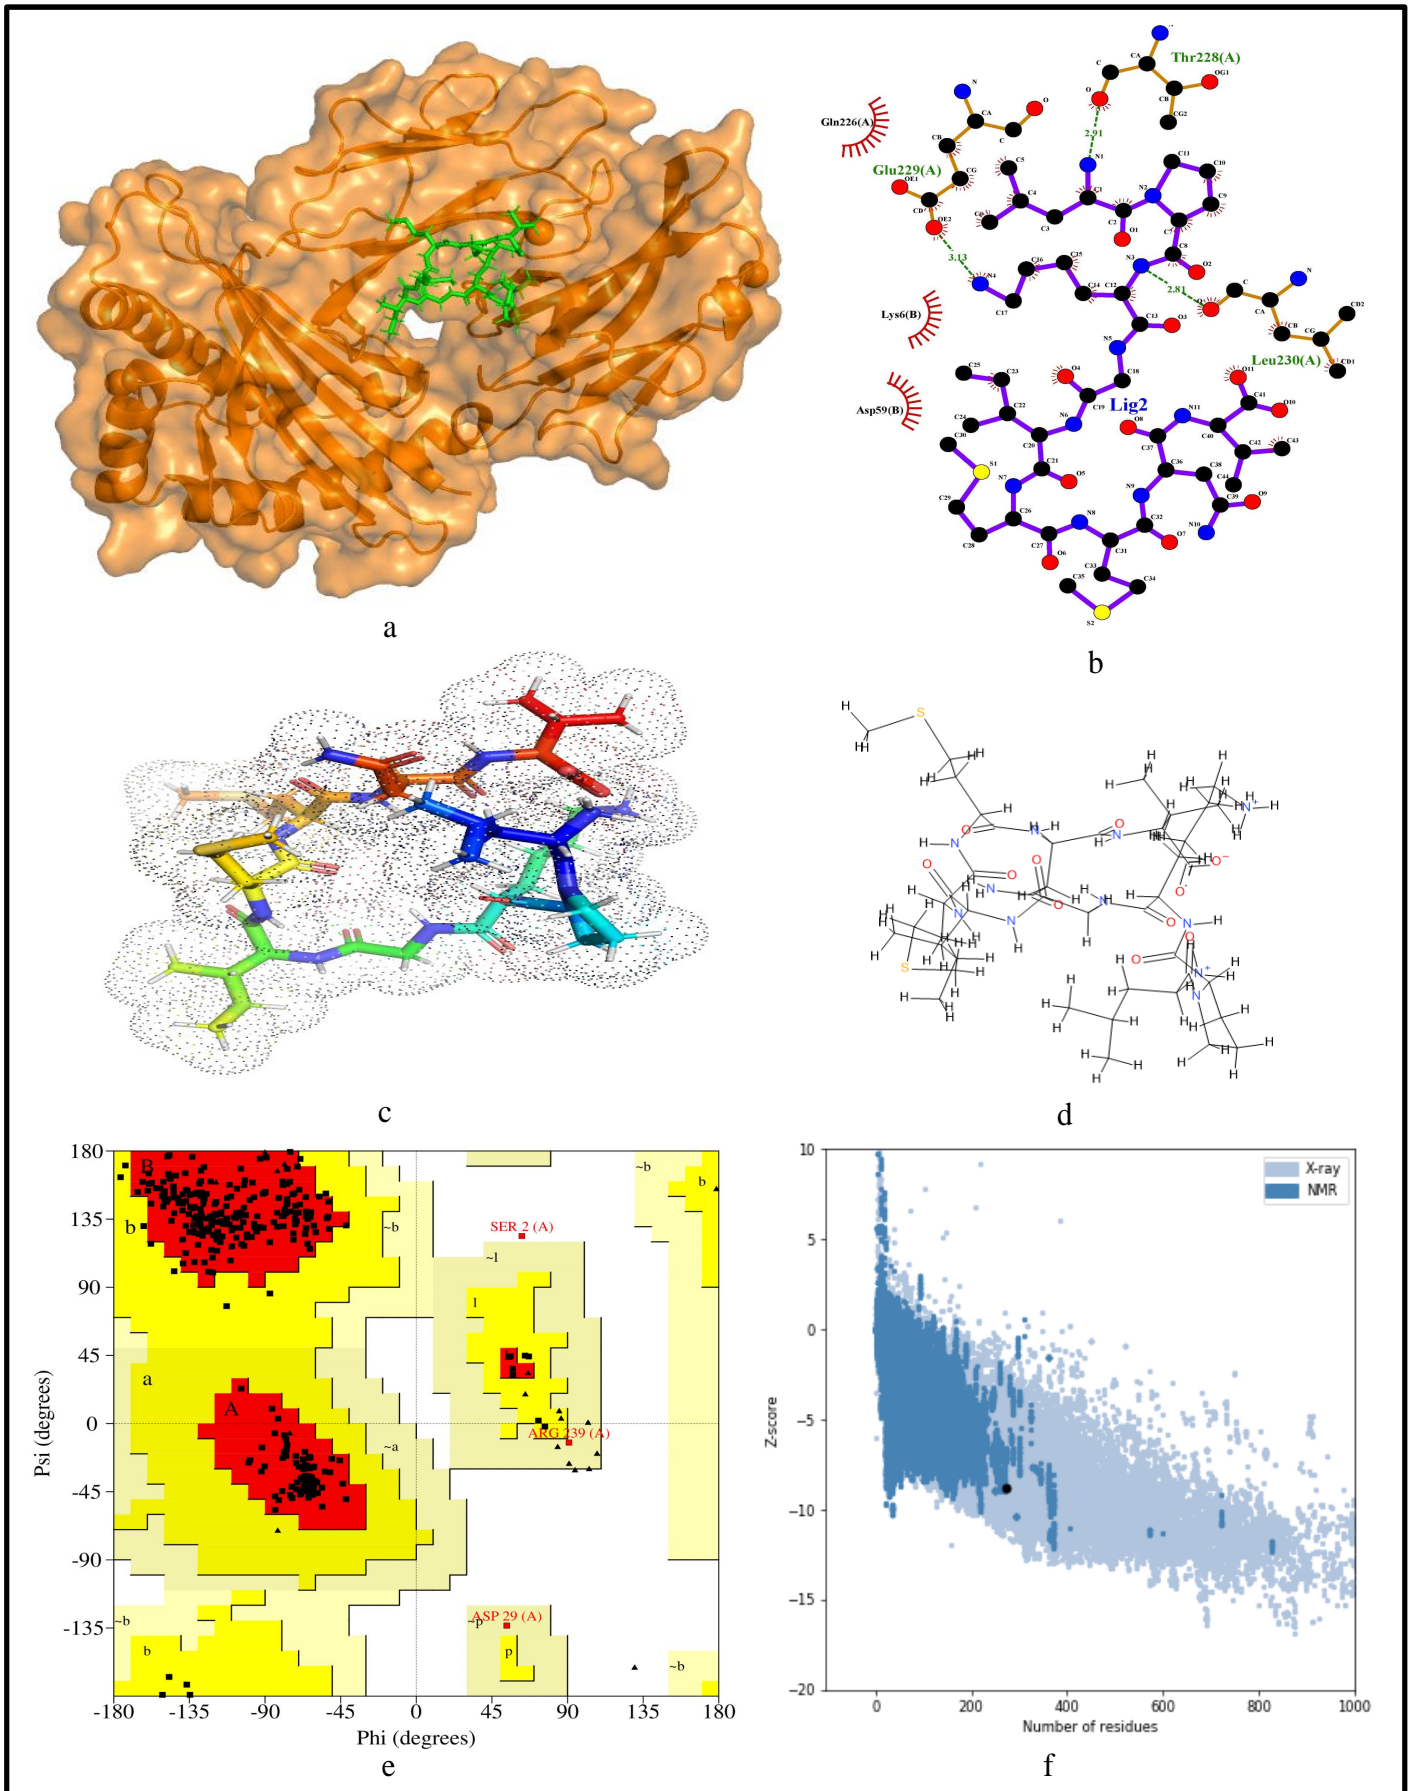

Figure S40: Structural analysis for MHC-II restricted T-cell epitope "PKGIMMNVAKYTQLC" (a) Docking structure of MHC-I restricted T-cell epitope (b) 2D pose representation between the epitope and HLA allele showing the different non-covalent bonds (c) 3D structure of the epitope (d) Chemical structure of the epitope (e) Ramachandran plot of the epitope allele structure showing lower energy sites of the residues in different frames and (f) Z-Score plot

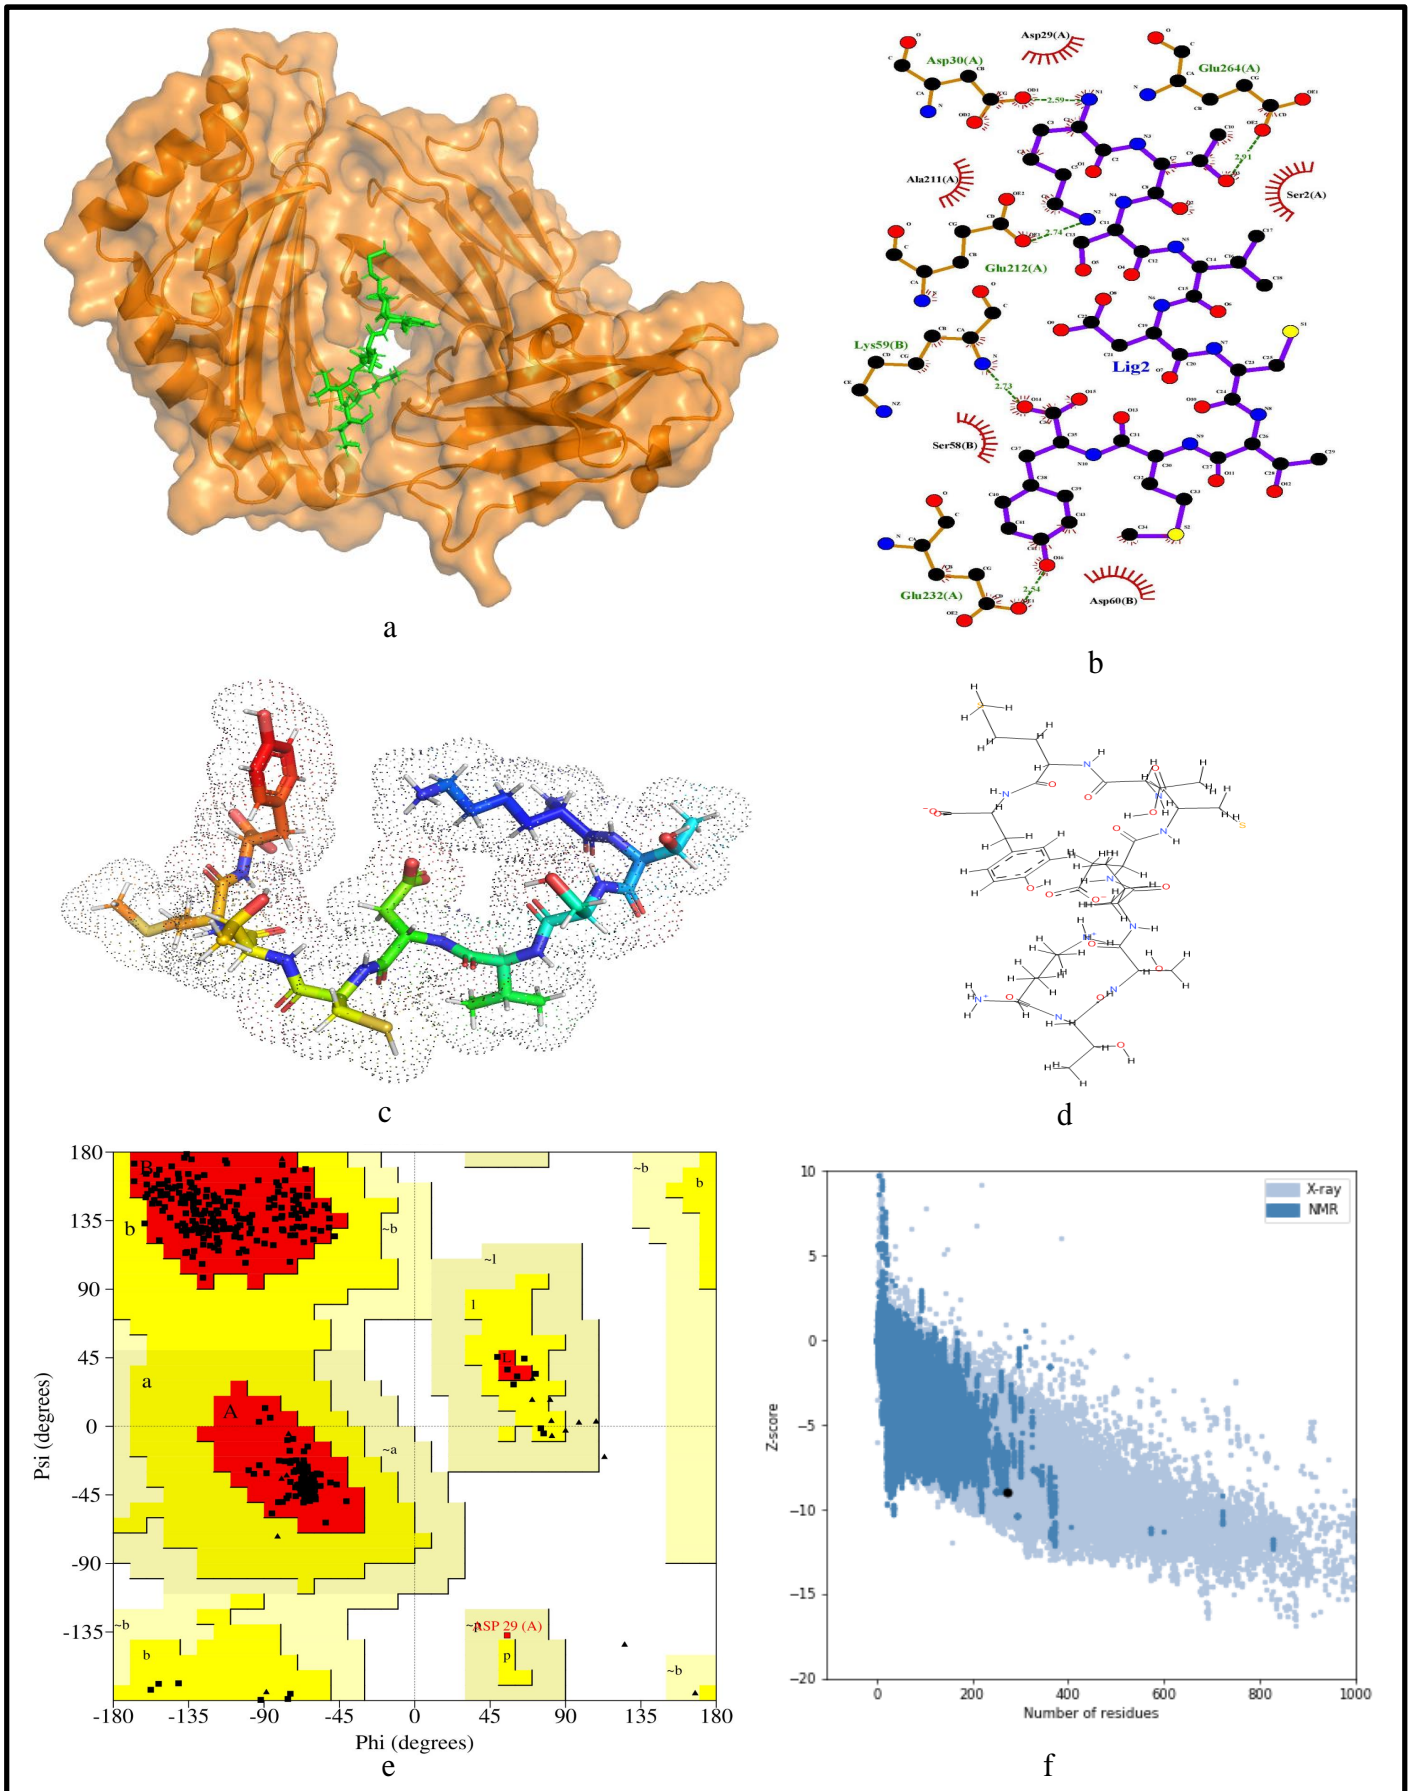

Figure S41: Structural analysis for MHC-II restricted T-cell epitope "PVSMTKTSVDCTMYI" (a) Docking structure of MHC-I restricted T-cell epitope (b) 2D pose representation between the epitope and HLA allele showing the different non-covalent bonds (c) 3D structure of the epitope (d) Chemical structure of the epitope (e) Ramachandran plot of the epitope allele structure showing lower energy sites of the residues in different frames and (f) Z-Score plot

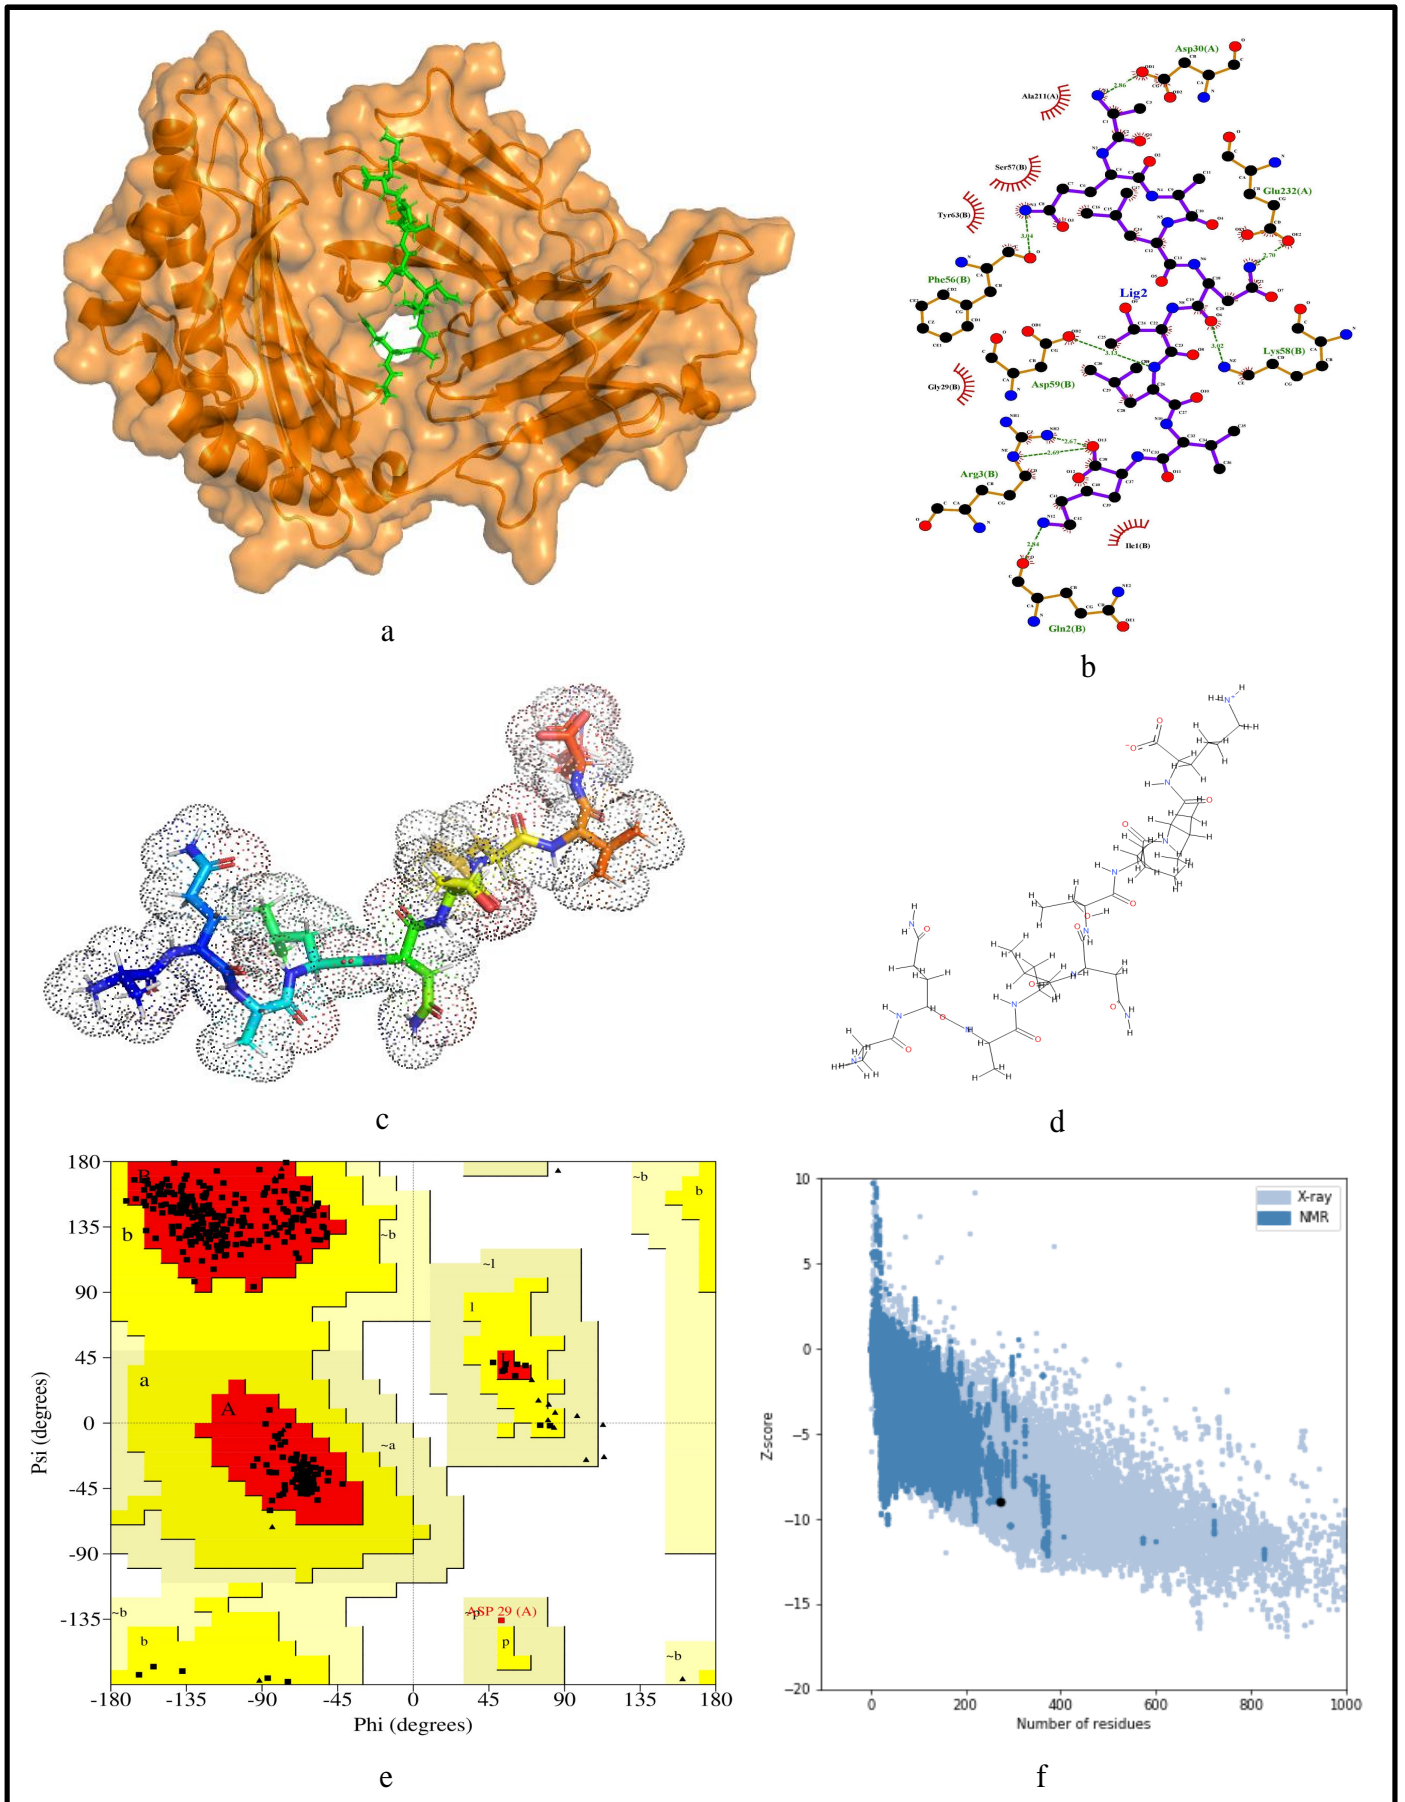

Figure S42: Structural analysis for MHC-II restricted T-cell epitope "QDVVNQNAQALNTLV" (a) Docking structure of MHC-I restricted T-cell epitope (b) 2D pose representation between the epitope and HLA allele showing the different non-covalent bonds (c) 3D structure of the epitope (d) Chemical structure of the epitope (e) Ramachandran plot of the epitope allele structure showing lower energy sites of the residues in different frames and (f) Z-Score plot

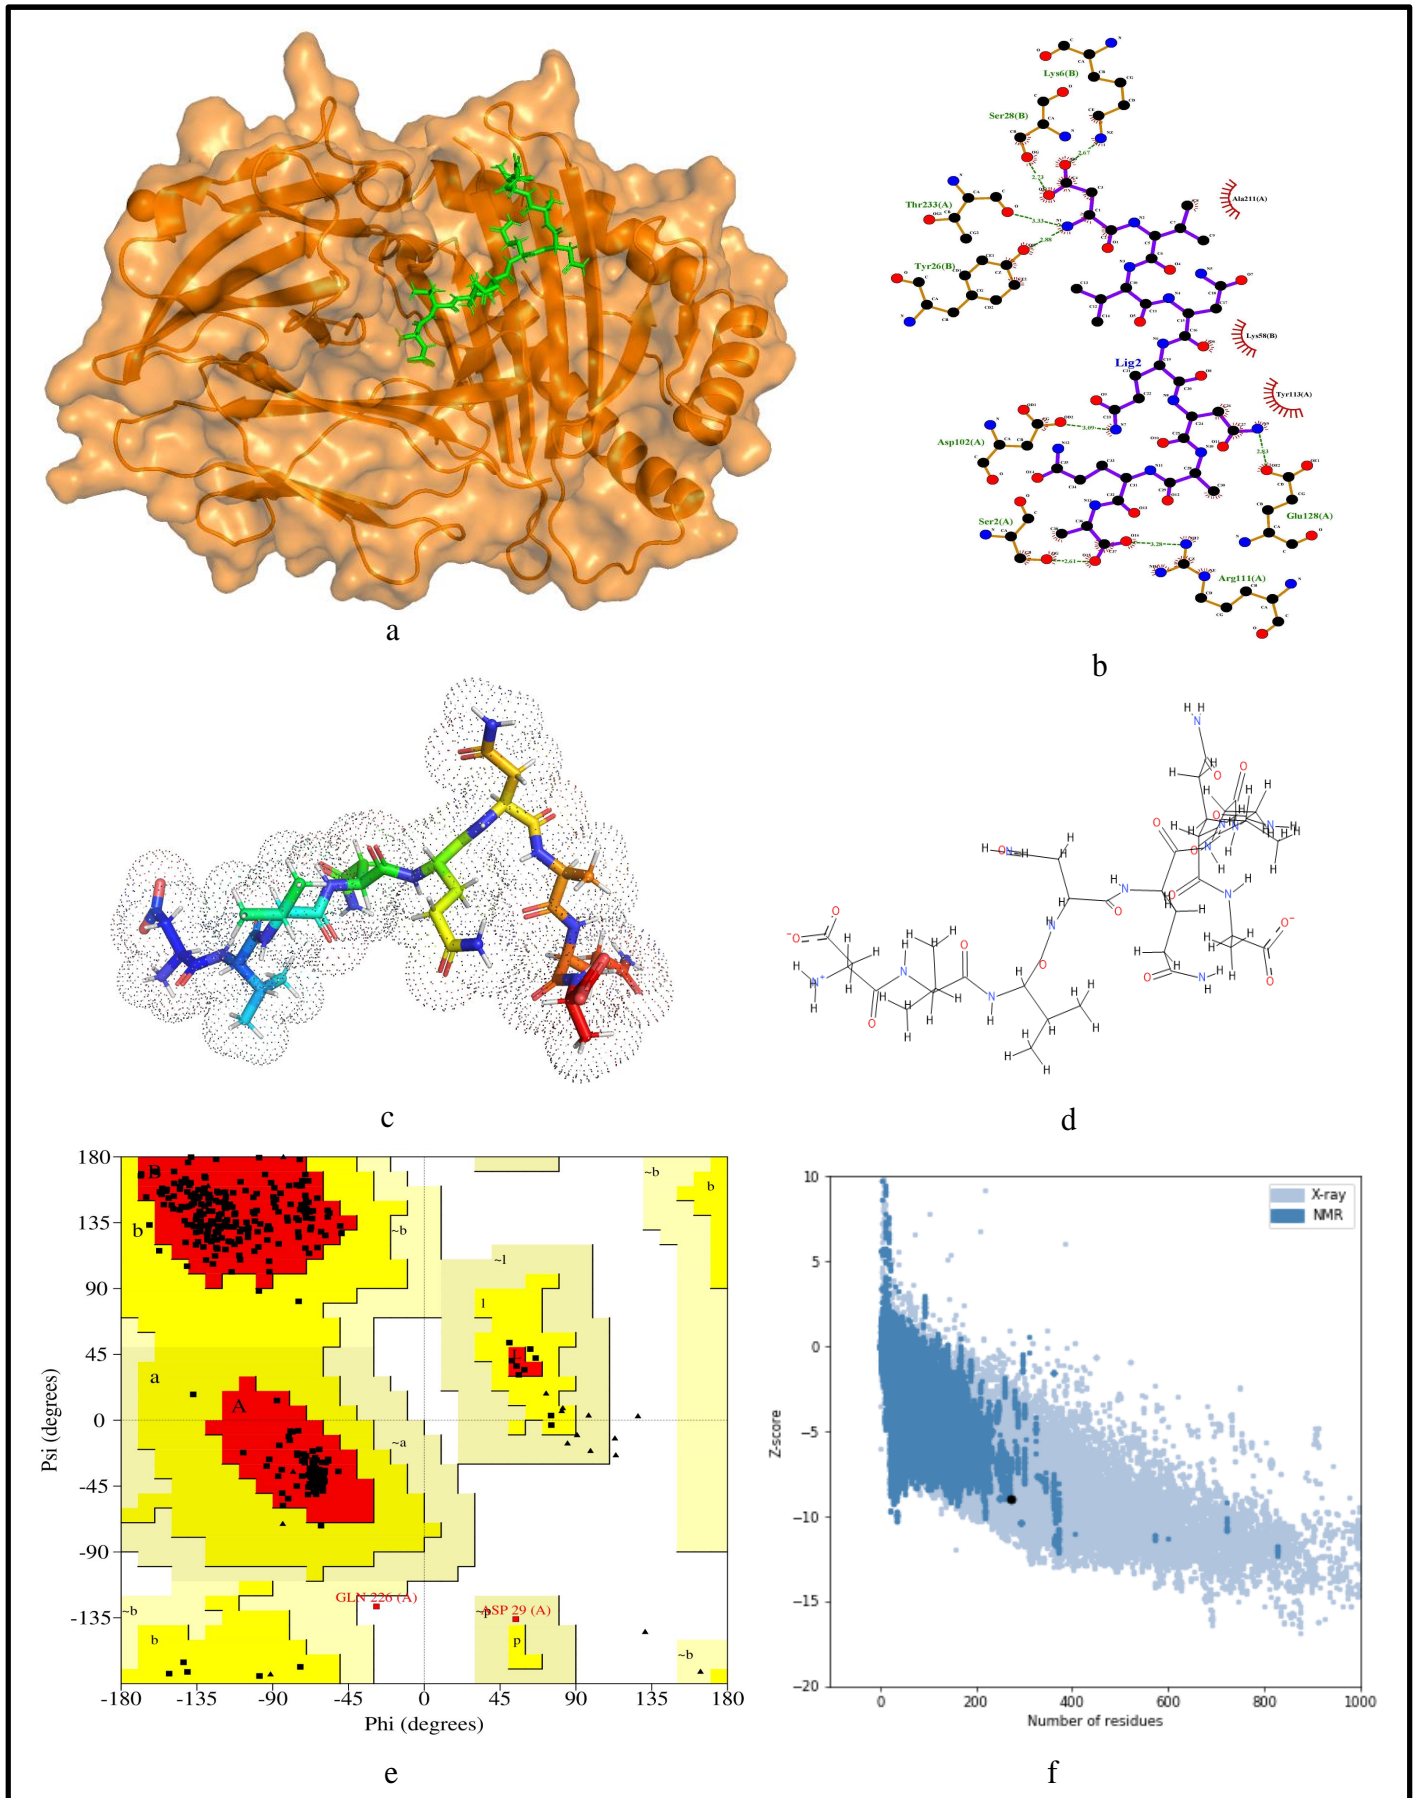

Figure S43: Structural analysis for MHC-II restricted T-cell epitope "DVVNQNAQALNTLVK" (a) Docking structure of MHC-I restricted T-cell epitope (b) 2D pose representation between the epitope and HLA allele showing the different non-covalent bonds (c) 3D structure of the epitope (d) Chemical structure of the epitope (e) Ramachandran plot of the epitope allele structure showing lower energy sites of the residues in different frames and (f) Z-Score plot

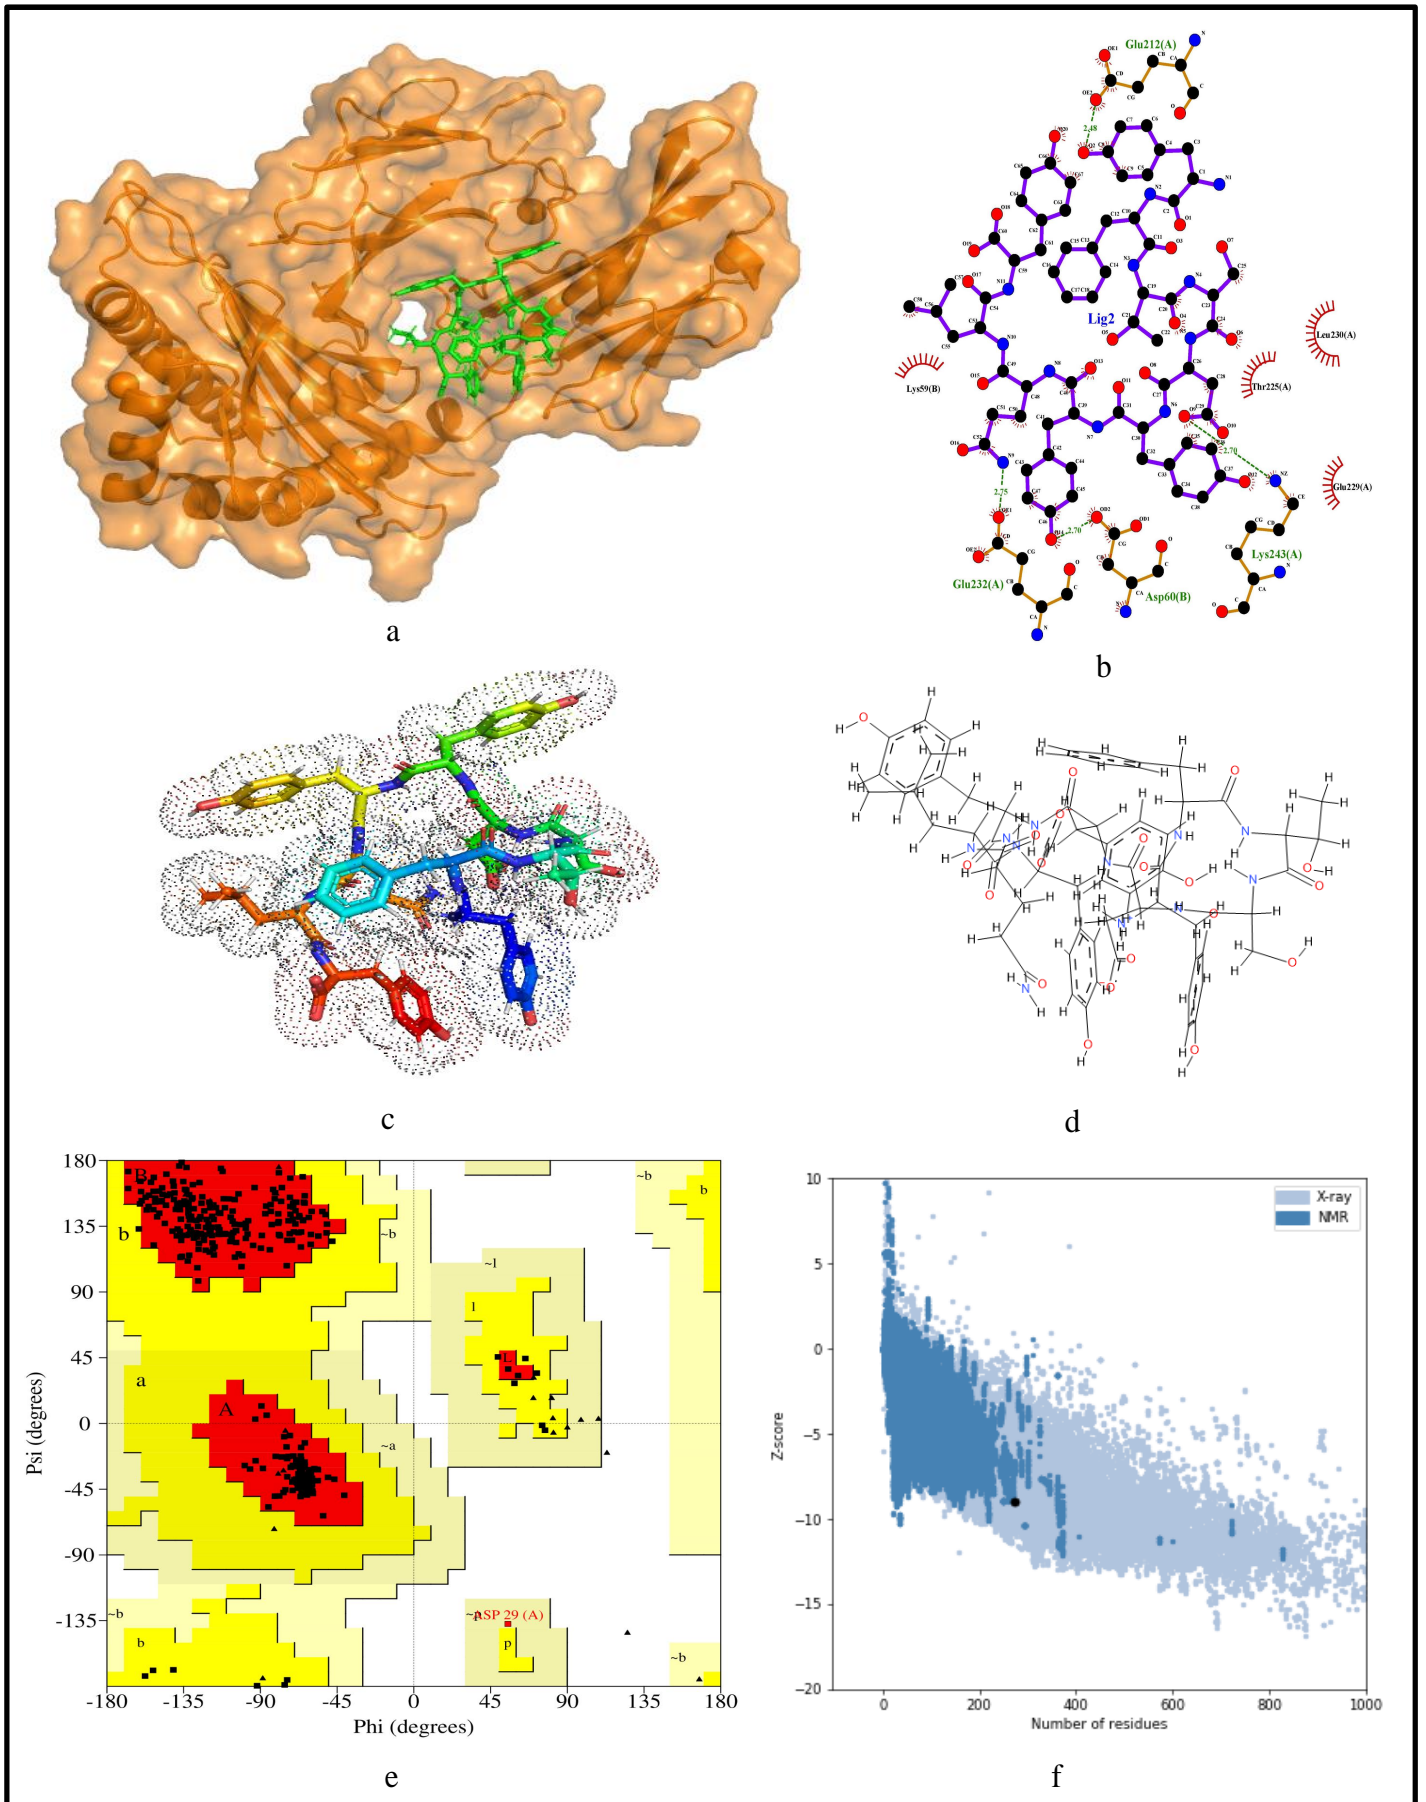

Figure S44: Structural analysis for MHC-II restricted T-cell epitope "HSYFTSDYYQLYSTQ" (a) Docking structure of MHC-I restricted T-cell epitope (b) 2D pose representation between the epitope and HLA allele showing the different non-covalent bonds (c) 3D structure of the epitope (d) Chemical structure of the epitope (e) Ramachandran plot of the epitope allele structure showing lower energy sites of the residues in different frames and (f) Z-Score plot

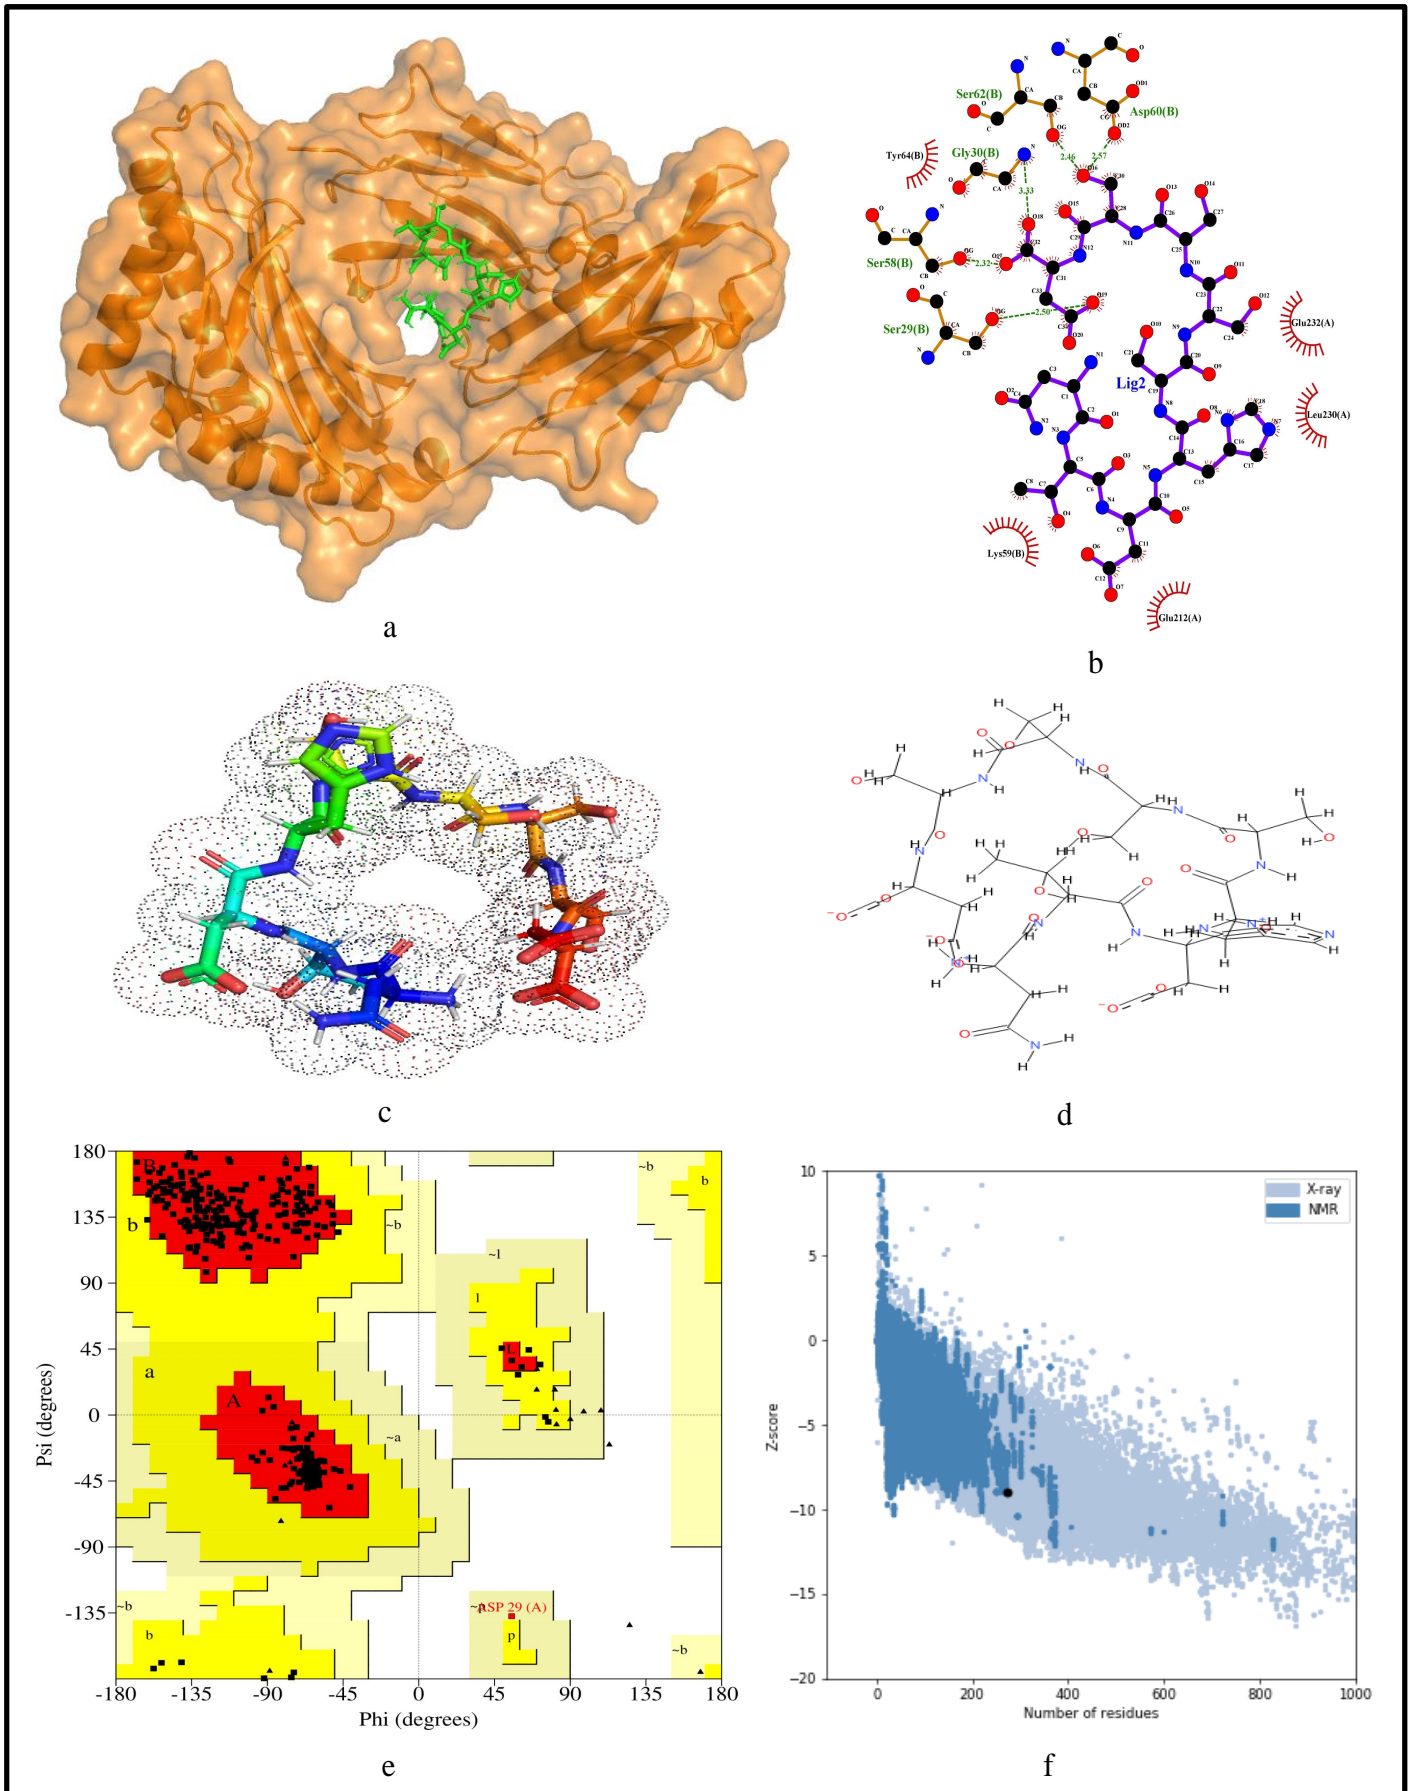

Figure S45: Structural analysis for MHC-II restricted T-cell epitope "NYKLNTDHSSSDNI" (a) Docking structure of MHC-I restricted T-cell epitope (b) 2D pose representation between the epitope and HLA allele showing the different non-covalent bonds (c) 3D structure of the epitope (d) Chemical structure of the epitope (e) Ramachandran plot of the epitope allele structure showing lower energy sites of the residues in different frames and (f) Z-Score plot

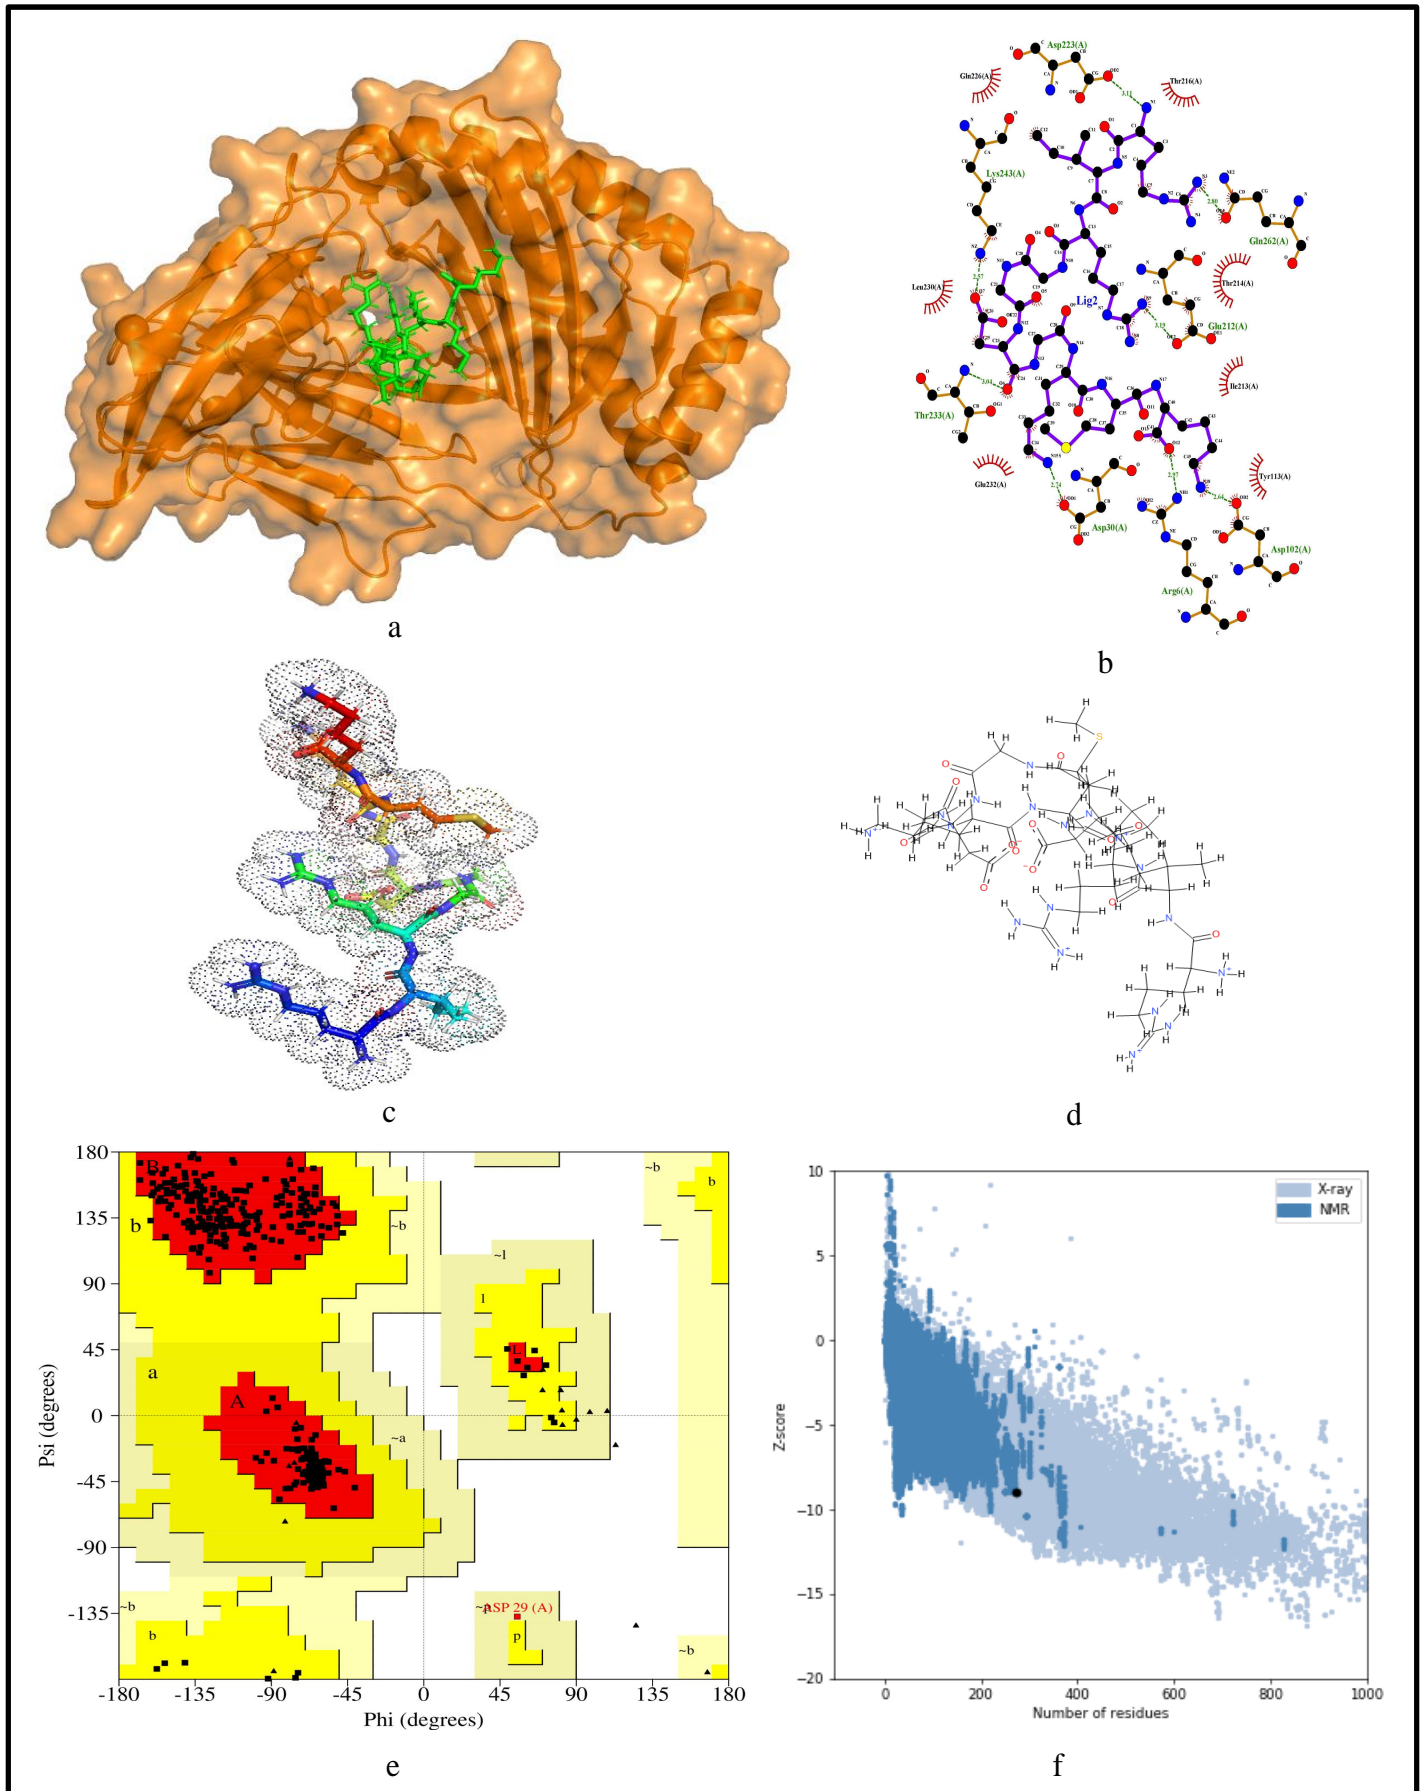

Figure S46: Structural analysis for MHC-II restricted T-cell epitope "IGYYRRATRRIRGGD" (a) Docking structure of MHC-I restricted T-cell epitope (b) 2D pose representation between the epitope and HLA allele showing the different non-covalent bonds (c) 3D structure of the epitope (d) Chemical structure of the epitope (e) Ramachandran plot of the epitope allele structure showing lower energy sites of the residues in different frames and (f) Z-Score plot



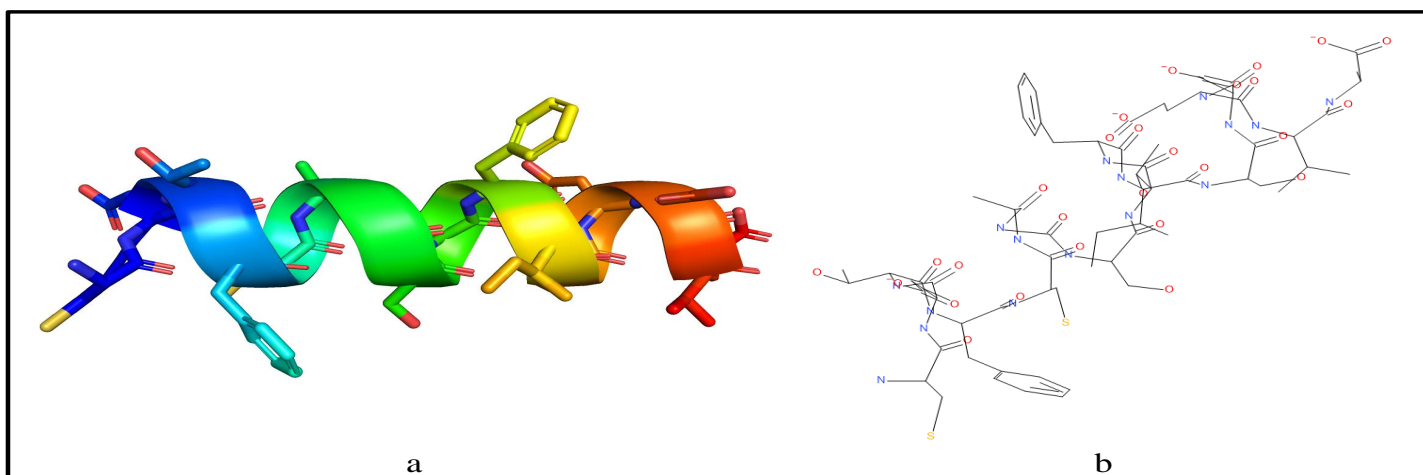

Figure S47: Structural representations for B-cell epitope "CDTFCAGSTFISDEVA" (a) 3D structure of the epitope (b) Chemical structure of the epitope

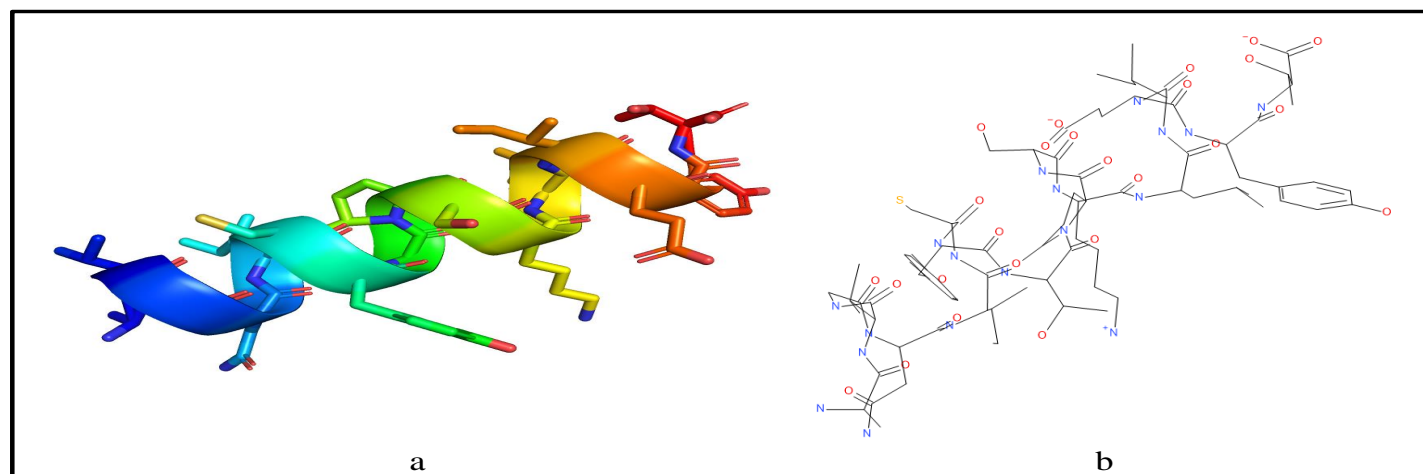

Figure S48: Structural representations for B-cell epitope "AVGNICYTPSKLIEYT" (a) 3D structure of the epitope (b) Chemical structure of the epitope

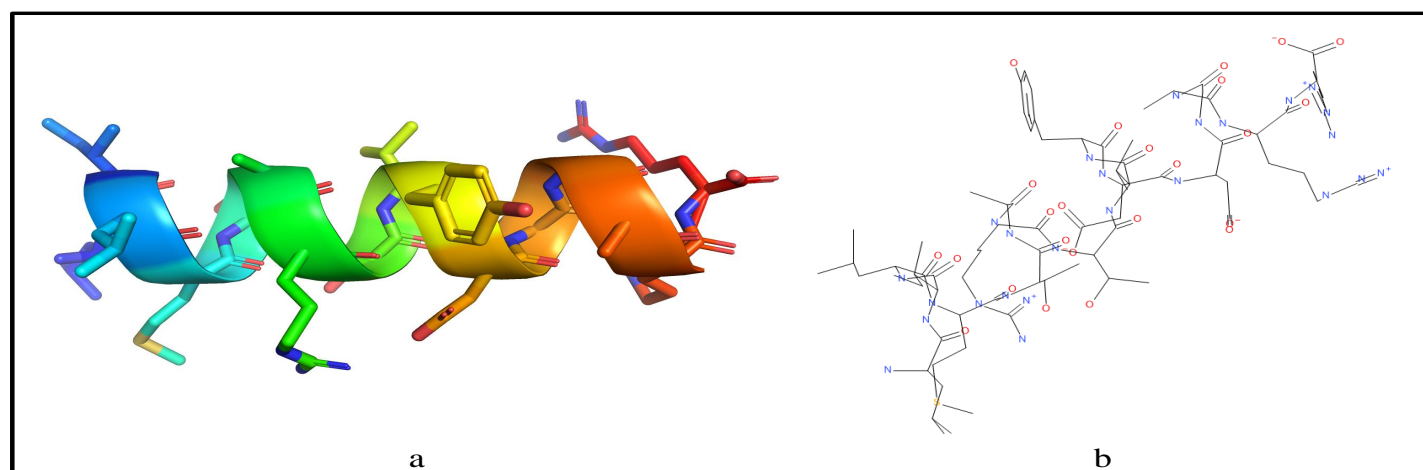

Figure S49: Structural representation for B-cell epitope "LILMTARTVYDDGARR" (a) 3D structure of the epitope (b) Chemical structure of the epitope

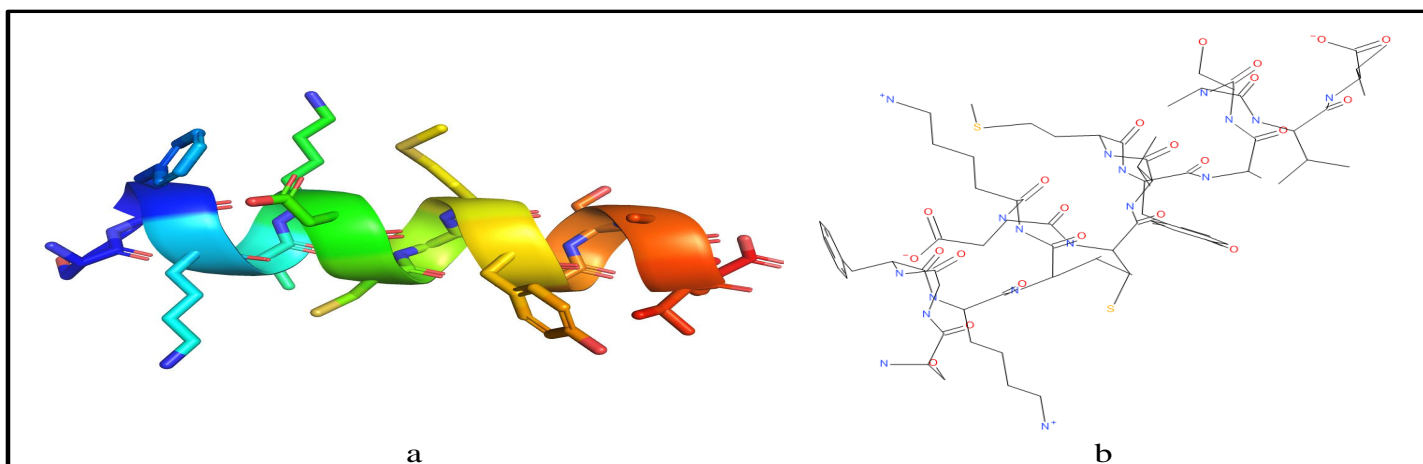

Figure S50: Structural representation for B-cell epitope "SGFKLKDCVMYASAVV" (a) 3D structure of the epitope (b) Chemical structure of the epitope

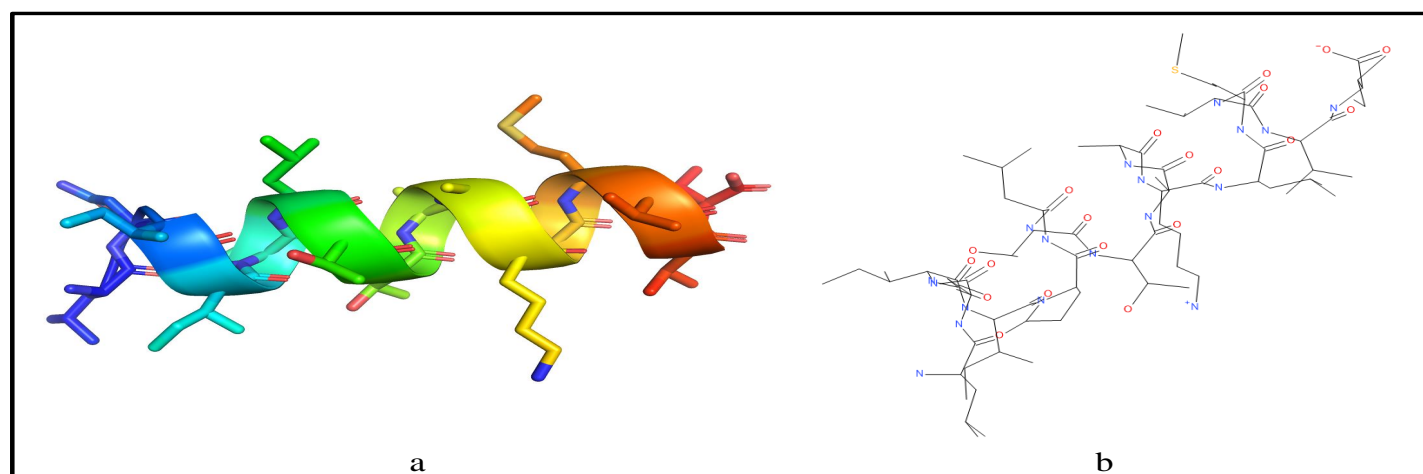

Figure S51: Structural representation for B-cell epitope "LNIPLTTAAKLMVVI" (a) 3D structure of the epitope (b) Chemical structure of the epitope

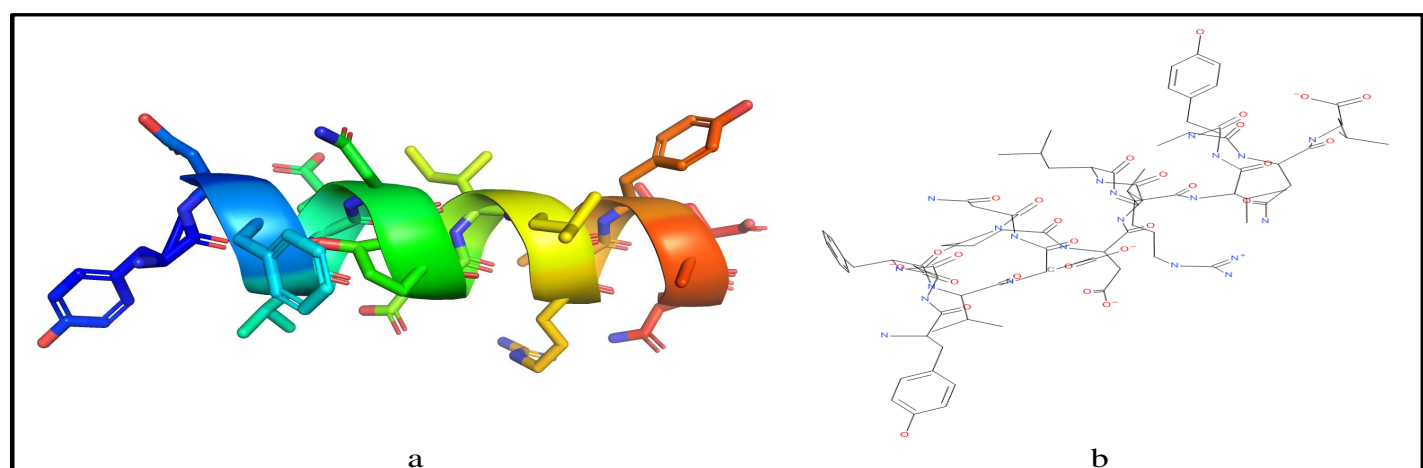

Figure S52: Structural representation for B-cell epitope "YDFVENPDILRVYANL" (a) 3D structure of the epitope (b) Chemical structure of the epitope

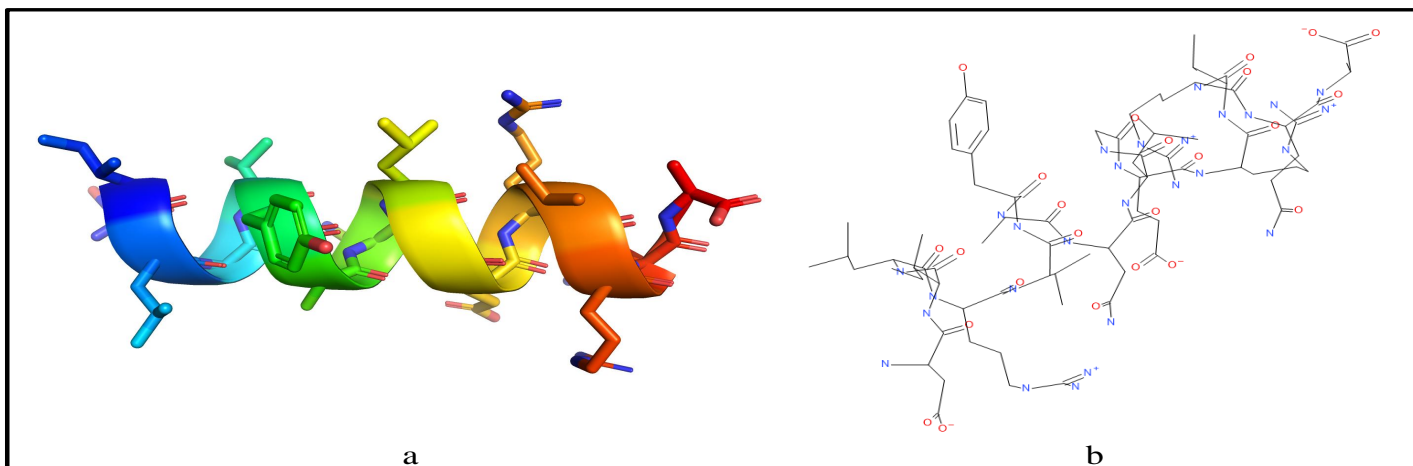

Figure S53: Structural representation for B-cell epitope "DILRVYANLGERVRQA" (a) 3D structure of the epitope (b) Chemical structure of the epitope

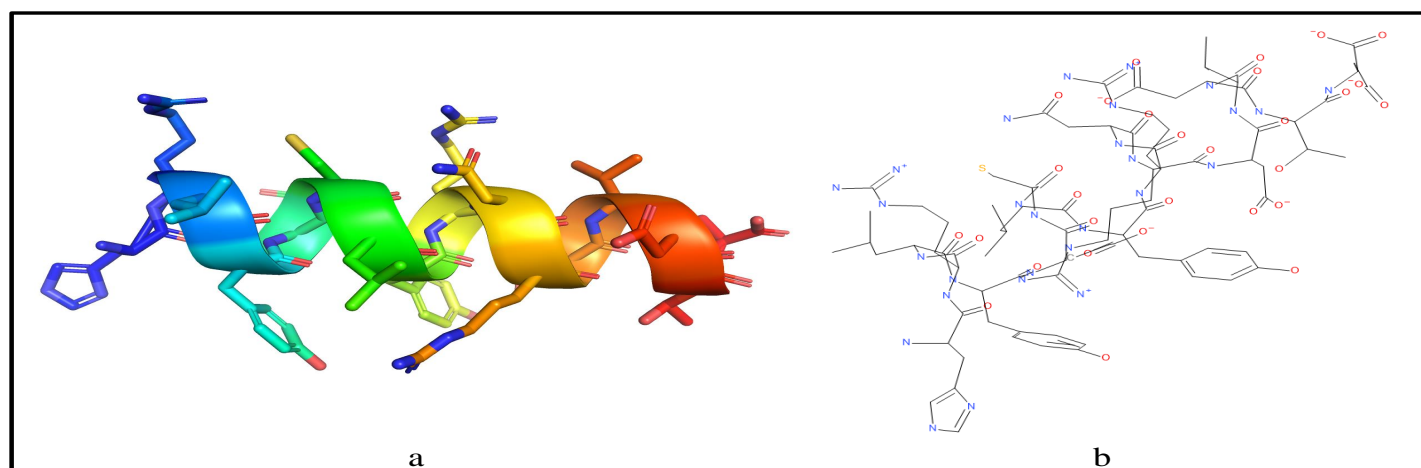

Figure S54: Structural representation for B-cell epitope "HRLYECLYRNRDVRTD" (a) 3D structure of the epitope (b) Chemical structure of the epitope

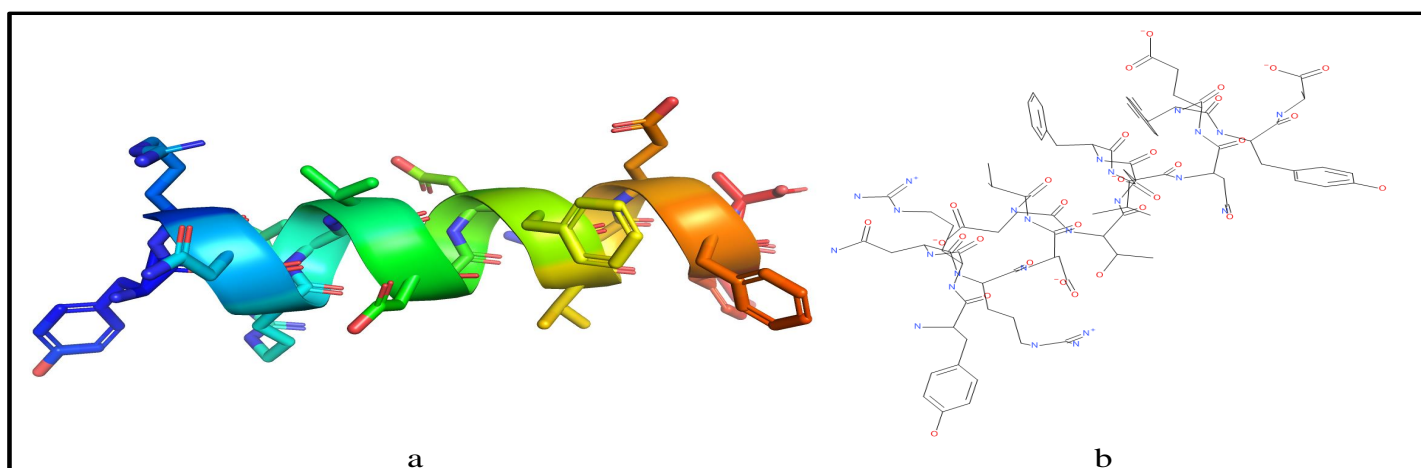

Figure S55: Structural representation for B-cell epitope "YRNRDVTDFVNEFYA" (a) 3D structure of the epitope (b) Chemical structure of the epitope

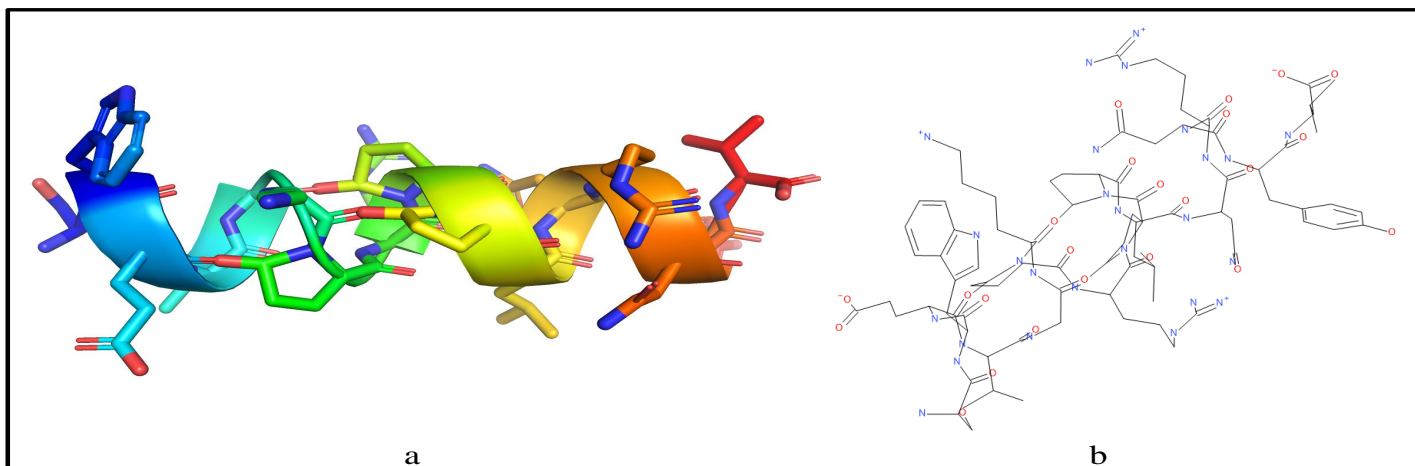

Figure S56: Structural representation for B-cell epitope "SWEVGKPRPPLNRNYV" (a) 3D structure of the epitope (b) Chemical structure of the epitope

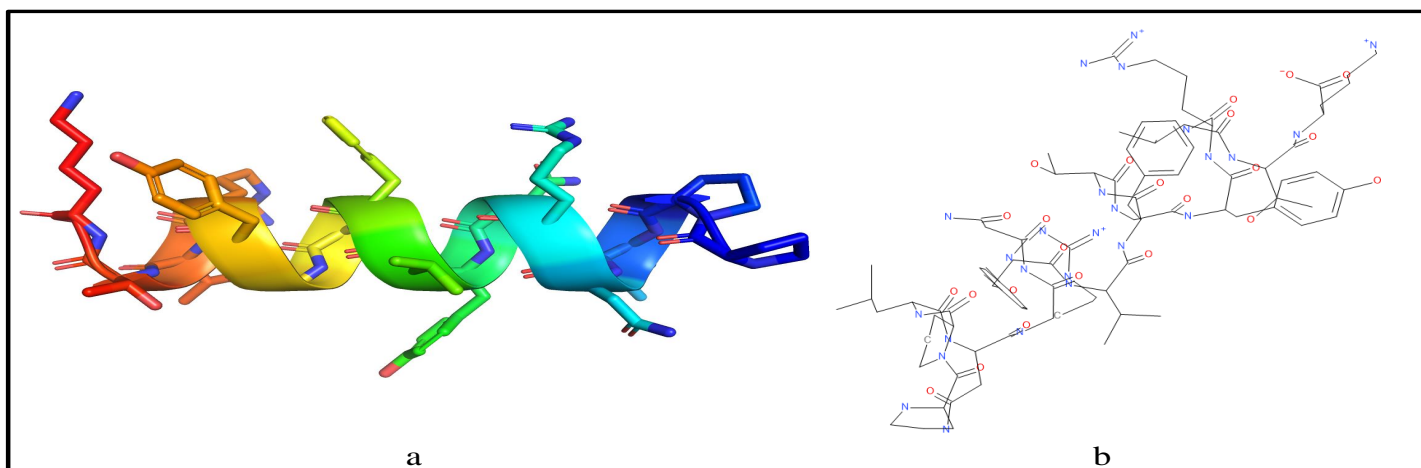

Figure S57: Structural representation for B-cell epitope "PPLNRNYVFTGYRVTK" (a) 3D structure of the epitope (b) Chemical structure of the epitope

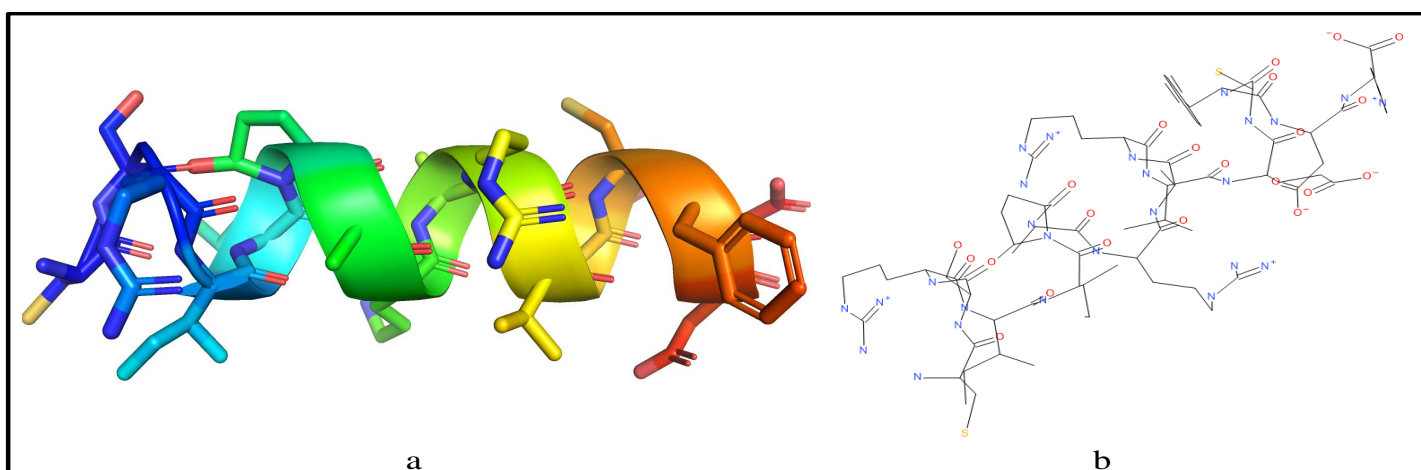

Figure S58: Structural representation for B-cell epitope "CSRIIPARARVECFDK" (a) 3D structure of the epitope (b) Chemical structure of the epitope

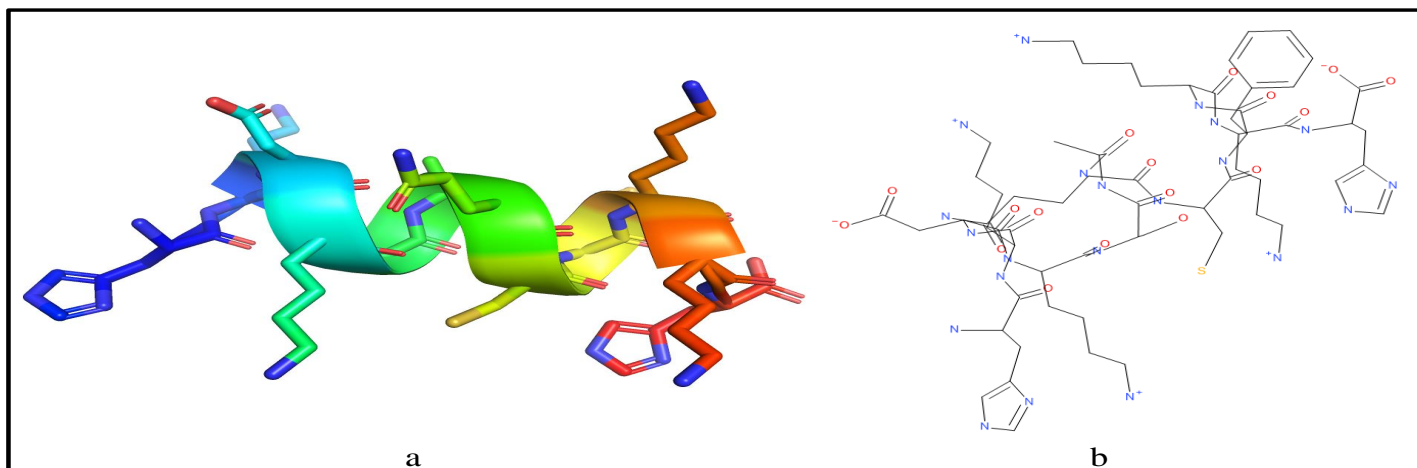

Figure S59: Structural representation for B-cell epitope "HKDKSAQCFK" (a) 3D structure of the epitope (b) Chemical structure of the epitope

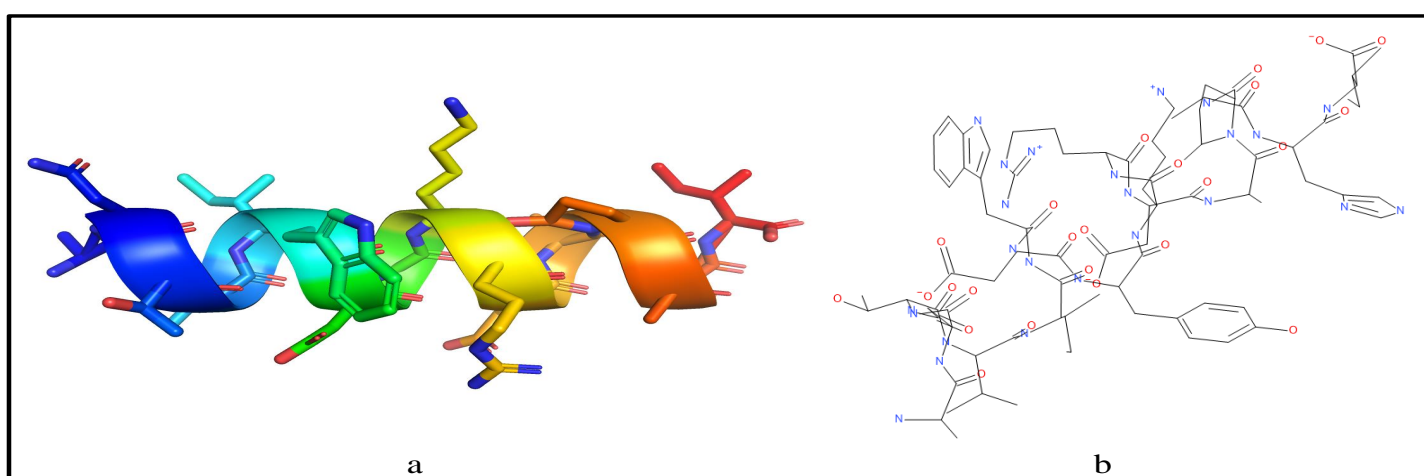

Figure S60: Structural representation for B-cell epitope "ANTVIWDYKRDAPAHI" (a) 3D structure of the epitope (b) Chemical structure of the epitope

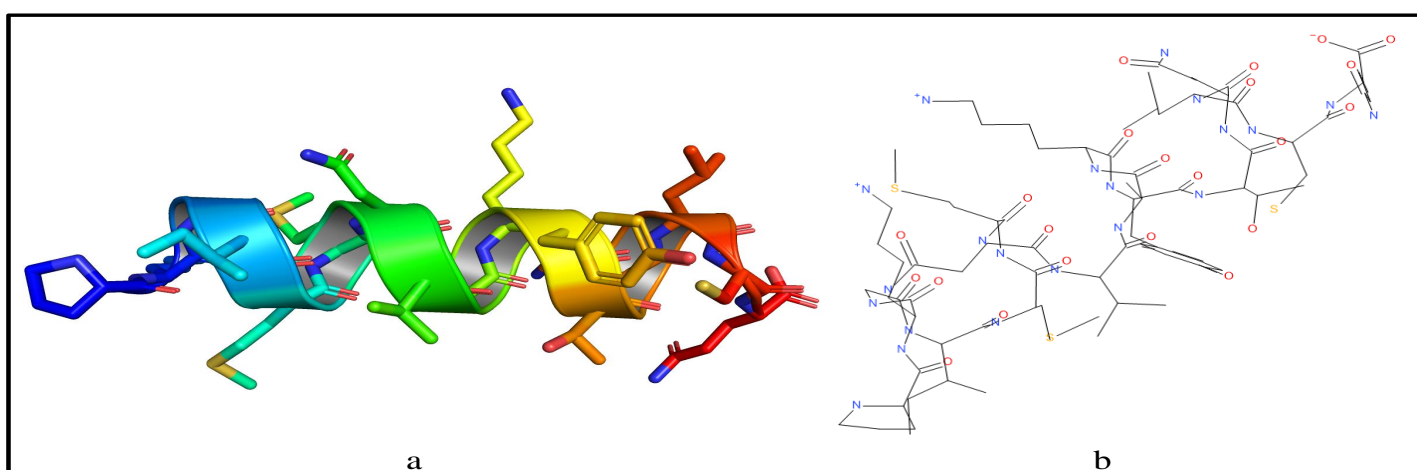

Figure S61: Structural representation for B-cell epitope "PKGIMMNVAKYTQLCQ" (a) 3D structure of the epitope (b) Chemical structure of the epitope

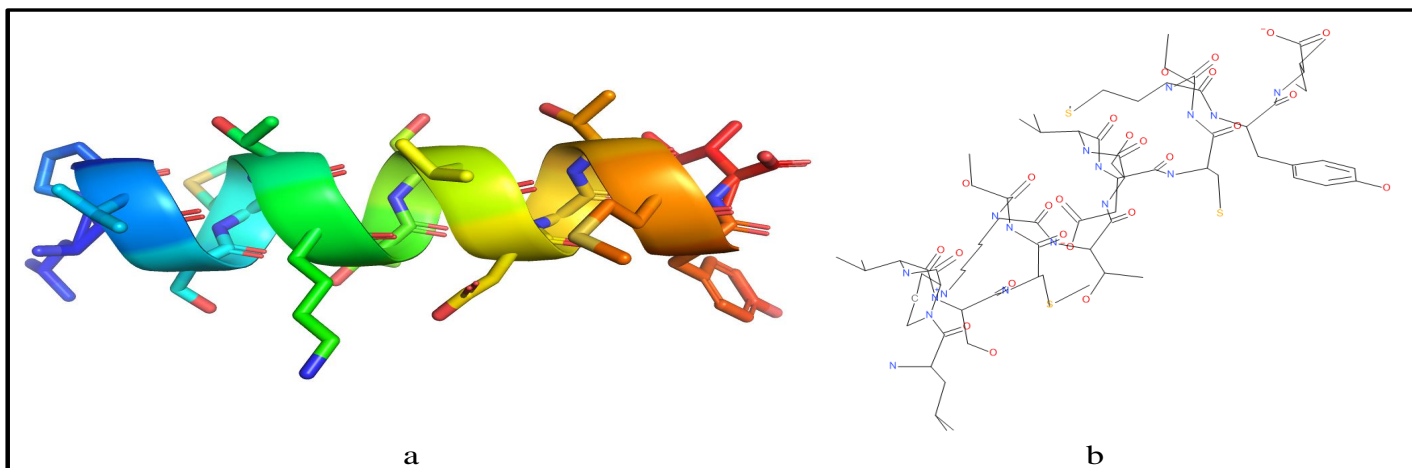

Figure S62: Structural representation for B-cell epitope "LPVSMTKTSVDCTMYI" (a) 3D structure of the epitope (b) Chemical structure of the epitope

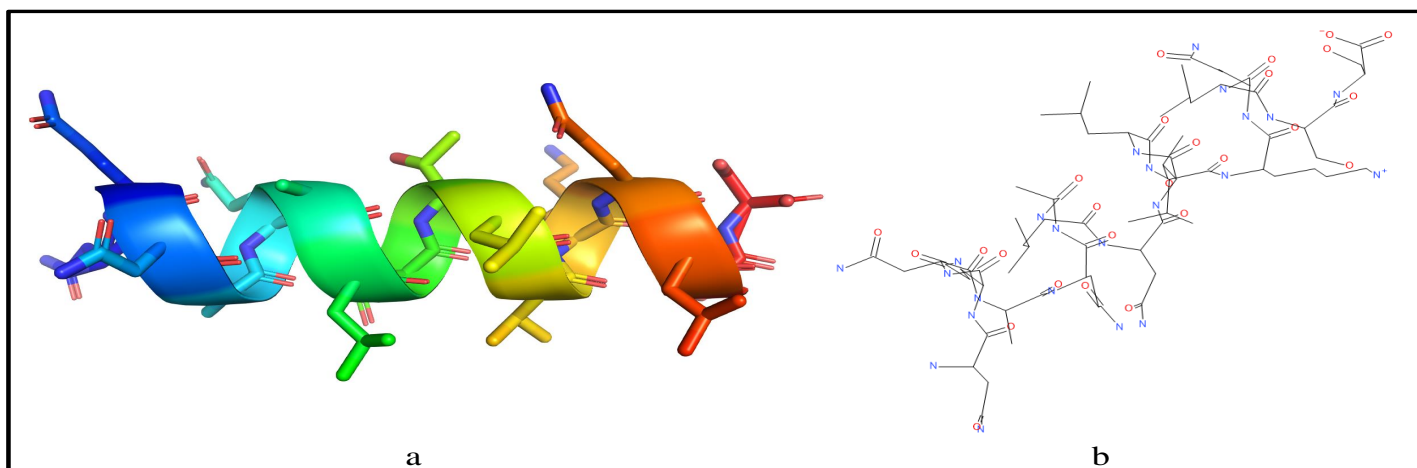

Figure S63: Structural representation for B-cell epitope "NQNAQALNTLVKQLSS" (a) 3D structure of the epitope (b) Chemical structure of the epitope

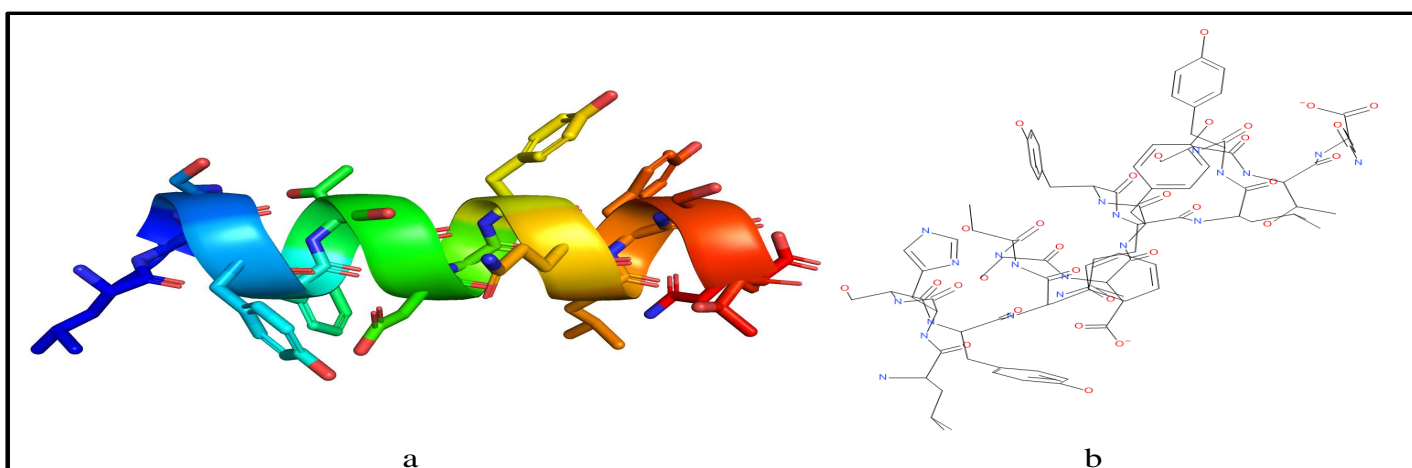

Figure S64: Structural representation for B-cell epitope "LHSYFTSDYYQLYSTQ" (a) 3D structure of the epitope (b) Chemical structure of the epitope

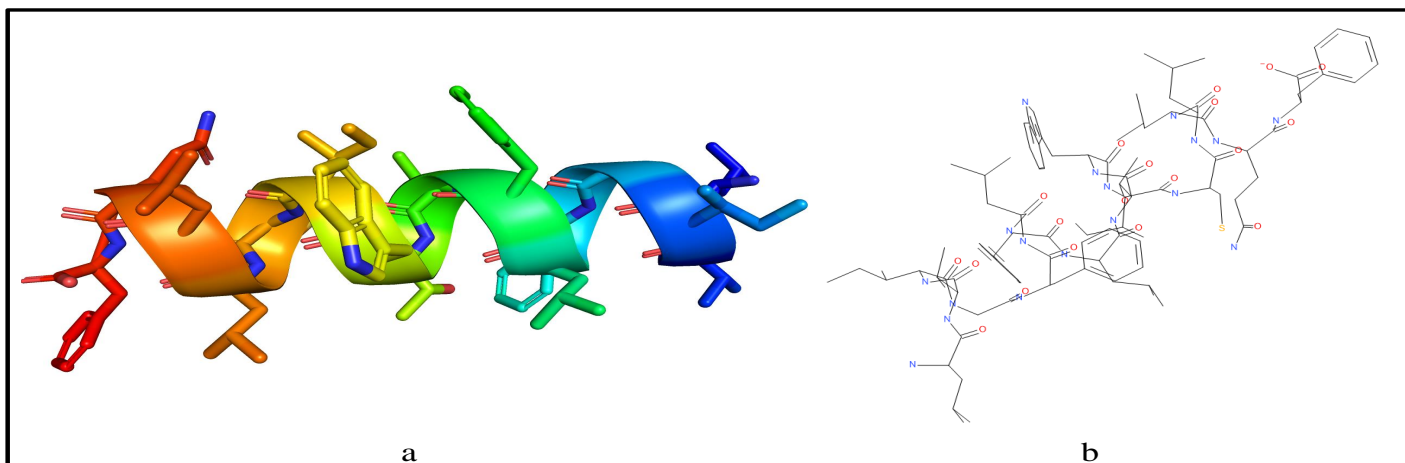

Figure S65: Structural representation for B-cell epitope "LVIGFLFTWICLLQF" (a) 3D structure of the epitope (b) Chemical structure of the epitope

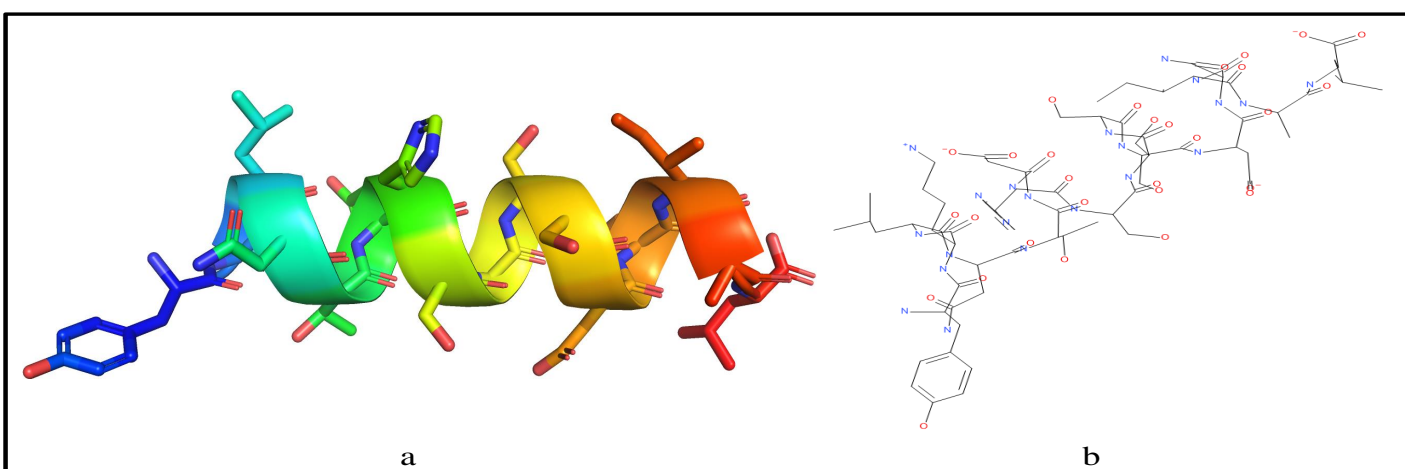

Figure S66: Structural representation for B-cell epitope "YKLNTHSSSDNIAL" (a) 3D structure of the epitope (b) Chemical structure of the epitope

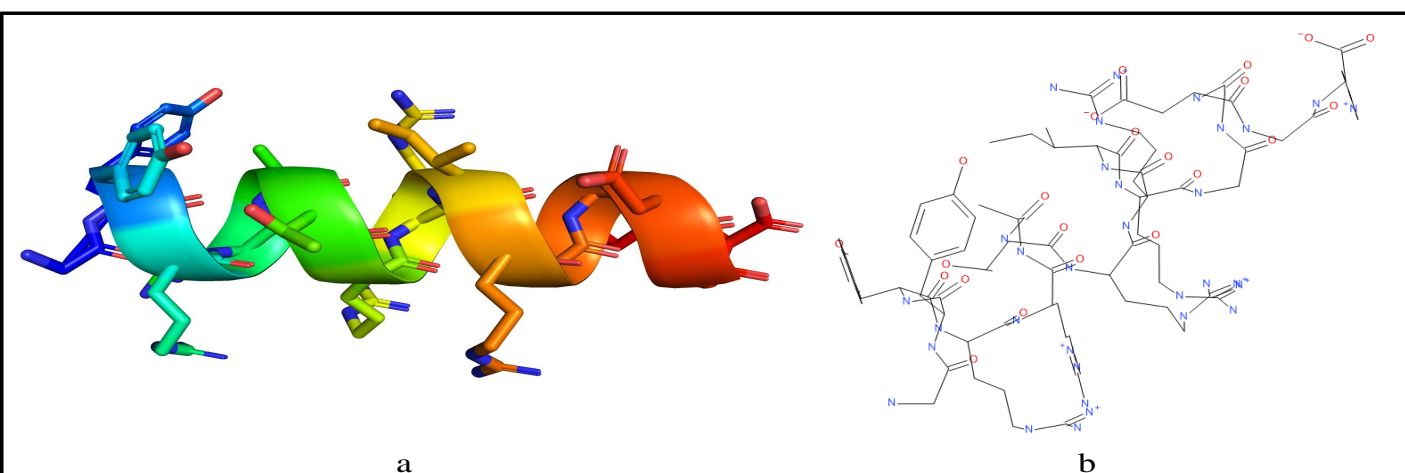

Figure S67: Structural representation for B-cell epitope "GYRRATRRIRGGDGK" (a) 3D structure of the epitope (b) Chemical structure of the epitope
